# Supplementary material for: Phase I feasibility study of Magnetic Resonance guided High Intensity Focused Ultrasound-induced hyperthermia, Lyso-Thermosensitive Liposomal Doxorubicin and cyclophosphamide in de novo stage IV breast cancer patients: study protocol of the i-GO study
Source: PubMed Central journal article supplement — BMJ Open. 2020 Nov 26;10(11):e040162. doi: 10.1136/bmjopen-2020-040162 (PMC7692846; doi:10.1136/bmjopen-2020-040162), 2020-11-26
Supplement: bmjopen-2020-040162.draft_revisions.pdf [file bmjopen-2020-040162.draft_revisions.pdf]

# BMJ Open

BMJ Open is committed to open peer review. As part of this commitment we make the peer review history of every article we publish publicly available.

When an article is published we post the peer reviewers' comments and the authors' responses online. We also post the versions of the paper that were used during peer review. These are the versions that the peer review comments apply to.

The versions of the paper that follow are the versions that were submitted during the peer review process. They are not the versions of record or the final published versions. They should not be cited or distributed as the published version of this manuscript.

BMJ Open is an open access journal and the full, final, typeset and author-corrected version of record of the manuscript is available on our site with no access controls, subscription charges or pay-per-view fees (<http://bmjopen.bmj.com>).

If you have any questions on BMJ Open's open peer review process please email [info.bmjopen@bmj.com](mailto:info.bmjopen@bmj.com)

# BMJ Open

## Image-guided targeted doxorubicin delivery using thermosensitive liposomes and hyperthermia to optimize loco-regional control in breast cancer; study protocol of the phase I i-GO feasibility study

### Phase I Feasibility Study of High-Intensity Focused Ultrasound-Induced Hyperthermia, Lyso-Thermosensitive Liposomal Doxorubicin, and Cyclophosphamide in Metastatic Breast Cancer

|                               |                                                                                                                                                                                                                                                                                                                                                                                                                                                                                                                                                                                                                                                                                                                                                                                                                                                                                                                                                                                                                                                                                                                                      |
|-------------------------------|--------------------------------------------------------------------------------------------------------------------------------------------------------------------------------------------------------------------------------------------------------------------------------------------------------------------------------------------------------------------------------------------------------------------------------------------------------------------------------------------------------------------------------------------------------------------------------------------------------------------------------------------------------------------------------------------------------------------------------------------------------------------------------------------------------------------------------------------------------------------------------------------------------------------------------------------------------------------------------------------------------------------------------------------------------------------------------------------------------------------------------------|
| Journal:                      | <i>BMJ Open</i>                                                                                                                                                                                                                                                                                                                                                                                                                                                                                                                                                                                                                                                                                                                                                                                                                                                                                                                                                                                                                                                                                                                      |
| Manuscript ID                 | bmjopen-2020-040162                                                                                                                                                                                                                                                                                                                                                                                                                                                                                                                                                                                                                                                                                                                                                                                                                                                                                                                                                                                                                                                                                                                  |
| Article Type:                 | Protocol                                                                                                                                                                                                                                                                                                                                                                                                                                                                                                                                                                                                                                                                                                                                                                                                                                                                                                                                                                                                                                                                                                                             |
| Date Submitted by the Author: | 06-May-2020                                                                                                                                                                                                                                                                                                                                                                                                                                                                                                                                                                                                                                                                                                                                                                                                                                                                                                                                                                                                                                                                                                                          |
| Complete List of Authors:     | de Maar, Josanne; University Medical Center Utrecht, Utrecht University, Division of Imaging & Oncology<br>Suelmann, Britt; University Medical Center Utrecht, Utrecht University, Division of Imaging & Oncology<br>Baat, Manon; University Medical Center Utrecht, Utrecht University, Division of Imaging & Oncology<br>van Diest, Paul; University Medical Center Utrecht, Department of Pathology<br>Vaessen, Paul; Universitair Medisch Centrum Utrecht, Anesthesiology<br>Witkamp, Arjen ; University Medical Center Utrecht, Utrecht University, Division of Imaging & Oncology<br>Linn, S. C.; Nederlands Kanker Instituut - Antoni van Leeuwenhoek Ziekenhuis, Department of Molecular Pathology, C2; University Medical Center Utrecht, Utrecht University, Division of Imaging & Oncology<br>Moonen, Chrit; University Medical Center Utrecht, Utrecht University, Division of Imaging & Oncology<br>van der Wall, Elsken; University Medical Center Utrecht, Utrecht University, Division of Imaging & Oncology<br>Deckers, Roel; University Medical Center Utrecht, Utrecht University, Division of Imaging & Oncology |
| Keywords:                     | ONCOLOGY, Breast tumours < ONCOLOGY, Interventional radiology < RADIOLOGY & IMAGING, Magnetic resonance imaging < RADIOLOGY & IMAGING, Ultrasound < RADIOLOGY & IMAGING, CHEMOTHERAPY                                                                                                                                                                                                                                                                                                                                                                                                                                                                                                                                                                                                                                                                                                                                                                                                                                                                                                                                                |
|                               |                                                                                                                                                                                                                                                                                                                                                                                                                                                                                                                                                                                                                                                                                                                                                                                                                                                                                                                                                                                                                                                                                                                                      |

SCHOLARONE™  
Manuscripts

1  
2  
3  
4  
5  
6  
7  
8  
9  
10  
11  
12  
13  
14  
15  
16  
17  
18  
19  
20  
21  
22  
23  
24  
25  
26  
27  
28  
29  
30  
31  
32  
33  
34  
35  
36  
37  
38  
39  
40  
41  
42  
43  
44  
45  
46  
47  
48  
49  
50  
51  
52  
53  
54  
55  
56  
57  
58  
59  
60

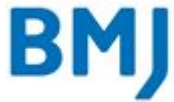

I, the Submitting Author has the right to grant and does grant on behalf of all authors of the Work (as defined in the below author licence), an exclusive licence and/or a non-exclusive licence for contributions from authors who are: i) UK Crown employees; ii) where BMJ has agreed a CC-BY licence shall apply, and/or iii) in accordance with the terms applicable for US Federal Government officers or employees acting as part of their official duties; on a worldwide, perpetual, irrevocable, royalty-free basis to BMJ Publishing Group Ltd ("BMJ") its licensees and where the relevant Journal is co-owned by BMJ to the co-owners of the Journal, to publish the Work in this journal and any other BMJ products and to exploit all rights, as set out in our [licence](#).

The Submitting Author accepts and understands that any supply made under these terms is made by BMJ to the Submitting Author unless you are acting as an employee on behalf of your employer or a postgraduate student of an affiliated institution which is paying any applicable article publishing charge ("APC") for Open Access articles. Where the Submitting Author wishes to make the Work available on an Open Access basis (and intends to pay the relevant APC), the terms of reuse of such Open Access shall be governed by a Creative Commons licence – details of these licences and which [Creative Commons](#) licence will apply to this Work are set out in our licence referred to above.

Other than as permitted in any relevant BMJ Author's Self Archiving Policies, I confirm this Work has not been accepted for publication elsewhere, is not being considered for publication elsewhere and does not duplicate material already published. I confirm all authors consent to publication of this Work and authorise the granting of this licence.

1  
2  
3 **1 Title**  
4

5  
6 2 Image-guided targeted doxorubicin delivery using thermosensitive liposomes and  
7  
8 3 hyperthermia to optimize loco-regional control in breast cancer; study protocol of the  
9  
10  
11 4 phase I i-GO feasibility study  
12  
13  
14 5

15  
16 **6 Subtitle**  
17

18  
19 7 Phase I Feasibility Study of High-Intensity Focused Ultrasound-Induced Hyperthermia,  
20  
21  
22 8 Lyso-Thermosensitive Liposomal Doxorubicin, and Cyclophosphamide in Metastatic  
23  
24  
25 9 Breast Cancer  
26  
27 10

28  
29  
30 **11 Authors**  
31

32 12 J.S. de Maar<sup>1</sup> (corresponding author) [J.S.deMaar@umcutrecht.nl](mailto:J.S.deMaar@umcutrecht.nl)  
33  
34  
35 13 B.B.M. Suelmann<sup>1</sup> [B.B.M.Suelmann@umcutrecht.nl](mailto:B.B.M.Suelmann@umcutrecht.nl)  
36  
37  
38 14 M.N.G.J.A. Braat<sup>1</sup> [M.N.G.Braat-3@umcutrecht.nl](mailto:M.N.G.Braat-3@umcutrecht.nl)  
39  
40  
41 15 P.J. van Diest<sup>1</sup> [P.J.vanDiest@umcutrecht.nl](mailto:P.J.vanDiest@umcutrecht.nl)  
42  
43  
44 16 H.H.B. Vaessen<sup>1</sup> [H.H.B.Vaessen@umcutrecht.nl](mailto:H.H.B.Vaessen@umcutrecht.nl)  
45  
46  
47 17 A. J. Witkamp<sup>1</sup> [A.J.Witkamp@umcutrecht.nl](mailto:A.J.Witkamp@umcutrecht.nl)  
48  
49  
50 18 S. Linn<sup>1, 2</sup> [s.linn@nki.nl](mailto:s.linn@nki.nl)  
51  
52  
53 19 C.T.W. Moonen<sup>1</sup> [C.Moonen@umcutrecht.nl](mailto:C.Moonen@umcutrecht.nl)  
54  
55  
56 20 E. van der Wall<sup>1</sup> [E.vanderWall@umcutrecht.nl](mailto:E.vanderWall@umcutrecht.nl)  
57  
58  
59 21 R. Deckers<sup>1</sup> [R.Deckers-2@umcutrecht.nl](mailto:R.Deckers-2@umcutrecht.nl)  
60  
61

1  
2  
3 **1 Institutional address**  
4

5  
6 2 1. University Medical Center Utrecht, Utrecht University  
7

8  
9 3 Heidelberglaan 100, 3584 CX  
10

11  
12 4 Huispostnummer Q 00.3.11, Postbus 85500,  
13

14  
15 5 Utrecht, The Netherlands  
16

17  
18 6 2. Netherlands Cancer Institute - Antoni van Leeuwenhoek hospital,  
19

20  
21 7 Plesmanlaan 121, 1066 CX  
22

23  
24 8 Postbus 90203, 1006 BE  
25

26  
27 9 Amsterdam, The Netherlands  
28

29  
30  
31  
32  
33  
34  
35  
36  
37  
38  
39  
40  
41  
42  
43  
44  
45  
46  
47  
48  
49  
50  
51  
52  
53  
54  
55  
56  
57  
58  
59  
60

10

11

12

13

14

15

16

17

18

19

20

## 1 **Abstract**

### 2 **Introduction**

3 In breast cancer, local tumour control is thought to be optimized by administering  
4 higher local levels of cytotoxic chemotherapy, in particular doxorubicin. However,  
5 systemic administration of higher dosages of doxorubicin is hampered by its toxic  
6 side effects. In this study, we aim to increase doxorubicin deposition in the primary  
7 tumour without changing systemic doxorubicin concentration and thus without  
8 interfering with systemic efficacy and toxicity. This is to be achieved by combining  
9 lyso-thermosensitive liposomal doxorubicin (LTLD, ThermoDox®, Celsion  
10 Corporation, Lawrenceville, NJ, USA) with mild local hyperthermia, induced by  
11 Magnetic Resonance guided High Intensity Focused Ultrasound (MR-HIFU). When  
12 heated above 39.5 °C, LTLD releases a high concentration of doxorubicin  
13 intravascularly within seconds. In absence of hyperthermia, LTLD leads to a similar  
14 biodistribution and antitumour efficacy compared to conventional doxorubicin.

### 15 **Methods and analysis**

16 This is a single-arm phase I study in 12 chemotherapy-naïve patients with *de novo*  
17 stage IV HER2-negative breast cancer. Previous endocrine treatment is allowed. Study  
18 treatment consists of up to 6 cycles of LTLD at 21-day intervals, administered during  
19 MR-HIFU induced hyperthermia to the primary tumour. We will aim for 60 minutes of  
20 hyperthermia at 40-42 °C using a dedicated MR-HIFU breast system (Profound  
21 Medical, Mississauga, Canada). Afterwards, intravenous cyclophosphamide will be

1 administered. Primary endpoints are safety, tolerability and feasibility. The secondary  
2 endpoint is efficacy, assessed by radiological response.

### 3 **Future impact**

4 This approach could lead to optimal loco-regional control with less extensive or even  
5 no surgery, in *de novo* stage IV patients and in stage II/III patients allocated to receive  
6 neo-adjuvant chemotherapy.

### 7 **Ethics and dissemination**

8 This study has obtained ethical approval by the Medical Research Ethics Committee  
9 UMC Utrecht (Protocol NL67422.041.18, METC number 18-702). Informed consent will  
10 be obtained from all patients before study participation. Results will be published in  
11 an academic journal.

### 12 **Trial registration number**

13 NCT03749850, EudraCT 2015-005582-23.

### 15 **Keywords**

16 High Intensity Focused Ultrasound,

17 MR-HIFU

18 ThermoDox

19 Lyso-thermosensitive liposomal doxorubicin (LTLD)

20 Temperature sensitive liposome

21 Targeted drug delivery

22 Hyperthermia



- 1
- 2
- 3 1 Image-guided therapy
- 4
- 5
- 6 2 De novo stage IV breast cancer
- 7
- 8 3 Synchronous stage IV breast cancer
- 9
- 10
- 11 4 Metastatic breast cancer
- 12
- 13
- 14 5
- 15

## 6 **Strengths and limitations**

- 7
  - 8 • This first in human clinical trial investigates the combination of Lyso-
  - 9 Thermosensitive Liposomal Doxorubicin and Magnetic Resonance guided High
  - 10 Intensity Focused Ultrasound induced hyperthermia in breast cancer patients.
  - 11 • A dedicated MR-HIFU breast system with real-time MR temperature feedback
  - 12 will be used for safe non-invasive local hyperthermia treatment of breast
  - 13 tumours.
  - 14 • Because the study population consists of patients with *de novo* stage IV breast
  - 15 cancer, both local and systemic response to the treatment can be monitored.
  - 16 • A survival benefit of treating the primary tumour in patients with metastatic
  - 17 breast cancer has not been proven, therefore study participants will participate
  - 18 altruistically in the interest of future patients.
  - 19 • This approach could lead to improved local control during palliative
  - 20 chemotherapy in *de novo* stage IV breast cancer or neoadjuvant chemotherapy
  - in stage II/III disease, with less extensive or even no surgery.

## 1 **Introduction**

2 Both neo-adjuvant and adjuvant chemotherapy of breast cancer aim to improve  
3 survival by eradicating microscopic distant metastases. In addition, neo-adjuvant  
4 treatment offers the opportunity to observe the biological behaviour of the primary  
5 tumour and increase the likelihood of less extensive radical (breast conserving)  
6 surgery. Given the fact that pathological complete response (pCR) is achieved at best  
7 in 68% of patients [1], efforts should be focused on improving primary tumour  
8 response. This may be achieved by increasing the dose of chemotherapy at the site of  
9 the tumour. In pre-clinical data, a higher concentration of chemotherapy in the  
10 tumour is correlated with increased tumour response, in particular for doxorubicin,  
11 one of the most frequently applied cytostatics in breast cancer treatment [2, 3].  
12 However, the administration of higher doses of doxorubicin is hampered by its  
13 systemic side effects. In the i-GO study we aim to increase doxorubicin levels in the  
14 primary tumour, without interfering with systemic efficacy and toxicity, by combining  
15 lyso-thermosensitive liposomal doxorubicin (LTLD, ThermoDox®; Celsion  
16 Corporation, Lawrenceville, NJ, USA) with mild local hyperthermia, induced by  
17 Magnetic Resonance guided High Intensity Focused Ultrasound (MR-HIFU). This will  
18 be followed by the intravenous administration of a second cytostatic agent,  
19 cyclophosphamide. The combined administration of doxorubicin and  
20 cyclophosphamide (AC) is a well-known regimen in the standard of care treatment in  
21 both the (neo-) adjuvant setting as in the treatment of metastatic breast cancer.

1  
2  
3 1 The i-GO study will be a phase I feasibility study in stage IV breast cancer patients  
4  
5  
6 2 who present with distant metastases and a primary tumour in situ (*de novo* stage IV  
7  
8  
9 3 patients). Several studies suggest that by obtaining loco-regional control in  
10  
11 4 metastatic breast cancer, overall survival in advanced disease will be improved [4, 5].  
12  
13  
14 5 However, randomized controlled trials have shown conflicting results [6, 7]. As such it  
15  
16  
17 6 remains a subject of continuous research.

### 19 Lyso-thermosensitive liposomal doxorubicin

21  
22 8 LTLD is a temperature-sensitive liposomal encapsulation of doxorubicin. Doxorubicin  
23  
24  
25 9 is a cytotoxic (chemotherapy) agent that is approved and frequently used for the  
26  
27  
28 10 treatment of a wide range of cancers, including breast cancer. When heated to 40-42  
29  
30  
31 11 °C, LTLD releases the encapsulated doxorubicin intravascularly within seconds [8-10].  
32  
33  
34 12 (Figure 1.) In small animal tumour models, LTLD combined with hyperthermia results  
35  
36  
37 13 in a 3-25 fold higher tumour concentration than conventional doxorubicin [2, 11-15]  
38  
39  
40 14 and increased antitumour efficacy [2, 9, 11]. In the absence of hyperthermia,  
41  
42  
43 15 doxorubicin leaks slowly from the liposome, and after two hours all of the  
44  
45  
46 16 doxorubicin is released [8]. Furthermore, LTLD without hyperthermia leads to a similar  
47  
48  
49 17 biodistribution [12, 13] and antitumour efficacy [9, 11] compared to conventional  
50  
51  
52 18 doxorubicin.

### 51 Magnetic resonance-guided high intensity focused ultrasound

53  
54 20 MR-HIFU is a truly non-invasive treatment modality, that combines magnetic  
55  
56  
57 21 resonance imaging (MRI) and high intensity focused ultrasound to perform image-  
58  
59  
60 22 guided thermal tissue ablation (55-70 °C) [16-18] or mild local hyperthermia (40-43

1 °C [19-21]. Unlike other heating methods, using microwaves, radiofrequency or non-  
2 focused ultrasound, HIFU allows for non-invasive localized heating of deep-seated  
3 tumours [22]. In addition to treatment planning based on anatomical MRI, MR-  
4 guidance can provide temperature feedback and control during hyperthermia  
5 treatment, through real-time MR-thermometry. For this study we will use a dedicated  
6 MR-HIFU breast system: the Sonalleve MR-HIFU breast tumour therapy system  
7 (hereafter referred to as 'MR-HIFU breast system', Profound Medical, Mississauga,  
8 Canada), integrated with a clinical 1.5 Tesla MR scanner (Achieva, Philips Healthcare,  
9 Best, The Netherlands). This system has a lateral sonication approach, which enables  
10 specific heating of the breast tumour, while reducing the risk of heating the skin or  
11 other organs to a minimum [23]. A phase I study in our hospital with MR-HIFU  
12 ablation of breast tumours showed that the MR-HIFU breast system allows for safe,  
13 accurate and precise thermal ablation [24, 25].

#### 14 Previous clinical studies

15 This will be the first-in-human study to evaluate LTLD with MR-HIFU hyperthermia in  
16 breast cancer patients. LTLD has been studied previously in combination with  
17 superficial hyperthermia in patients with chest wall recurrences of breast cancer [26].  
18 This phase I/II study showed that LTLD at 40 mg/m<sup>2</sup> with superficial hyperthermia was  
19 safe and the 48% overall response (14/29, 95% CI:30–66%) was promising in this  
20 heavily pre-treated population. A large randomized phase III study in 701 patients  
21 with hepatocellular carcinoma compared LTLD at 50 mg/m<sup>2</sup> with radiofrequency  
22 ablation (RFA) to RFA alone (the HEAT study) [27, 28]. In that study the primary

1  
2  
3 1 endpoint of 33% improvement in progression free survival was not met. However, a  
4  
5  
6 2 post-hoc analysis in the subgroup of 285 patients with solitary lesions that were  
7  
8  
9 3 treated with  $\geq 45$  min of RFA showed a significant overall survival benefit for the  
10  
11 4 combination treatment (Hazard Ratio for Overall Survival 0.63 (95% CI, 0.41–0.96;  $P <$   
12  
13 5 0.05), in favour of RFA+LTLD with  $\geq 45$  minutes heating). Systemic adverse events  
14  
15  
16 6 increased in the RFA+LTLD arm (83% vs 35% with RFA alone) as expected, with a  
17  
18  
19 7 similar profile to that of conventional doxorubicin [28].  
20  
21  
22 8 Furthermore, the combination of LTLD and ultrasound guided HIFU hyperthermia has  
23  
24  
25 9 been evaluated in a phase I proof-of-concept study in ten patients with incurable  
26  
27  
28 10 primary or metastatic liver tumours (the TARDOX study) [29, 30]. Adverse events did  
29  
30  
31 11 not differ from those associated with doxorubicin alone and in the group of patients  
32  
33  
34 12 that underwent invasive thermometry sufficient mean tumour temperatures were  
35  
36  
37 13 measured. In seven out of ten patients, the intratumoural doxorubicin concentration  
38  
39  
40 14 doubled after HIFU, although a within-patient comparison was not possible for all  
41  
42  
43 15 patients. We aim to take advantage of the same principle to treat the primary tumour  
44  
45  
46 16 in patients presenting with metastatic breast cancer. Monitoring the treatment by  
47  
48  
49 17 MR-thermometry may further enhance safety, efficacy and feasibility. Using multiple  
50  
51  
52 18 cycles of LTLD + MR-HIFU hyperthermia is expected to increase treatment efficacy  
53  
54  
55 19 and mimics the standard of care treatment.

## 20 **Methods and analysis**

21 This single-arm phase I feasibility study aims to determine the safety, tolerability and  
22 feasibility of the combination of LTLD, MR-HIFU induced mild local hyperthermia, and

1 cyclophosphamide, for the enhanced local treatment of the primary tumour in  
2 patients presenting with metastatic breast cancer. All eligible participants will receive  
3 up to 6 cycles of LTLD at 21-day intervals, administered during MR-HIFU induced  
4 hyperthermia to the primary tumour and cyclophosphamide administered afterwards.

#### 5 Patient population

6 We will include 6 or 12 adult female patients with *de novo* stage IV (distant  
7 metastases at the time of diagnosis, with the primary tumour in situ) HER2-negative  
8 breast cancer, who have not received previous chemotherapy for their disease.  
9 Previous endocrine treatment in those with hormone-receptor positive disease is  
10 allowed. Potentially eligible patients will be referred to the department of Medical  
11 Oncology at the University Medical Center Utrecht, The Netherlands.

#### 12 Inclusion criteria

13 Patients must meet all of the following inclusion criteria:

- 14 • Histologically confirmed adenocarcinoma of the breast and planned for palliative  
15 chemotherapy with doxorubicin and cyclophosphamide.
- 16 • Biopsy-proven stage T1-2AnyNM1 at diagnosis of breast cancer.
- 17 • Measurable disease according to either RECIST 1.1 or PERCIST 1.0 at baseline.
- 18 • Non-pregnant, non-lactating female at least 18 years of age. If the patient is of  
19 child-bearing age, she must have a negative serum pregnancy test prior to enrolment and  
20 must agree to practice an acceptable form of birth control while on study.
- 21 • The tumour is located within the reach of the HIFU beam (based on pre-treatment  
22 dynamic contrast-enhanced (DCE-) MRI findings).
- 23 • The distance of the tumour from the skin, nipple, and pectoral wall is at least 1.0 cm  
24 (based on pre-treatment DCE-MRI findings).

- 1
- 2
- 3 1 • The target breast is expected to fit in the cup of the MR-HIFU breast system (based
- 4
- 5 2 on pre-treatment MRI findings).
- 6
- 7 3 • The patient is able to provide written informed consent and willing to comply with
- 8
- 9 4 protocol requirements.

### 11 Exclusion criteria

12 Patients will be excluded if any of the following conditions are observed:

- 13
- 14
- 15 6
- 16
- 17 7 • HER2-positive disease or classic invasive lobular carcinoma (ILC).
- 18
- 19 8 • A treatment plan with curative intent is available.
- 20
- 21 9 • Any prior chemotherapy treatment for invasive breast cancer (previous anti-
- 22
- 23 10 hormonal therapy is allowed).
- 24
- 25
- 26 11 • Any prior therapy with anthracyclines.
- 27
- 28 12 • The patient weighs  $\geq 90$  kg (restriction of the HIFU table top).
- 29
- 30 13 • Any concomitant malignancy or previous malignancy in the last 5 years, except
- 31
- 32 14 basal cell or squamous cell cancer of the skin or in situ carcinoma of the cervix. Subjects with a
- 33
- 34 15 prior contralateral breast malignancy more than 5 years ago can be included if they did not
- 35
- 36 16 receive any chemotherapy.
- 37
- 38
- 39 17 • Any previous malignancy in the unilateral breast (even if more than 5 years ago)
- 40
- 41 18 • Prior sensitivity (including rash, dyspnoea, wheezing, urticarial, or other symptoms)
- 42
- 43 19 attributed to any liposomal-encapsulated drug.
- 44
- 45
- 46 20 • Baseline laboratory values:
- 47
- 48 21 Absolute Neutrophil Count (ANC)  $< 1.5 \times 10^9/L$
- 49
- 50 22 Platelets  $< 75 \times 10^9/L$
- 51
- 52 23 Haemoglobin  $< 5.6$  mmol/L (transfusion is allowed)
- 53
- 54 24 Total Bilirubin  $> 1.5$  times upper limit of normal
- 55
- 56
- 57 25 Alanine Transaminase (ALAT) and Aspartate Transaminase (ASAT)
- 58
- 59 26  $> 2.5$  times upper limit of normal
- 60

- 1  
2  
3 1 >5 times upper limit of normal in case of liver  
4  
5 2 metastases  
6  
7 3 Estimated Glomerular Filtration Rate < 30 ml/min/1.73m<sup>2</sup>  
8  
9  
10 4 • World Health Organization Performance Status (WHO-PS) >2.  
11  
12 5 • Left Ventricular Ejection Fraction <50% (validated by baseline scan).  
13  
14 6 • History of: acute coronary syndrome in the last year, cerebral vascular accident in  
15  
16 7 the last year, abnormal cardiac stress testing within the last six months, symptomatic coronary  
17  
18 8 artery disease, uncontrolled hypertension or cardiomyopathy, cardiac valvular surgery or  
19  
20 9 open-heart surgery in the last year or known structural heart disease.  
21  
22  
23 10 • Any condition which may interfere with the hyperthermia portion of the trial such  
24  
25 11 as: functioning cardiac pacemaker; metal plates, rods or prosthesis of the chest wall, breast  
26  
27 12 prosthesis in the treated breast, severe numbness and/or tingling of the chest wall or breast,  
28  
29 13 skin grafts and/or flaps on the breast or chest wall, scar tissue or surgical clips in the HIFU  
30  
31 14 beam path.  
32  
33  
34 15 • Active infection.  
35  
36 16 • Body temperature > 38.0 degrees Celsius on the day of a MR-HIFU treatment.  
37  
38 17 • Concurrent use of any of the following prohibited medications within a reasonable  
39  
40 18 wash-out time: protease inhibitors, cyclosporine, carbamazepine, phenytoin, valproic acid,  
41  
42 19 paclitaxel, trastuzumab and other liposomal drugs (Abelect<sup>TM</sup>, Ambisome<sup>TM</sup>, Nyotran<sup>TM</sup>, etc.)  
43  
44 20 or lipid-complexed drugs. Caution will be exercised with medications, dietary components and  
45  
46 21 herbal supplements that affect CYP2A4, CYP2D6 or P-gp or have been described to interact  
47  
48 22 with doxorubicin in other ways.  
49  
50  
51 23 • Contraindications to MR imaging (e.g., pacemaker in situ, severe claustrophobia,  
52  
53 24 metal implants incompatible with the MRI-scan, body size incompatible with MR bore).  
54  
55  
56 25 • Contraindications to gadolinium-based contrast agents, including prior allergic  
57  
58 26 reaction to gadolinium-based contrast agent, and/or renal failure.  
59  
60



- 1  
2  
3 1 • Contraindications to sedation and analgesia with Propofol and Remifentanyl,  
4  
5 2 including history of Chronic Obstructive Pulmonary Disease (COPD) that results in the inability  
6  
7 3 to perform a physical activity corresponding with a Metabolic Equivalent (MET(57)) of 4;  
8  
9 4 dependence on artificial ventilation at home; sleep apnoea or an American Society of  
10  
11 5 Anaesthesiologists (ASA) classification  $\geq 4$ .  
12  
13  
14 6 • Inability to lie in prone position.  
15  
16 7 • A medical or psychiatric condition or other circumstances which would significantly  
17  
18 8 decrease the chances of understanding the informed consent process, obtaining reliable data,  
19  
20 9 achieving study objectives, or completing the study treatment and/or examinations.  
21  
22

## 23 Endpoints

24  
25  
26 11 Primary endpoints are safety, tolerability and feasibility. These will be evaluated by  
27  
28 12 the following assessments.

### 30 31 13 Safety and tolerability:

- 32  
33  
34 14 • Incidence and severity of Adverse Events and Severe Adverse Events  
35  
36 15 • Incidence of Dose Limiting Toxicity (DLT, systemic and loco-regional)  
37  
38  
39 16 • Necessity for dose adjustments, delay and early cessation  
40  
41  
42 17 • Incidence and severity of post-procedural pain  
43  
44 18 • Patient reported tolerability (questionnaires)  
45  
46  
47 19 • Cardiotoxicity: Left Ventricular Ejection Fraction measurement and  
48  
49 20 electrocardiogram abnormalities.

### 51 52 21 Feasibility:

- 53  
54  
55 22 • The number of cycles in which hyperthermia treatment was sufficient: at least  
56  
57 23 30 minutes at the target temperature of 40-42 °C.  
58  
59  
60

- 1
- 2
- 3 1 • The number of completed cycles with MR-HIFU induced hyperthermia, LTLD
- 4
- 5
- 6 2 and cyclophosphamide
- 7
- 8 3 • Quality of MR thermometry data acquired during the MR-HIFU treatment
- 9
- 10
- 11 4 • Spatiotemporal temperature distribution in the tumour
- 12
- 13
- 14 5 • Total duration of the study procedures on a treatment day.
- 15
- 16 6 Secondary endpoints consist of efficacy parameters:
- 17
- 18
- 19 7 • Assessment of distant radiological objective response rates
- 20
- 21
- 22 8 • Assessment of local radiological objective response rates
- 23

#### 24 9 Study procedures

25

26

27 10 The study design (Figure 2) was based on the AC regimen, a well-known

28

29

30 11 chemotherapeutic regimen that consists of doxorubicin and cyclophosphamide. This

31

32 12 regimen is used in the (neo-)adjuvant setting as well as in the first-line chemotherapy

33

34

35 13 treatment of metastatic breast cancer. Standard of care for our study population

36

37

38 14 consists of 6 cycles at 21-days intervals. In this study we will replace doxorubicin in

39

40 15 this regimen with the combination of LTLD and MR-HIFU induced hyperthermia.

41

42

43 16 All participants will receive procedural sedation and analgesia with propofol and

44

45 17 remifentanyl to limit patient movement during the treatment and to establish a

46

47 18 regular breathing pattern that will facilitate respiratory gated MR-thermometry [31].

48

49

50 19 To prevent any hypersensitivity reactions to LTLD, the participants will also receive a

51

52 20 premedication regimen of steroids, H1- and H2- histamine antagonists.

53

54

55 21 MR-HIFU hyperthermia will be performed on the MR-HIFU breast system, with the

56

57 22 patient in prone position. We will aim for 60 minutes of hyperthermia at 40-42 °C to

58

59

60

1 the breast tumour, in four blocks of 15 minutes. After each block the MR  
2 thermometry is restarted to minimize the possible influence of magnetic field drift or  
3 patient displacement. When MR thermometry indicates that the target temperature is  
4 reached, 50 mg/m<sup>2</sup> of LTLD will be administered intravenously over 30 minutes, via a  
5 peripherally inserted central catheter (PICC), while the patient is on the MR-HIFU  
6 breast system. Temperature will be monitored by respiratory navigator-gated MR-  
7 thermometry, using the proton resonance frequency shift method [32, 33]. In case the  
8 target temperature is not reached, conventional doxorubicin (60 mg/m<sup>2</sup>) will be  
9 administered instead of LTLD. Shortly after MR-HIFU, 600 mg/m<sup>2</sup> of  
10 cyclophosphamide will be administered intravenously according to standard of care  
11 in the AC regimen.

12 Participants will receive up to six treatment cycles. Feasibility will be evaluated after  
13 each MR-HIFU treatment and during the course of the cycles. Safety and tolerability  
14 will be assessed three hours after MR-HIFU treatment, during telephone contact on  
15 day +1 and +7 and during a hospital visit on day +14 and +21 of each cycle, by  
16 monitoring of adverse events, laboratory measurements and evaluation of pain.

17 Cardiotoxicity evaluations (LVEF and ECG) will be performed at baseline, after cycle 3  
18 and after cycle 6. The participants will be asked to fill out the Dutch version of the  
19 Functional Assessment of Cancer Therapy – Breast (FACT-B, version 4, FACIT)[34] at  
20 baseline and after each treatment cycle, combined with a selection of questions  
21 adapted from the Dutch version of the Cancer Therapy Satisfaction Questionnaire  
22 (CTSQ, Pfizer 2007, modified with permission from Pfizer)[35, 36] in cycles 3 and 6.

1  
2  
3 1 Before starting the next cycle, any toxicities will be evaluated and if necessary, dose  
4  
5  
6 2 adjustments will be made. DLT will be categorized in systemic or loco-regional  
7  
8  
9 3 toxicity (Table 1). Thus, we aim to distinguish systemic chemotherapy effects from  
10  
11 4 local effects of MR-HIFU hyperthermia and/or the high local doxorubicin  
12  
13  
14 5 concentration. Planned dose adjustments for these categories have been established.  
15  
16 6 In case of a systemic DLT the LTLT dosage will be decreased, while for loco-regional  
17  
18  
19 7 DLT the duration of hyperthermia will be decreased. No dose increases will be  
20  
21  
22 8 performed. Depending on the severity and nature of the toxicity, study treatment can  
23  
24  
25 9 be delayed or even ceased. In case of solely loco-regional DLT, technical issues or  
26  
27  
28 10 other feasibility issues that restrict the use of MR-HIFU treatment, the participant will  
29  
30  
31 11 receive the standard of care AC regimen. If hyperthermia is insufficient (i.e. the target  
32  
33  
34 12 temperature of 40-42 °C is not reached or was only maintained for less than 30  
35  
36  
37 13 minutes) in two separate cycles, the treatment is not considered feasible for that  
38  
39  
40 14 patient and study participation will end.  
41  
42  
43 15 For the secondary endpoint of efficacy, MRI of the breast will be performed using a 3  
44  
45  
46 16 Tesla MRI scanner with a dedicated breast coil, at baseline and after cycle 2 and 6 to  
47  
48  
49 17 determine local radiological objective response. In addition, MRI of the breast will be  
50  
51  
52 18 performed during each MR-HIFU treatment. However, the receiver coil in the MR-  
53  
54  
55 19 HIFU breast system is not suited for clinical imaging. In case a complete radiological  
56  
57  
58 20 response of the breast tumour is obtained after less than 6 cycles, the patient will  
59  
60  
61 21 continue with the conventional AC regimen. <sup>18</sup>F -fluorodeoxyglucose (FDG-) Positron  
62  
63  
64 22 Emission Tomography combined with Computed Tomography (PET/CT) of the thorax

1  
2  
3 1 and abdomen will be performed at baseline and CT or PET/CT after cycle 2 and cycle  
4  
5  
6 2 6, to determine the distant objective response according to RECIST 1.1 [37] or  
7  
8  
9 3 PERCIST 1.0 [38]. PET/CT will be performed for response evaluation in patients with  
10  
11 4 only PERCIST-measurable disease, such as patients with only bone metastases.

12  
13  
14 5 The participants will be followed for adverse events from the time of signing  
15  
16 6 informed consent until the end of study visit after six cycles of chemotherapy.

17  
18  
19 7 Afterwards patients will receive standard of care treatment.

20  
21  
22 8 If the patient consents to the biobank study, additional blood samples will be taken  
23  
24 9 from the PICC-line at seven time points (Figure 2) when the patient is already at the  
25  
26  
27 10 hospital. These blood samples will be collected in the UMC Utrecht Biobank for future  
28  
29  
30 11 research. Moreover, in case tissue samples of the breast tumour and/or metastases  
31  
32 12 were obtained in standard care before inclusion or following study participation, we  
33  
34  
35 13 will ask for consent to perform additional analyses on these samples.

#### 36 37 38 14 Interim analysis

39  
40 15 An interim analysis of safety and efficacy will determine whether accrual will continue  
41  
42 16 after six participants (Supplementary materials 1). Safety will be evaluated once the  
43  
44 17 first six patients complete two treatment cycles. If safety is sufficiently proven or is  
45  
46 18 deemed inadequate, the trial will end after six participants. Otherwise accrual will  
47  
48 19 continue until twelve patients have been treated, if necessary after dose adjustments.  
49  
50  
51 20 Systemic efficacy will be evaluated once the first six patients have received the CT  
52  
53  
54 21 scan after cycle 2. If four or more of the first six participants show distant disease  
55  
56  
57 22 progression at that time the trial will be stopped, as this suggests that efficacy against  
58  
59  
60

1 disease outside the heated treatment field is inadequate. This early stopping rule was  
2 based on a phase III trial with liposomal doxorubicin in metastatic breast cancer [39]  
3 where 77.5% of the subjects were free of disease progression at two months post-  
4 randomization (the 95% confidence interval of 2/6 patients does not contain 0.775).  
5 An independent, qualified monitor will monitor the study procedures. An external  
6 Data Safety Monitoring Board (DSMB) will review accumulating safety data at regular  
7 intervals throughout the study, perform the interim safety and efficacy analyses and  
8 monitor trial data integrity.

#### 9 Data analysis

10 Descriptive statistics will be used to describe the incidence and severity of adverse  
11 events (National Cancer Institute Common Terminology Criteria for Adverse Events  
12 version 5.0), the patient reported outcomes in the questionnaires and feasibility  
13 parameters including the number of completed study treatment cycles, duration of  
14 study procedures and spatiotemporal temperature distribution during MR-HIFU  
15 treatment. For the secondary endpoint of efficacy, distant and local radiological  
16 objective response rates (RECIST 1.1) will be described.

#### 18 **Discussion**

19 This is the first clinical trial that investigates the combination of LTLD and MR-HIFU  
20 induced hyperthermia in breast cancer. In a small number of patients we will focus  
21 primarily on safety, tolerability and feasibility of this procedure. We hypothesize that  
22 the combination of LTLD and MR-HIFU hyperthermia leads to improved treatment of

1 the primary tumour, without changing the systemic doxorubicin concentration and  
2 thus without interfering with systemic efficacy and toxicity. A future randomized  
3 study with a control group receiving the standard of care AC regimen would be  
4 needed to prove this. Including patients with *de novo* stage IV breast cancer provides  
5 the unique possibility to monitor both local and systemic disease simultaneously.  
6 While in this setting a survival benefit of treating the primary tumour has not been  
7 proven, the study treatment (if proven safe and feasible) could in the future improve  
8 outcomes in the neoadjuvant setting.

9 We aim to replace doxorubicin by LTLD plus MR-HIFU hyperthermia in all six cycles of  
10 the AC regimen, because we expect this to maximize the local treatment effect. In  
11 each cycle, the feasibility to achieve tumour hyperthermia at 40-42 °C for 30 minutes  
12 will be verified with MR-thermometry. If hyperthermia treatment is repeatedly  
13 insufficient, or if (after any number of cycles) radiological complete response is  
14 already obtained, patients will continue on the standard-of-care AC regimen. The  
15 number of MR-HIFU hyperthermia plus LTLD cycles that our patients are willing and  
16 able to complete could be less than six, which would be an important feasibility  
17 finding.

18 Our goal is to maintain an equivalent systemic efficacy compared to the standard-of-  
19 care AC regimen using 60 mg/m<sup>2</sup> conventional doxorubicin. Pharmacokinetic studies  
20 showed that the area-under the curve (AUC<sub>0-∞</sub>) of free/unencapsulated doxorubicin  
21 in plasma of patients receiving LTLD 50 mg/m<sup>2</sup> with local hyperthermia or RFA [26,  
22 40, 41] was higher than the AUC<sub>0-∞</sub> of conventional doxorubicin 60 mg/m<sup>2</sup> [42-44].

1  
2  
3 1 To be able to compare the AUCs we converted the  $AUC_{0-\infty}$  of the metabolite  
4  
5  
6 2 doxorubicinol that was measured in the LTLD studies to the  $AUC_{0-\infty}$  of doxorubicin  
7  
8  
9 3 [45-47] (Additional explanation in Supplementary materials 2). The 50 mg/m<sup>2</sup> LTLD  
10  
11 4 dose was also recommended for and well-tolerated in the phase III trial in  
12  
13  
14 5 combination with RFA [28]. Due to local toxicity, the recommended dose for LTLD  
15  
16  
17 6 combined with local superficial hyperthermia for chest wall recurrences was  
18  
19  
20 7 decreased to 40 mg/m<sup>2</sup> [40]. In our study local (skin) toxicity is not expected because  
21  
22  
23 8 a margin of at least 1.0 cm is preserved from the tumour to the skin, therefore the  
24  
25  
26 9 LTLD dose of 50 mg/m<sup>2</sup> was chosen. Real time MR-thermometry and the lateral  
27  
28  
29 10 configuration of the MR-HIFU breast system will help mitigate this risk. If however  
30  
31  
32 11 local DLT do occur, the duration of hyperthermia will be decreased while maintaining  
33  
34  
35 12 the LTLD dosage to avoid decreasing systemic efficacy. We will only decrease LTLD  
36  
37  
38 13 dosage in case of systemic DLT. If despite these measures, systemic efficacy seems  
39  
40  
41 14 inadequate, the trial will be halted prematurely based on the interim analysis for  
42  
43  
44 15 efficacy.

45  
46 16 Because this is a small phase I feasibility study, the results will only provide a rough  
47  
48  
49 17 indication of local efficacy based on radiological response. To diminish the burden on  
50  
51  
52 18 participants, we will not perform tissue biopsies or breast surgery and therefore  
53  
54  
55 19 cannot describe the number of pathological complete responses or measure the  
56  
57  
58 20 concentration of doxorubicin in the tumour. Proof-of-concept that hyperthermia  
59  
60 21 increases the tumour doxorubicin concentration has already been established in the



1  
2  
3 1 Tardox study, although doxorubicin concentrations were not compared between  
4  
5  
6 2 heated and unheated tumours.  
7  
8  
9 3

#### 10 4 **Conclusions**

11  
12  
13  
14 5 With this phase I clinical trial, we aim to show that LTLT combined with MR-HIFU  
15  
16 6 induced hyperthermia on a dedicated MR-HIFU breast system can safely replace  
17  
18  
19 7 doxorubicin in the AC regimen. We hypothesize that this combination will result in  
20  
21  
22 8 improved response of the primary tumour without compromising the systemic  
23  
24  
25 9 efficacy on metastatic sites or increasing systemic toxicity. If feasibility and tolerability  
26  
27 10 are adequate, this approach could in the future lead to optimal loco-regional control  
28  
29  
30 11 with less extensive or even no surgery, in stage II or III breast cancer patients  
31  
32  
33 12 allocated to receive neo-adjuvant chemotherapy. Finally, it could also be suitable for  
34  
35 13 other doxorubicin sensitive tumour types that benefit from enhanced local treatment,  
36  
37  
38 14 such as soft tissue sarcoma.  
39  
40  
41 15

#### 42 43 16 **Word Count**

44  
45  
46 17 3768 words  
47  
48  
49 18

#### 50 51 19 **Ethics and dissemination**

52  
53  
54 20 This study has obtained ethical approval by the Medical Research Ethics Committee  
55  
56 21 of the UMC Utrecht (METC Utrecht) on May 29<sup>th</sup> 2019 (Protocol NL67422.041.18,  
57  
58  
59 22 METC number 18-702). Informed consent will be obtained by all patients before  
60

1 study participation. The results will be disseminated by publication in an academic  
2 peer-reviewed journal.

### 3 **Patient and public involvement**

4 Patient experiences have been the starting point for the grant proposal to the Dutch  
5 Cancer Foundation and patients were involved in the design of the study and the  
6 choice of outcome measures. Patients will not be actively involved in recruitment or  
7 dissemination of study results, however information regarding the study can be  
8 found by individual patients on the UMC Utrecht website and clinicaltrials.gov.

### 9 **Trial status**

10 Patient recruitment was initiated on March 10<sup>th</sup> 2020. On the submission date of this  
11 article, no patients had been enrolled yet. Due to the COVID-19 outbreak, the study  
12 has been temporarily discontinued. Recruitment will be resumed as soon as possible.

### 13 **Authors' contributions**

14 JdM, BS, MB, SL, CM, EW and RD were all involved in the design of the study and in  
15 writing the manuscript.

16 Pvd, HV and AW critically reviewed the design of the study providing additional  
17 comments and suggestions.

### 18 **Funding statement**

19 This work was supported by the Dutch Cancer Foundation (project no. UU 2015-  
20 7891), Center for Translational Molecular Medicine (CTMM) in the projects  
21 VOLTAVALO (project no. 09P-106) and HIFU-chem (project no. 03O-301) and by  
22 "Friends of the UMC Utrecht".

## 1 **Acknowledgements**

2 We thank Roelien Kronemeijer of the trial bureau medical oncology and Heleen Klein  
3 Wolterink-Blok, research nurse medical oncology, for their work leading up to the  
4 institutional review board (IRB) approval of the study and the start of patient  
5 recruitment.

6 We thank Gert Storm for his work in the preceding HIFU-CHEM project that has  
7 contributed to the current project.

8 We thank Christiaan van Kesteren for his help with the design of Figure 1.

9 We thank Celsion Corporation for their support relating the use and safety of  
10 ThermoDox and their input during the design of the study.

11 Finally, we thank Profound Medical for their support relating the use and safety of the  
12 MR-HIFU breast system in their role as legal manufacturer of this investigational  
13 medical device.

## 14 **Competing interests statement**

15 The authors have no competing interest to declare.

## 16 **List of abbreviations**

|    |      |                                           |
|----|------|-------------------------------------------|
| 17 | AC   | Doxorubicin (A) and cyclophosphamide (C)  |
| 18 | AF   | Alkaline Phosphatase                      |
| 19 | ALAT | Alanine Transaminase                      |
| 20 | ANC  | Absolute Neutrophil Count                 |
| 21 | ASAT | Aspartate Transaminase                    |
| 22 | CTSQ | Cancer Therapy Satisfaction Questionnaire |

|    |    |               |                                                                 |
|----|----|---------------|-----------------------------------------------------------------|
| 1  |    |               |                                                                 |
| 2  |    |               |                                                                 |
| 3  | 1  | DCE           | Dynamic contrast-enhanced                                       |
| 4  |    |               |                                                                 |
| 5  |    |               |                                                                 |
| 6  | 2  | DLT           | Dose Limiting Toxicity                                          |
| 7  |    |               |                                                                 |
| 8  |    |               |                                                                 |
| 9  | 3  | FACT-B        | Functional Assessment of Cancer Therapy – Breast                |
| 10 |    |               |                                                                 |
| 11 | 4  | LTLT          | Lyso-Thermosensitive Liposomal Doxorubicin                      |
| 12 |    |               |                                                                 |
| 13 |    |               |                                                                 |
| 14 | 5  | MR-HIFU       | Magnetic Resonance guided High Intensity Focused Ultrasound     |
| 15 |    |               |                                                                 |
| 16 | 6  | MRI           | Magnetic Resonance Imaging                                      |
| 17 |    |               |                                                                 |
| 18 |    |               |                                                                 |
| 19 | 7  | (FDG-) PET/CT | <sup>18</sup> F-Fluorodeoxyglucose Positron Emission Tomography |
| 20 |    |               |                                                                 |
| 21 |    |               |                                                                 |
| 22 | 8  |               | combined with Computed Tomography                               |
| 23 |    |               |                                                                 |
| 24 | 9  | PICC          | Peripherally inserted central catheter                          |
| 25 |    |               |                                                                 |
| 26 |    |               |                                                                 |
| 27 | 10 | RFA           | Radiofrequency ablation                                         |
| 28 |    |               |                                                                 |
| 29 |    |               |                                                                 |
| 30 | 11 |               |                                                                 |
| 31 |    |               |                                                                 |
| 32 |    |               |                                                                 |
| 33 |    |               |                                                                 |
| 34 |    |               |                                                                 |
| 35 |    |               |                                                                 |
| 36 |    |               |                                                                 |
| 37 |    |               |                                                                 |
| 38 |    |               |                                                                 |
| 39 |    |               |                                                                 |
| 40 |    |               |                                                                 |
| 41 |    |               |                                                                 |
| 42 |    |               |                                                                 |
| 43 |    |               |                                                                 |
| 44 |    |               |                                                                 |
| 45 |    |               |                                                                 |
| 46 |    |               |                                                                 |
| 47 |    |               |                                                                 |
| 48 |    |               |                                                                 |
| 49 |    |               |                                                                 |
| 50 |    |               |                                                                 |
| 51 |    |               |                                                                 |
| 52 |    |               |                                                                 |
| 53 |    |               |                                                                 |
| 54 |    |               |                                                                 |
| 55 |    |               |                                                                 |
| 56 |    |               |                                                                 |
| 57 |    |               |                                                                 |
| 58 |    |               |                                                                 |
| 59 |    |               |                                                                 |
| 60 |    |               |                                                                 |

## 1 References

1. van Ramshorst MS, van der Voort A, van Werkhoven ED, et al. Neoadjuvant chemotherapy with or without anthracyclines in the presence of dual HER2 blockade for HER2-positive breast cancer (TRAIN-2): a multicentre, open-label, randomised, phase 3 trial. *The Lancet Oncology* 2018;19(12):1630-40.
2. Ponce AM, Viglianti BL, Yu D, et al. Magnetic resonance imaging of temperature-sensitive liposome release: drug dose painting and antitumor effects. *J Natl Cancer Inst* 2007;99(1):53-63.
3. Koechli OR, Sevin B, Perras JP, et al. Comparative chemosensitivity profiles in three human breast cancer cell lines with the ATP-cell viability assay. *Oncology* 1995;51:552-8.
4. Khan SA. Surgical Management of de novo Stage IV Breast Cancer. *Semin Radiat Oncol* 2016;26(1):79-86.
5. Headon H, Wazir U, Kasem A, et al. Surgical treatment of the primary tumour improves the overall survival in patients with metastatic breast cancer: A systematic review and meta-analysis. *Mol Clin Oncol* 2016;4(5):863-7.
6. Badwe R, Hawaldar R, Nair N, et al. Locoregional treatment versus no treatment of the primary tumour in metastatic breast cancer: an open-label randomised controlled trial. *Lancet Oncol* 2015;16(13):1380-8.
7. Soran A, Ozmen V, Ozbas S, et al. The importance of primary surgery in patients with de novo stage IV breast cancer; finalizing the protocol MF07-01 randomized clinical trial. . *Poster P1-20-01 at San Antonio Breast Cancer Symposium 2019* 2019.
8. Al-Jamal WT, Al-Ahmady ZS, Kostarelos K. Pharmacokinetics & tissue distribution of temperature-sensitive liposomal doxorubicin in tumor-bearing mice triggered with mild hyperthermia. *Biomaterials* 2012;33(18):4608-17.
9. Needham D, Anyarambhatla G, Kong G, et al. A new temperature-sensitive liposome for use with mild hyperthermia: characterization and testing in a human tumor xenograft model. *Cancer Res* 2000;60:1197-201.
10. Needham D, Dewhirst MW. The development and testing of a new temperature-sensitive drug delivery system for the treatment of solid tumors. *Adv Drug Deliv Rev* 2001;53:285-305.
11. Kong G, Anyarambhatla G, Petros WP, et al. Efficacy of Liposomes and Hyperthermia in a Human Tumor Xenograft Model: Importance of Triggered Drug Release. *Cancer Res* 2000;60:6950-7.
12. Ranjan A, Jacobs GC, Woods DL, et al. Image-guided drug delivery with magnetic resonance guided high intensity focused ultrasound and temperature sensitive liposomes in a rabbit Vx2 tumor model. *J Control Release* 2012;158(3):487-94.
13. Staruch RM, Ganguly M, Tannock IF, et al. Enhanced drug delivery in rabbit VX2 tumours using thermosensitive liposomes and MRI-controlled focused ultrasound hyperthermia. *Int J Hyperthermia* 2012;28(8):776-87.
14. de Smet M, Hijnen NM, Langereis S, et al. Magnetic Resonance Guided High-Intensity Focused Ultrasound Mediated Hyperthermia Improves the Intratumoral Distribution of Temperature-Sensitive Liposomal Doxorubicin. *Invest Radiol* 2013;48:395-405.
15. Li L, ten Hagen TL, Hossann M, et al. Mild hyperthermia triggered doxorubicin release from optimized stealth thermosensitive liposomes improves intratumoral drug delivery and efficacy. *J Control Release* 2013;168(2):142-50.

- 1 16. Kim YS, Keserci B, Partanen A, et al. Volumetric MR-HIFU ablation of uterine  
2 fibroids: role of treatment cell size in the improvement of energy efficiency. *Eur J Radiol*  
3 2012;81(11):3652-9.
- 4 17. Hurwitz MD, Ghanouni P, Kanaev SV, et al. Magnetic resonance-guided focused  
5 ultrasound for patients with painful bone metastases: phase III trial results. *J Natl Cancer*  
6 *Inst* 2014;106(5).
- 7 18. Hsiao YH, Kuo SJ, Tsai HD, et al. Clinical Application of High-intensity Focused  
8 Ultrasound in Cancer Therapy. *J Cancer* 2016;7(3):225-31.
- 9 19. Chu W, Staruch RM, Pichardo S, et al. Magnetic Resonance-Guided High-Intensity  
10 Focused Ultrasound Hyperthermia for Recurrent Rectal Cancer: MR Thermometry  
11 Evaluation and Preclinical Validation. *Int J Radiat Oncol Biol Phys* 2016;95(4):1259-67.
- 12 20. Bing C, Patel P, Staruch RM, et al. Longer heating duration increases localized  
13 doxorubicin deposition and therapeutic index in Vx2 tumors using MR-HIFU mild  
14 hyperthermia and thermosensitive liposomal doxorubicin. *Int J Hyperthermia*  
15 2019;36(1):196-203.
- 16 21. Zhu L, Partanen A, Talcott MR, et al. Feasibility and safety assessment of magnetic  
17 resonance-guided high-intensity focused ultrasound (MRgHIFU)-mediated mild  
18 hyperthermia in pelvic targets evaluated using an in vivo porcine model. *Int J*  
19 *Hyperthermia* 2019;36(1):1147-59.
- 20 22. Deckers R, Rome C, Moonen CT. The role of ultrasound and magnetic resonance in  
21 local drug delivery. *J Magn Reson Imaging* 2008;27(2):400-9.
- 22 23. Merckel LG, Bartels LW, Kohler MO, et al. MR-guided high-intensity focused  
23 ultrasound ablation of breast cancer with a dedicated breast platform. *Cardiovasc*  
24 *Intervent Radiol* 2013;36(2):292-301.
- 25 24. Deckers R, Merckel LG, Denis de Senneville B, et al. Performance analysis of a  
26 dedicated breast MR-HIFU system for tumor ablation in breast cancer patients. *Phys Med*  
27 *Biol* 2015;60(14):5527-42.
- 28 25. Merckel LG, Knuttel FM, Deckers R, et al. First clinical experience with a dedicated  
29 MRI-guided high-intensity focused ultrasound system for breast cancer ablation. *Eur*  
30 *Radiol* 2016;26(11):4037-46.
- 31 26. Zagar TM, Vujaskovic Z, Formenti S, et al. Two phase I dose-  
32 escalation/pharmacokinetics studies of low temperature liposomal doxorubicin (LTLTD)  
33 and mild local hyperthermia in heavily pretreated patients with local regionally  
34 recurrent breast cancer. *Int J Hyperthermia* 2014;30(5):285-94.
- 35 27. Poon RT, Borys N. Lyso-thermosensitive liposomal doxorubicin: an adjuvant to  
36 increase the cure rate of radiofrequency ablation in liver cancer. *Future Oncol*  
37 2011;7(8):937-45.
- 38 28. Tak WY, Lin SM, Wang Y, et al. Phase III HEAT Study Adding Lyso-  
39 Thermosensitive Liposomal Doxorubicin to Radiofrequency Ablation in Patients with  
40 Unresectable Hepatocellular Carcinoma Lesions. *Clin Cancer Res* 2018;24(1):73-83.
- 41 29. Lyon PC, Gray MD, Mannaris C, et al. Safety and feasibility of ultrasound-triggered  
42 targeted drug delivery of doxorubicin from thermosensitive liposomes in liver tumours  
43 (TARDOX): a single-centre, open-label, phase 1 trial. *Lancet Oncol* 2018;19(8):1027-39.
- 44 30. Gray MD, Lyon PC, Mannaris C, et al. Focused Ultrasound Hyperthermia for  
45 Targeted Drug Release from Thermosensitive Liposomes: Results from a Phase I Trial.  
46 *Radiology* 2019;291(1):232-8.
- 47 31. van Breugel JM, Wijlemans JW, Vaessen HH, et al. Procedural sedation and  
48 analgesia for respiratory-gated MR-HIFU in the liver: a feasibility study. *J Ther*  
49 *Ultrasound* 2016;4:19.

- 1  
2  
3 1 32. Ishihara Y, Calderon A, Watanabe H, et al. A precise and fast temperature  
4 2 mapping using water proton chemical shift. *MRM* 1995;34:814-23.  
5 3  
6 3 33. de Poorter J. Noninvasive MRI thermometry with the proton resonance frequency  
7 4 method: study of susceptibility effects. *MRM* 1995;34:359-67.  
8 5  
9 6 34. Brady MJ, Cella DF, Mo F, et al. Reliability and Validity of the Functional  
10 7 Assessment of Cancer Therapy-Breast Quality-of-Life Instrument. *J Clin Oncol*  
11 8 1997;15:974-86.  
12 9  
13 8 35. Abetz L, Coombs JH, Keininger DL, et al. Development of the cancer therapy  
14 10 satisfaction questionnaire: item generation and content validity testing. *Value Health*  
15 11 2005;8 Suppl 1:S41-53.  
16 12  
17 11 36. Cheung K, de Mol M, Visser S, et al. Reliability and validity of the Cancer Therapy  
18 12 Satisfaction Questionnaire in lung cancer. *Qual Life Res* 2016;25(1):71-80.  
19 13  
20 13 37. Eisenhauer EA, Therasse P, Bogaerts J, et al. New response evaluation criteria in  
21 14 solid tumours: revised RECIST guideline (version 1.1). *Eur J Cancer* 2009;45(2):228-47.  
22 15  
23 15 38. Wahl RL, Jacene H, Kasamon Y, et al. From RECIST to PERCIST: Evolving  
24 16 Considerations for PET response criteria in solid tumors. *J Nucl Med* 2009;50 Suppl  
25 17 1:122S-50S.  
26 18  
27 18 39. Chan S, Davidson N, Juozaityte E, et al. Phase III trial of liposomal doxorubicin and  
28 19 cyclophosphamide compared with epirubicin and cyclophosphamide as first-line  
29 20 therapy for metastatic breast cancer. *Ann Oncol* 2004;15(10):1527-34.  
30 21  
31 21 40. Celsion Corporation. ThermoDox®, Lyso-Thermosensitive Liposomal  
32 22 Doxorubicin (LTLTD), Investigator's Brochure. 2019.  
33 23  
34 23 41. Wood BJ, Poon RT, Locklin JK, et al. Phase I study of heat-deployed liposomal  
35 24 doxorubicin during radiofrequency ablation for hepatic malignancies. *J Vasc Interv*  
36 25 *Radiol* 2012;23(2):248-55 e7.  
37 26  
38 26 42. Gabizon A, Catane R, Uziely B, et al. Prolonged circulation time and enhanced  
39 27 accumulation in malignant exudates of doxorubicin encapsulated in polyethylene-glycol  
40 28 coated liposomes. *Cancer Res* 1994;54(4):987-92.  
41 29  
42 29 43. Swenson CE, Bolcsak LE, Batist G, et al. Pharmacokinetics of doxorubicin  
43 30 administered i.v. as Myocet (TLC D-99; liposome-encapsulated doxorubicin citrate)  
44 31 compared with conventional doxorubicin when given in combination with  
45 32 cyclophosphamide in patients with metastatic breast cancer. *Anticancer Drugs*  
46 33 2003;14(3):239-46.  
47 34  
48 34 44. Joerger M, Huitema ADR, Richel DJ, et al. Population pharmacokinetics and  
49 35 pharmacodynamics of doxorubicin and cyclophosphamide in breast cancer patients. *Clin*  
50 36 *Pharmacokinet* 2007;46(12):1051-68.  
51 37  
52 37 45. Jacquet JM, Bressolle F, Galtier M, et al. Doxorubicin and doxorubicinol: intra- and  
53 38 inter-individual variations of pharmacokinetic parameters. *Cancer Chemother Pharmacol*  
54 39 1990;27(3):219-25.  
55 40  
56 40 46. Callies S, de Alwis DP, Wright JG, et al. A population pharmacokinetic model for  
57 41 doxorubicin and doxorubicinol in the presence of a novel MDR modulator, zosuquidar  
58 42 trihydrochloride (LY335979). *Cancer Chemother Pharmacol* 2003;51(2):107-18.  
59 43  
60 43 47. Joerger M, Huitema AD, Meenhorst PL, et al. Pharmacokinetics of low-dose  
doxorubicin and metabolites in patients with AIDS-related Kaposi sarcoma. *Cancer  
Chemother Pharmacol* 2005;55(5):488-96.

1 **Figures and tables**

2 Figure 1 LTLD combined with MR-HIFU hyperthermia on the MR-HIFU breast system.

3

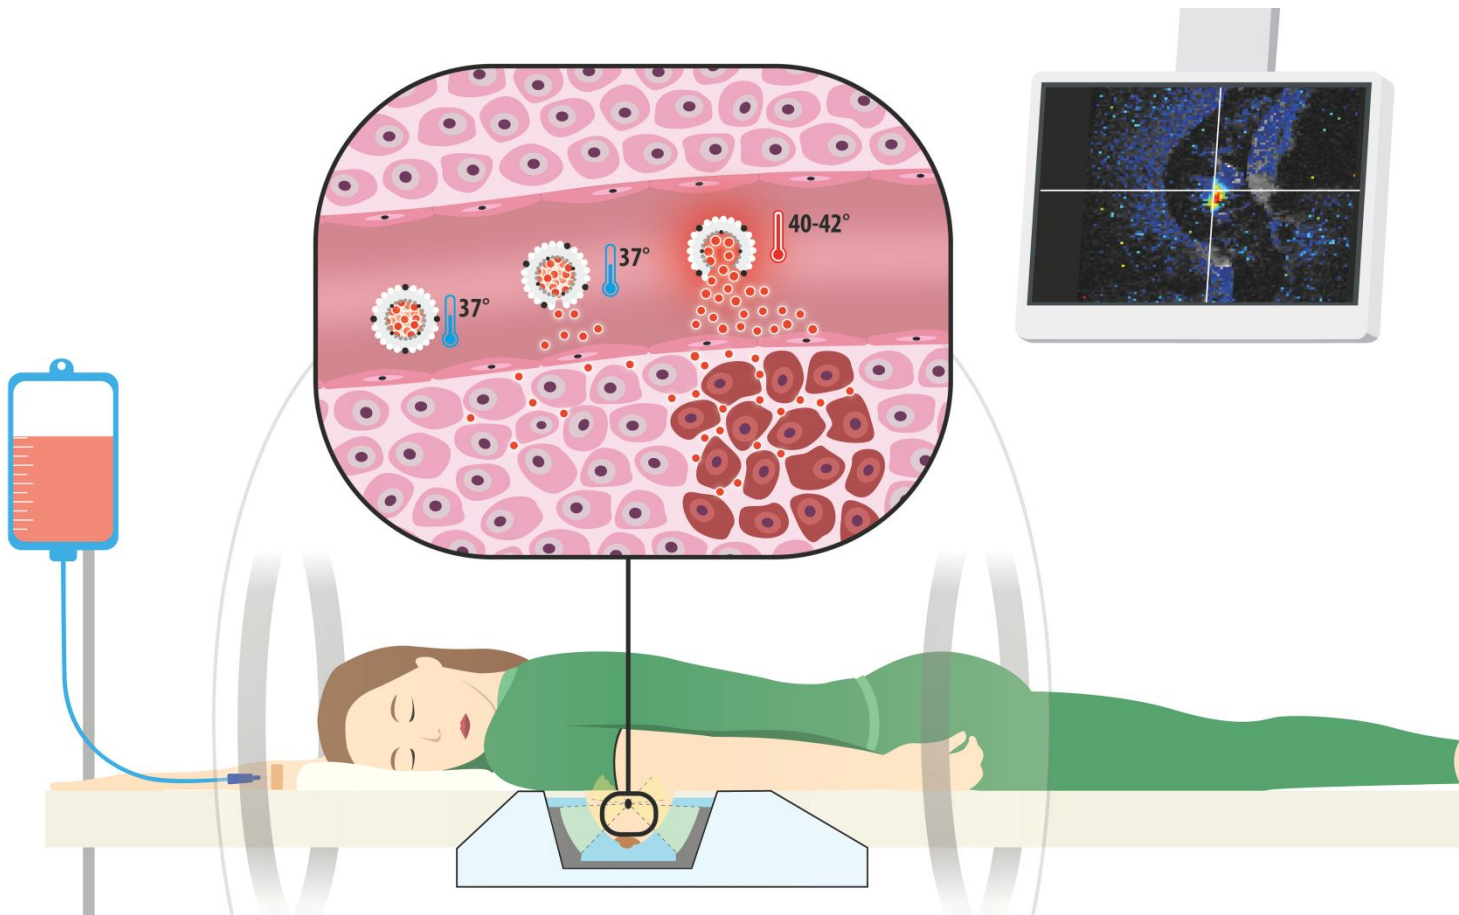

4

5

6

7

8

9

10



1 Figure 2 Study procedures

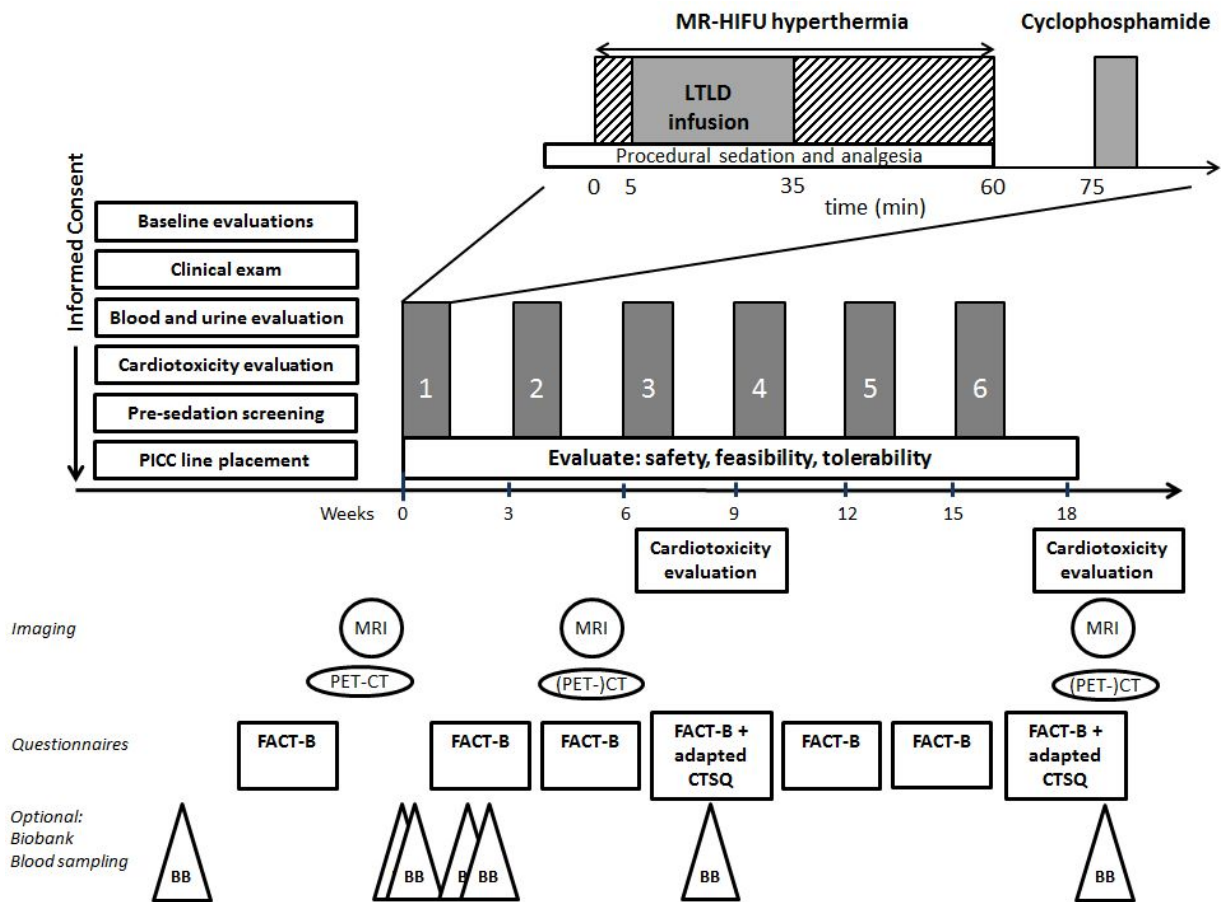

2

3

## 1 Table 1 Definitions of Dose Limiting Toxicity

| <b>Dose limiting systemic toxicity</b>      |                                                                                                                                                                                                                                                                                                                                                                                                                                                                                              |
|---------------------------------------------|----------------------------------------------------------------------------------------------------------------------------------------------------------------------------------------------------------------------------------------------------------------------------------------------------------------------------------------------------------------------------------------------------------------------------------------------------------------------------------------------|
| A                                           | <i>Hematologic DLT</i><br>defined as Grade 3 anaemia, Grade 4 thrombocytopenia, febrile neutropenia, or Grade 4 neutropenia $\geq 7$ days in duration.                                                                                                                                                                                                                                                                                                                                       |
| B                                           | <i>Non-hematologic DLT (non-loco-regional)</i><br>defined as Grade 3 or greater toxicity with the exceptions of alopecia, fatigue, nausea or vomiting and loco-regional effects.<br>Including Cardiotoxicity DLT, defined as: <ul style="list-style-type: none"> <li>• Grade 3 or greater cardiac disorders OR</li> <li>• a decline in LVEF of <math>&gt; 15\%</math> while the LVEF remains <math>&gt; 40\%</math> OR</li> <li>• a decline to an LVEF of <math>\leq 40\%</math>.</li> </ul> |
| <b>Dose limiting loco-regional toxicity</b> |                                                                                                                                                                                                                                                                                                                                                                                                                                                                                              |
| C                                           | <i>Loco-regional DLT</i><br>defined as post-procedural effects (e.g. pain or skin effects) on the treated breast warranting dose adjustment or delay.                                                                                                                                                                                                                                                                                                                                        |

2

1  
2  
3  
4  
5  
6  
7  
8  
9  
10  
11  
12  
13  
14  
15  
16  
17  
18  
19  
20  
21  
22  
23  
24  
25  
26  
27  
28  
29  
30  
31  
32  
33  
34  
35  
36  
37  
38  
39  
40  
41  
42  
43  
44  
45  
46  
47  
48  
49  
50  
51  
52  
53  
54  
55  
56  
57  
58  
59  
60

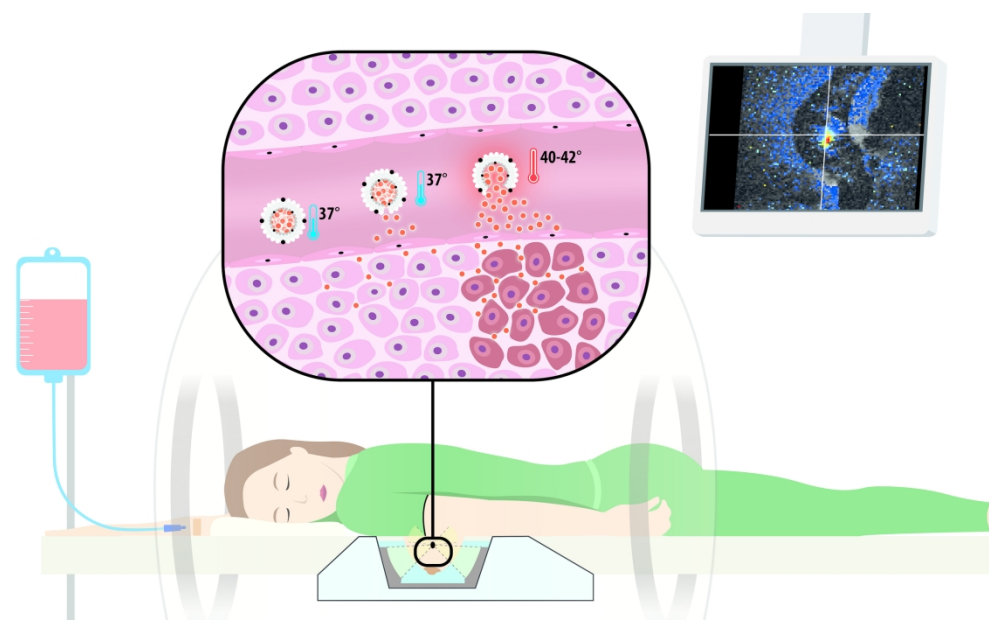

Figure 1 LTLD combined with MR-HIFU hyperthermia on the MR-HIFU breast system.

209x127mm (300 x 300 DPI)

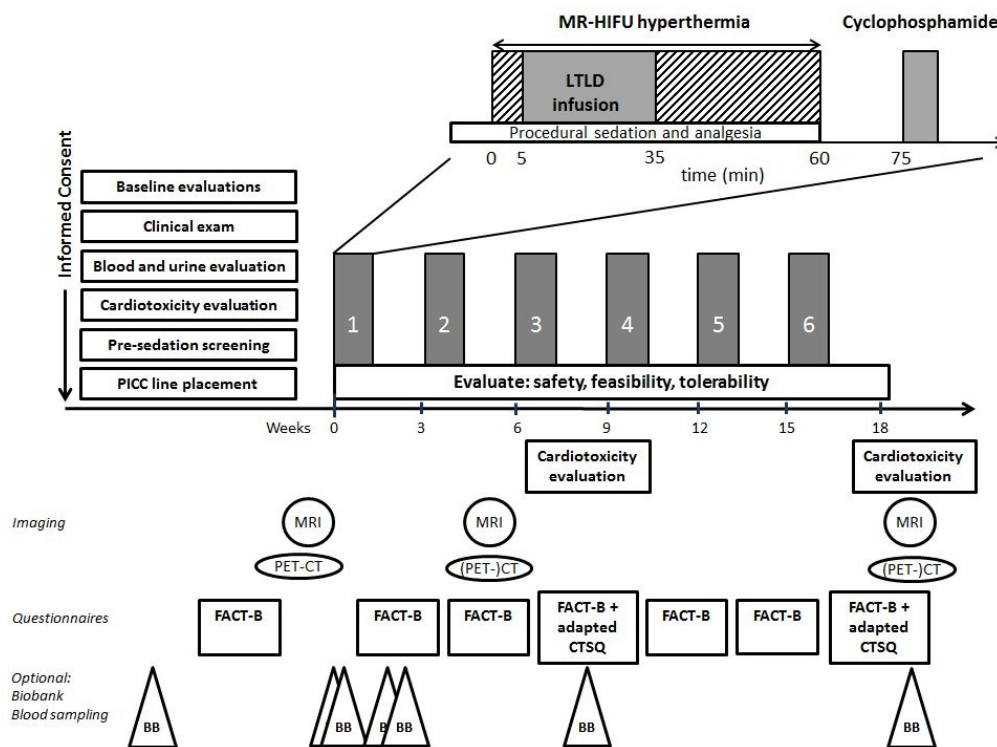

Figure 2 Study procedures

252x188mm (96 x 96 DPI)

1  
2  
3  
4  
5  
6  
7  
8  
9  
10  
11  
12  
13  
14  
15  
16  
17  
18  
19  
20  
21  
22  
23  
24  
25  
26  
27  
28  
29  
30  
31  
32  
33  
34  
35  
36  
37  
38  
39  
40  
41  
42  
43  
44  
45  
46

**Supplementary materials:**

**Supplement 1 Flow-chart interim analysis**

**Supplement 2 Comparison of AUC<sub>0-∞</sub> of free doxorubicin for LTLD and conventional doxorubicin.**

For peer review only

**Supplement 1 Flow-chart interim analysis**

1  
2  
3  
4  
5  
6  
7  
8  
9  
10  
11  
12  
13  
14  
15  
16  
17  
18  
19  
20  
21  
22  
23  
24  
25  
26  
27  
28  
29  
30  
31  
32  
33  
34  
35  
36  
37  
38  
39  
40  
41  
42  
43  
44  
45  
46

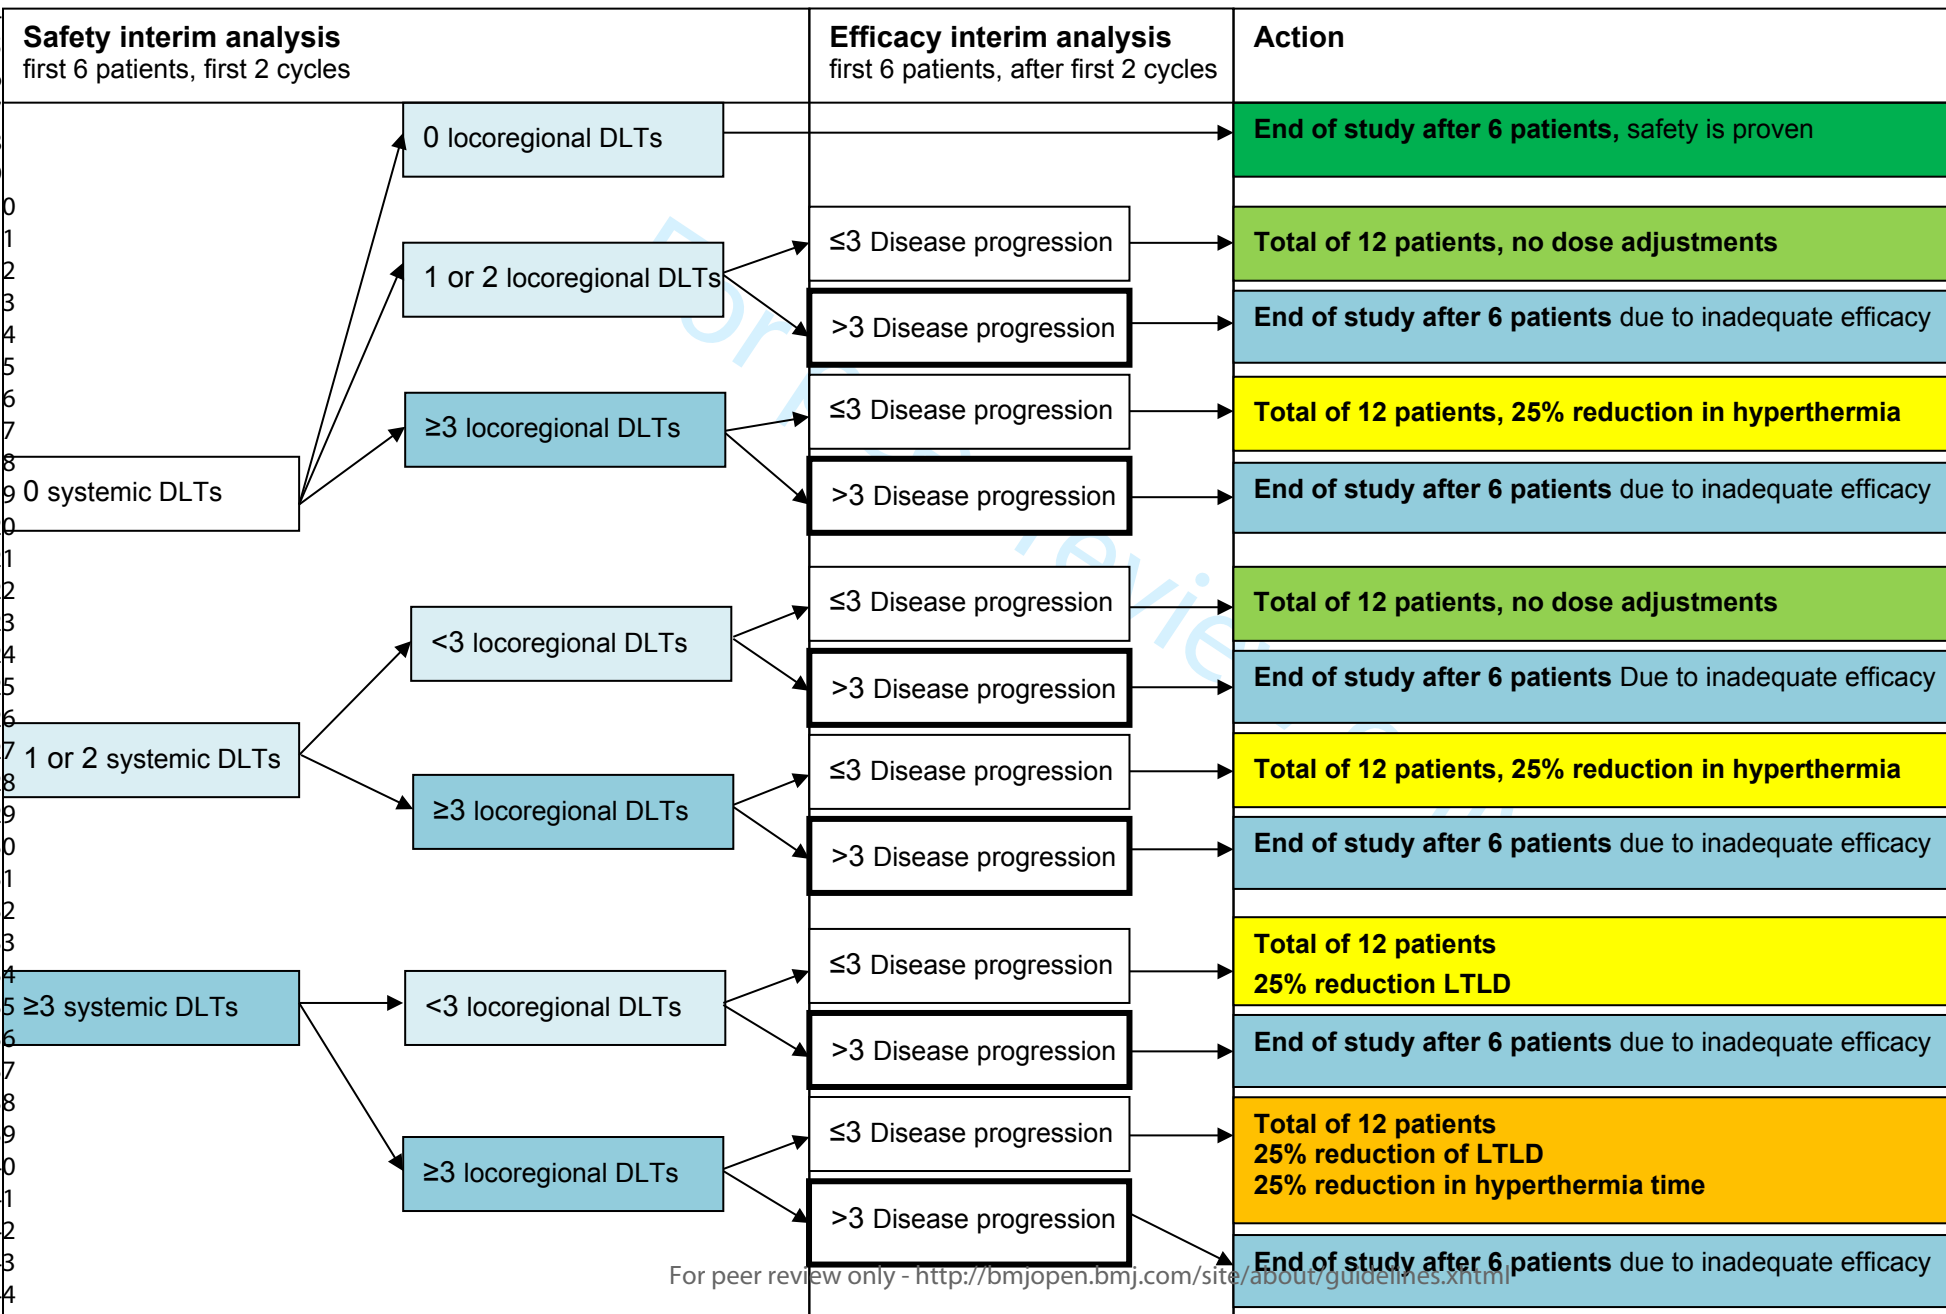

## Supplement 2 Comparison of AUC<sub>0-∞</sub> of free doxorubicin for LTLD and conventional doxorubicin.

In order to obtain a systemic dose of free doxorubicin (due to leakage of LTLD at 37 °C) that is as similar to conventional doxorubicin at 60 mg/m<sup>2</sup> (which is the standard of care treatment for the patients that will be enrolled in this study) as possible (to avoid undertreatment) we will start at the dose of 50 mg/m<sup>2</sup> LTLD, and we will apply dose adjustments when necessary. To compare the systemic dose of free doxorubicin after LTLD plus hyperthermia to the systemic dose of conventional doxorubicin, we summarized the pharmacokinetic data of the three studies with LTLD in which total plasma doxorubicin and the metabolite doxorubicinol were measured with a validated assay (studies 104-03-101 [1], 104-06-101 [2], and IND #174,188 [3]). In these studies the Area Under the Curve from t=0 to infinity (AUC<sub>0-∞</sub>) of the metabolite doxorubicinol was measured. Note that in these studies LTLD was administered with hyperthermia or RFA treatment. Pharmacokinetic data on LTLD without heating are not available. The mean values were converted to the AUC<sub>0-∞</sub> of 'free doxorubicin' based on the mean ratios between doxorubicinol and doxorubicin found in three studies (0.3826, 0.47 and 0.514 respectively, with a mean of 0.456) [4-6]. We compared these AUC<sub>0-∞</sub> values of 'free doxorubicin' from the LTLD studies with the AUC<sub>0-∞</sub> values of doxorubicin in pharmacokinetic studies of conventional doxorubicin [7-9]. Figure S2 displays the AUC<sub>0-∞</sub> of three studies with conventional doxorubicin (actual doxorubicin values are portrayed) and the AUC<sub>0-∞</sub> of three studies with LTLD (calculated 'free doxorubicin' values are portrayed). The figure shows that the calculated 'free doxorubicin' after LTLD 50 mg/m<sup>2</sup> is at least equal to that of conventional doxorubicin at 60 mg/m<sup>2</sup>.

**Figure S2: Comparison of the AUC<sub>0-∞</sub> of "free" plasma doxorubicin for LTLD + heat (calculated based on doxorubicinol concentration) and conventional doxorubicin.**

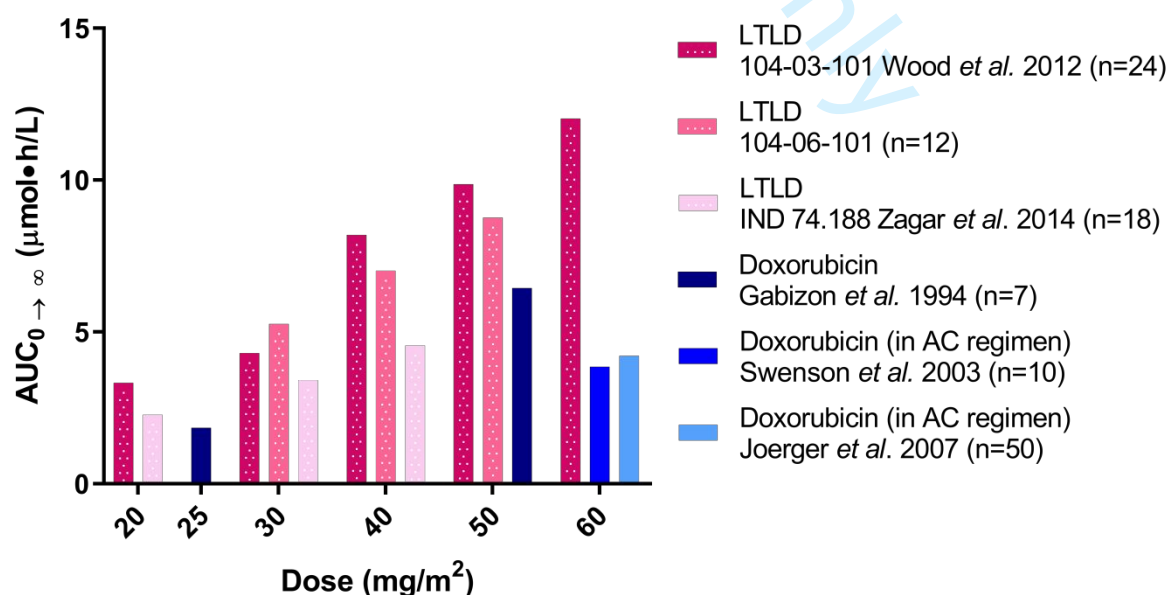

## Supplementary References

1. Wood BJ, Poon RT, Locklin JK, et al. Phase I study of heat-deployed liposomal doxorubicin during radiofrequency ablation for hepatic malignancies. *J Vasc Interv Radiol* 2012;23(2):248-55 e7.
2. Celsion Corporation. ThermoDox®, Lyso-Thermosensitive Liposomal Doxorubicin (LTLD), Investigator's Brochure. 2019.
3. Zagar TM, Vujaskovic Z, Formenti S, et al. Two phase I dose-escalation/pharmacokinetics studies of low temperature liposomal doxorubicin (LTLD) and mild local hyperthermia in heavily pretreated patients with local regionally recurrent breast cancer. *Int J Hyperthermia* 2014;30(5):285-94.
4. Jacquet JM, Bressolle F, Galtier M, et al. Doxorubicin and doxorubicinol: intra- and inter-individual variations of pharmacokinetic parameters. *Cancer Chemother Pharmacol* 1990;27(3):219-25.
5. Joerger M, Huitema AD, Meenhorst PL, et al. Pharmacokinetics of low-dose doxorubicin and metabolites in patients with AIDS-related Kaposi sarcoma. *Cancer Chemother Pharmacol* 2005;55(5):488-96.
6. Callies S, de Alwis DP, Wright JG, et al. A population pharmacokinetic model for doxorubicin and doxorubicinol in the presence of a novel MDR modulator, zosuquidar trihydrochloride (LY335979). *Cancer Chemother Pharmacol* 2003;51(2):107-18.
7. Gabizon A, Catane R, Uziely B, et al. Prolonged circulation time and enhanced accumulation in malignant exudates of doxorubicin encapsulated in polyethylene-glycol coated liposomes. *Cancer Res* 1994;54(4):987-92.
8. Swenson CE, Bolcsak LE, Batist G, et al. Pharmacokinetics of doxorubicin administered i.v. as Myocet (TLC D-99; liposome-encapsulated doxorubicin citrate) compared with conventional doxorubicin when given in combination with cyclophosphamide in patients with metastatic breast cancer. *Anticancer Drugs* 2003;14(3):239-46.
9. Joerger M, Huitema ADR, Richel DJ, et al. Population pharmacokinetics and pharmacodynamics of doxorubicin and cyclophosphamide in breast cancer patients. *Clin Pharmacokinet* 2007;46(12):1051-68.



1  
2  
3  
4  
5  
6  
7  
8  
9  
10  
11  
12  
13  
14  
15  
16  
17  
18  
19  
20  
21  
22  
23  
24  
25  
26  
27  
28  
29  
30  
31  
32  
33  
34  
35  
36  
37  
38  
39  
40  
41  
42  
43  
44  
45  
46  
47  
48  
49  
50  
51  
52  
53  
54  
55  
56  
57  
58  
59  
60

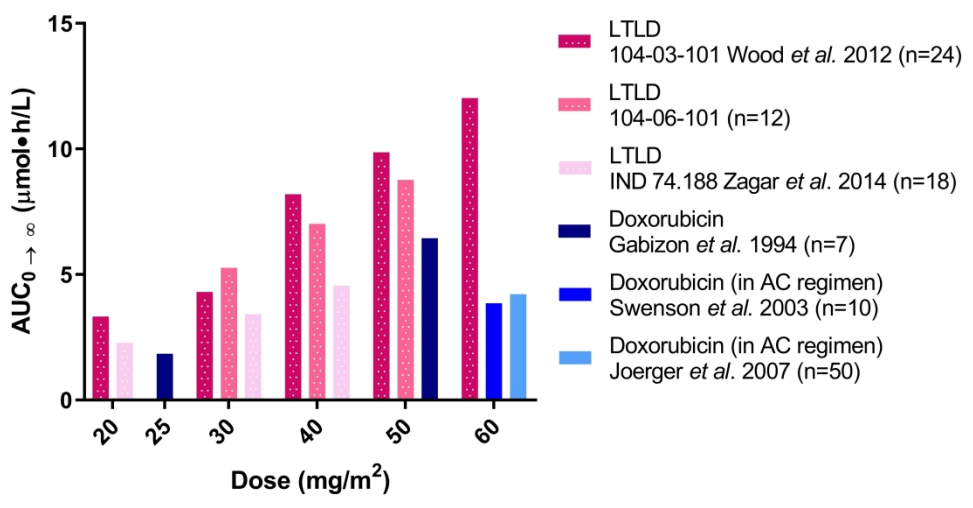

168x90mm (600 x 600 DPI)

# BMJ Open

**Study protocol of the i-GO study, a phase I feasibility study of Magnetic Resonance guided High-Intensity Focused Ultrasound-induced hyperthermia, Lyso-Thermosensitive Liposomal Doxorubicin and cyclophosphamide in de novo stage IV breast cancer patients.**

|                                 |                                                                                                                                                                                                                                                                                                                                                                                                                                                                                                                                                                                                                                                                                                                                                                                                                                                                                                                                                                                                                                                                                               |
|---------------------------------|-----------------------------------------------------------------------------------------------------------------------------------------------------------------------------------------------------------------------------------------------------------------------------------------------------------------------------------------------------------------------------------------------------------------------------------------------------------------------------------------------------------------------------------------------------------------------------------------------------------------------------------------------------------------------------------------------------------------------------------------------------------------------------------------------------------------------------------------------------------------------------------------------------------------------------------------------------------------------------------------------------------------------------------------------------------------------------------------------|
| Journal:                        | <i>BMJ Open</i>                                                                                                                                                                                                                                                                                                                                                                                                                                                                                                                                                                                                                                                                                                                                                                                                                                                                                                                                                                                                                                                                               |
| Manuscript ID                   | bmjopen-2020-040162.R1                                                                                                                                                                                                                                                                                                                                                                                                                                                                                                                                                                                                                                                                                                                                                                                                                                                                                                                                                                                                                                                                        |
| Article Type:                   | Protocol                                                                                                                                                                                                                                                                                                                                                                                                                                                                                                                                                                                                                                                                                                                                                                                                                                                                                                                                                                                                                                                                                      |
| Date Submitted by the Author:   | 21-Sep-2020                                                                                                                                                                                                                                                                                                                                                                                                                                                                                                                                                                                                                                                                                                                                                                                                                                                                                                                                                                                                                                                                                   |
| Complete List of Authors:       | de Maar, Josanne; UMC Utrecht, Division of Imaging & Oncology<br>Suelmann, Britt; University Medical Center Utrecht, Utrecht University, Division of Imaging & Oncology<br>Braat, Manon; University Medical Center Utrecht, Utrecht University, Division of Imaging & Oncology<br>van Diest, P.J.; University Medical Center Utrecht, Department of Pathology<br>Vaessen, H.H.B.; Universitair Medisch Centrum Utrecht, Anesthesiology<br>Witkamp, Arjen ; University Medical Center Utrecht, Utrecht University, Division of Imaging & Oncology<br>Linn, S. C.; Nederlands Kanker Instituut - Antoni van Leeuwenhoek Ziekenhuis, Department of Molecular Pathology, C2; University Medical Center Utrecht, Utrecht University, Division of Imaging & Oncology<br>Moonen, Chrit; University Medical Center Utrecht, Utrecht University, Division of Imaging & Oncology<br>van der Wall, Elsken; University Medical Center Utrecht, Utrecht University, Division of Imaging & Oncology<br>Deckers, Roel; University Medical Center Utrecht, Utrecht University, Division of Imaging & Oncology |
| <b>Primary Subject Heading</b>: | Oncology                                                                                                                                                                                                                                                                                                                                                                                                                                                                                                                                                                                                                                                                                                                                                                                                                                                                                                                                                                                                                                                                                      |
| Secondary Subject Heading:      | Radiology and imaging                                                                                                                                                                                                                                                                                                                                                                                                                                                                                                                                                                                                                                                                                                                                                                                                                                                                                                                                                                                                                                                                         |
| Keywords:                       | ONCOLOGY, Breast tumours < ONCOLOGY, Interventional radiology < RADIOLOGY & IMAGING, Magnetic resonance imaging < RADIOLOGY & IMAGING, Ultrasound < RADIOLOGY & IMAGING, CHEMOTHERAPY                                                                                                                                                                                                                                                                                                                                                                                                                                                                                                                                                                                                                                                                                                                                                                                                                                                                                                         |
|                                 |                                                                                                                                                                                                                                                                                                                                                                                                                                                                                                                                                                                                                                                                                                                                                                                                                                                                                                                                                                                                                                                                                               |

SCHOLARONE™  
Manuscripts

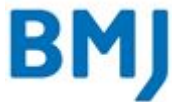

I, the Submitting Author has the right to grant and does grant on behalf of all authors of the Work (as defined in the below author licence), an exclusive licence and/or a non-exclusive licence for contributions from authors who are: i) UK Crown employees; ii) where BMJ has agreed a CC-BY licence shall apply, and/or iii) in accordance with the terms applicable for US Federal Government officers or employees acting as part of their official duties; on a worldwide, perpetual, irrevocable, royalty-free basis to BMJ Publishing Group Ltd ("BMJ") its licensees and where the relevant Journal is co-owned by BMJ to the co-owners of the Journal, to publish the Work in this journal and any other BMJ products and to exploit all rights, as set out in our [licence](#).

The Submitting Author accepts and understands that any supply made under these terms is made by BMJ to the Submitting Author unless you are acting as an employee on behalf of your employer or a postgraduate student of an affiliated institution which is paying any applicable article publishing charge ("APC") for Open Access articles. Where the Submitting Author wishes to make the Work available on an Open Access basis (and intends to pay the relevant APC), the terms of reuse of such Open Access shall be governed by a Creative Commons licence – details of these licences and which [Creative Commons](#) licence will apply to this Work are set out in our licence referred to above.

Other than as permitted in any relevant BMJ Author's Self Archiving Policies, I confirm this Work has not been accepted for publication elsewhere, is not being considered for publication elsewhere and does not duplicate material already published. I confirm all authors consent to publication of this Work and authorise the granting of this licence.

**1 Title**

2 Study protocol of the i-GO study, a phase I feasibility study of Magnetic Resonance  
3 guided High-Intensity Focused Ultrasound-induced hyperthermia, Lyso-  
4 Thermosensitive Liposomal Doxorubicin and cyclophosphamide in de novo stage IV  
5 breast cancer patients.

**7 Authors**

8 J.S. de Maar<sup>1</sup> (corresponding author) [J.S.deMaar@umcutrecht.nl](mailto:J.S.deMaar@umcutrecht.nl)  
9 B.B.M. Suelmann<sup>1</sup> [B.B.M.Suelmann@umcutrecht.nl](mailto:B.B.M.Suelmann@umcutrecht.nl)  
10 M.N.G.J.A. Braat<sup>1</sup> [M.N.G.Braat-3@umcutrecht.nl](mailto:M.N.G.Braat-3@umcutrecht.nl)  
11 P.J. van Diest<sup>1</sup> [P.J.vanDiest@umcutrecht.nl](mailto:P.J.vanDiest@umcutrecht.nl)  
12 H.H.B. Vaessen<sup>1</sup> [H.H.B.Vaessen@umcutrecht.nl](mailto:H.H.B.Vaessen@umcutrecht.nl)  
13 A. J. Witkamp<sup>1</sup> [A.J.Witkamp@umcutrecht.nl](mailto:A.J.Witkamp@umcutrecht.nl)  
14 S. Linn<sup>1, 2</sup> [s.linn@nki.nl](mailto:s.linn@nki.nl)  
15 C.T.W. Moonen<sup>1</sup> [C.Moonen@umcutrecht.nl](mailto:C.Moonen@umcutrecht.nl)  
16 E. van der Wall<sup>1</sup> [E.vanderWall@umcutrecht.nl](mailto:E.vanderWall@umcutrecht.nl)  
17 R. Deckers<sup>1</sup> [R.Deckers-2@umcutrecht.nl](mailto:R.Deckers-2@umcutrecht.nl)

**19 Institutional address**

20 1. University Medical Center Utrecht, Utrecht University  
21 Heidelberglaan 100, 3584 CX  
22 Huispostnummer Q 00.3.11, Postbus 85500,

1  
2  
3  
4  
5  
6  
7  
8  
9  
10  
11  
12  
13  
14  
15  
16  
17  
18  
19  
20  
21  
22  
23  
24  
25  
26  
27  
28  
29  
30  
31  
32  
33  
34  
35  
36  
37  
38  
39  
40  
41  
42  
43  
44  
45  
46  
47  
48  
49  
50  
51  
52  
53  
54  
55  
56  
57  
58  
59  
60

- 1 Utrecht, The Netherlands
- 2 2. Netherlands Cancer Institute - Antoni van Leeuwenhoek hospital,
- 3 Plesmanlaan 121, 1066 CX
- 4 Postbus 90203, 1006 BE
- 5 Amsterdam, The Netherlands

For peer review only

## 1 **Abstract**

### 2 **Introduction**

3 In breast cancer, local tumour control is thought to be optimized by administering  
4 higher local levels of cytotoxic chemotherapy, in particular doxorubicin. However,  
5 systemic administration of higher dosages of doxorubicin is hampered by its toxic  
6 side effects. In this study, we aim to increase doxorubicin deposition in the primary  
7 breast tumour without changing systemic doxorubicin concentration and thus  
8 without interfering with systemic efficacy and toxicity. This is to be achieved by  
9 combining lyso-thermosensitive liposomal doxorubicin (LTLD, ThermoDox®, Celsion  
10 Corporation, Lawrenceville, NJ, USA) with mild local hyperthermia, induced by  
11 Magnetic Resonance guided High Intensity Focused Ultrasound (MR-HIFU). When  
12 heated above 39.5 °C, LTLD releases a high concentration of doxorubicin  
13 intravascularly within seconds. In absence of hyperthermia, LTLD leads to a similar  
14 biodistribution and antitumour efficacy compared to conventional doxorubicin.

### 15 **Methods and analysis**

16 This is a single-arm phase I study in 12 chemotherapy-naïve patients with *de novo*  
17 stage IV HER2-negative breast cancer. Previous endocrine treatment is allowed. Study  
18 treatment consists of up to 6 cycles of LTLD at 21-day intervals, administered during  
19 MR-HIFU induced hyperthermia to the primary tumour. We will aim for 60 minutes of  
20 hyperthermia at 40-42 °C using a dedicated MR-HIFU breast system (Profound  
21 Medical, Mississauga, Canada). Afterwards, intravenous cyclophosphamide will be

1 administered. Primary endpoints are safety, tolerability and feasibility. The secondary  
2 endpoint is efficacy, assessed by radiological response.

3 This approach could lead to optimal loco-regional control with less extensive or even  
4 no surgery, in *de novo* stage IV patients and in stage II/III patients allocated to receive  
5 neo-adjuvant chemotherapy.

### 6 **Ethics and dissemination**

7 This study has obtained ethical approval by the Medical Research Ethics Committee  
8 Utrecht (Protocol NL67422.041.18, METC number 18-702). Informed consent will be  
9 obtained from all patients before study participation. Results will be published in an  
10 academic peer-reviewed journal.

### 11 **Trial registration number**

12 NCT03749850, EudraCT 2015-005582-23.

### 14 **Keywords**

15 High Intensity Focused Ultrasound,  
16 MR-HIFU  
17 ThermoDox  
18 Lyso-thermosensitive liposomal doxorubicin (LTLD)  
19 Temperature sensitive liposome  
20 Targeted drug delivery  
21 Hyperthermia  
22 Image-guided therapy

- 1 De novo stage IV breast cancer
- 2 Synchronous stage IV breast cancer
- 3 Metastatic breast cancer

#### 5 **Strengths and limitations**

- 6 • This first in human clinical trial investigates the combination of Lyso-  
7 Thermosensitive Liposomal Doxorubicin and Magnetic Resonance guided High  
8 Intensity Focused Ultrasound induced hyperthermia in breast cancer patients.
- 9 • A dedicated MR-HIFU breast system with real-time MR temperature feedback  
10 will be used for safe non-invasive local hyperthermia treatment of breast  
11 tumours.
- 12 • Because the study population consists of patients with *de novo* stage IV breast  
13 cancer, both local and systemic response to the treatment can be monitored.
- 14 • A survival benefit of treating the primary tumour in patients with metastatic  
15 breast cancer has not been proven, therefore study participants will participate  
16 altruistically in the interest of future patients.
- 17 • This approach could lead to improved local control during palliative  
18 chemotherapy in *de novo* stage IV breast cancer or neoadjuvant chemotherapy  
19 in stage II/III disease, with less extensive or even no surgery.



## 1 Introduction

2 Both neo-adjuvant and adjuvant chemotherapy of breast cancer aim to improve  
3 survival by eradicating microscopic distant metastases. In addition, neo-adjuvant  
4 treatment offers the opportunity to observe the biological behaviour of the primary  
5 tumour and increase the likelihood of less extensive radical (breast conserving)  
6 surgery. Given the fact that pathological complete response (pCR) is achieved at best  
7 in 68% of patients [1], efforts should be focused on improving primary tumour  
8 response. This may be achieved by increasing the dose of chemotherapy at the site of  
9 the tumour. In pre-clinical data, a higher concentration of chemotherapy in the  
10 tumour is correlated with increased tumour response, in particular for doxorubicin,  
11 one of the most frequently applied cytostatics in breast cancer treatment [2-4].  
12 Clinically this was confirmed by studies using other chemotherapeutics, i.e. 5-  
13 fluorouracil and docetaxel. Higher tumour uptake of radio-active labelled 5-  
14 fluorouracil or docetaxel chemotherapy on PET was shown to correlate respectively  
15 with longer survival in patients with liver metastasis of colorectal carcinoma [5] and  
16 with better tumour response in lung cancer patients [6]. In a study comparing  
17 different dose schedules of the adjuvant AC regimen, the highest dosages (60mg/m<sup>2</sup>  
18 doxorubicin and 600mg/m<sup>2</sup> cyclophosphamide) were most effective, and this is  
19 currently the standard of care [7]. However, the administration of higher doses of  
20 doxorubicin is hampered by its systemic side effects. A randomized study evaluating  
21 even higher doxorubicin dosages (60mg/m<sup>2</sup> versus 75mg/m<sup>2</sup> and 90 mg/m<sup>2</sup>) did not  
22 find a difference in disease-free or overall survival. However, the higher dose levels

1 did lead to significantly more dose reductions and delays, which could explain why  
2 the efficacy did not increase further [8]. In the i-GO study we aim to increase  
3 doxorubicin levels in the primary tumour, without interfering with systemic efficacy  
4 and toxicity, by combining lyso-thermosensitive liposomal doxorubicin (LTLD,  
5 ThermoDox®; Celsion Corporation, Lawrenceville, NJ, USA) with mild local  
6 hyperthermia, induced by Magnetic Resonance guided High Intensity Focused  
7 Ultrasound (MR-HIFU). This will be followed by the intravenous administration of a  
8 second cytostatic agent, cyclophosphamide. The combined administration of  
9 doxorubicin and cyclophosphamide (AC) is a well-known regimen in the standard of  
10 care treatment in both the (neo-) adjuvant setting as in the treatment of metastatic  
11 breast cancer.

12 The i-GO study will be a phase I feasibility study in stage IV breast cancer patients  
13 who present with distant metastases and a primary tumour in situ (*de novo* stage IV  
14 patients). Several studies have suggested that by obtaining loco-regional control in  
15 metastatic breast cancer, overall survival in advanced disease would be improved [9-  
16 11] However, randomized controlled trials have contradicted this [12, 13] A recent  
17 presentation at ASCO 2020 [14] confirmed that local treatment in addition to  
18 systemic therapy did not improve survival. As such, besides a personal preference of  
19 the patient and the possibility of preventing local morbidity, study participation will  
20 not have a benefit compared to the standard of care. However, based on  
21 pharmacokinetic studies (details outlined in Supplementary materials 1) we do expect  
22 at least an equally effective treatment. Study participants will participate altruistically

1 in the interest of future patients in the neoadjuvant setting. In the future, the  
2 combination of LTLD, MR-HIFU hyperthermia, and cyclophosphamide may lead to  
3 improved local control during neoadjuvant chemotherapy in stage II/III disease, with  
4 less extensive or even no surgery.

#### 5 Lyso-thermosensitive liposomal doxorubicin

6 LTLD is a temperature-sensitive liposomal encapsulation of doxorubicin. Doxorubicin  
7 is a cytotoxic (chemotherapy) agent that is approved and frequently used for the  
8 treatment of a wide range of cancers, including breast cancer. When heated to 40-42  
9 °C, LTLD releases the encapsulated doxorubicin intravascularly within seconds [15-17].  
10 (Figure 1.) In small animal tumour models, LTLD combined with hyperthermia results  
11 in a 3-25 fold higher tumour concentration than conventional doxorubicin [2, 18-22]  
12 and increased antitumour efficacy [2, 16, 18]. In the absence of hyperthermia,  
13 doxorubicin leaks slowly from the liposome, and after two hours all of the  
14 doxorubicin is released [15]. Furthermore, LTLD without hyperthermia leads to a  
15 similar biodistribution [19, 20] and antitumour efficacy [16, 18] compared to  
16 conventional doxorubicin.

#### 17 Magnetic resonance-guided high intensity focused ultrasound

18 MR-HIFU is a truly non-invasive treatment modality, that combines magnetic  
19 resonance imaging (MRI) and high intensity focused ultrasound to perform image-  
20 guided thermal tissue ablation (55-70 °C) [23-25] or mild local hyperthermia (40-43  
21 °C) [26-28]. Unlike other heating methods, using microwaves, radiofrequency or non-  
22 focused ultrasound, HIFU allows for non-invasive localized heating of deep-seated

1 tumours [29]. In addition to treatment planning based on anatomical MRI, MR-  
2 guidance can provide temperature feedback and control during hyperthermia  
3 treatment, through real-time MR thermometry. For this study we will use a dedicated  
4 MR-HIFU breast system: the Sonalleve MR-HIFU breast tumour therapy system  
5 (hereafter referred to as 'MR-HIFU breast system', Profound Medical, Mississauga,  
6 Canada), integrated with a clinical 1.5 Tesla MR scanner (Achieva, Philips Healthcare,  
7 Best, The Netherlands). This system has a lateral sonication approach, which enables  
8 specific heating of the breast tumour, while reducing the risk of heating the skin or  
9 other organs to a minimum [30]. A phase I study in our hospital with MR-HIFU  
10 ablation of breast tumours showed that the MR-HIFU breast system allows for safe,  
11 accurate and precise thermal ablation [31, 32].

## 12 Previous clinical studies

13 This will be the first-in-human study to evaluate LTLD with MR-HIFU hyperthermia in  
14 breast cancer patients. LTLD has been studied previously in combination with  
15 superficial hyperthermia in patients with chest wall recurrences of breast cancer [33].  
16 This phase I/II study showed that LTLD at 40 mg/m<sup>2</sup> with superficial hyperthermia was  
17 safe and the 48% overall response (14/29, 95% CI:30–66%) was promising in this  
18 heavily pre-treated population. A large randomized phase III study in 701 patients  
19 with hepatocellular carcinoma compared LTLD at 50 mg/m<sup>2</sup> with radiofrequency  
20 ablation (RFA) to RFA alone (the HEAT study) [34, 35]. In that study the primary  
21 endpoint of 33% improvement in progression free survival was not met. However, a  
22 post-hoc analysis in the subgroup of 285 patients with solitary lesions that were

1 treated with  $\geq 45$  min of RFA showed a significant overall survival benefit for the  
2 combination treatment (Hazard Ratio for Overall Survival 0.63 (95% CI, 0.41–0.96;  $P <$   
3 0.05), in favour of RFA+LTLD with  $\geq 45$  minutes heating). Systemic adverse events  
4 increased in the RFA+LTLD arm (83% vs 35% with RFA alone) as expected, with a  
5 similar profile to that of conventional doxorubicin [35].

6 Furthermore, the combination of LTLD and ultrasound guided HIFU hyperthermia has  
7 been evaluated in a phase I proof-of-concept study in ten patients with incurable  
8 primary or metastatic liver tumours (the TARDOX study) [36, 37]. Adverse events did  
9 not differ from those associated with doxorubicin alone and in the group of patients  
10 that underwent invasive thermometry sufficient mean tumour temperatures were  
11 measured. In seven out of ten patients, the intratumoural doxorubicin concentration  
12 doubled after HIFU, although a within-patient comparison was not possible for all  
13 patients. We aim to take advantage of the same principle to treat the primary tumour  
14 in patients presenting with metastatic breast cancer. Monitoring the treatment by MR  
15 thermometry may further enhance safety, efficacy and feasibility. Using multiple  
16 cycles of LTLD + MR-HIFU hyperthermia is expected to increase treatment efficacy  
17 and mimics the standard of care treatment.

## 18 **Methods and analysis**

19 This single-arm phase I feasibility study aims to determine the safety, tolerability and  
20 feasibility of the combination of LTLD, MR-HIFU induced mild local hyperthermia, and  
21 cyclophosphamide, for the enhanced local treatment of the primary tumour in  
22 patients presenting with metastatic breast cancer. All eligible participants will receive

1 up to 6 cycles of LTLD at 21-day intervals, administered during MR-HIFU induced  
2 hyperthermia to the primary tumour and cyclophosphamide administered afterwards.

### 3 Patient population

4 We will include 6 or 12 adult female patients with *de novo* stage IV (distant  
5 metastases at the time of diagnosis, with the primary tumour in situ) HER2-negative  
6 breast cancer, who have not received previous chemotherapy for their disease.  
7 Previous endocrine treatment in those with hormone-receptor positive disease is  
8 allowed. The small samples size was chosen because this is the first study evaluating  
9 the combination of MR-HIFU hyperthermia, LTLD and cyclophosphamide. No formal  
10 sample size calculation was performed. Potentially eligible patients will be referred to  
11 the department of Medical Oncology at the University Medical Center Utrecht, The  
12 Netherlands. In order to achieving adequate participant enrolment, medical  
13 oncologists in hospitals in the Netherlands will be asked to refer potentially eligible  
14 and interested patients.

### 15 Inclusion criteria

16 Patients must meet all of the following inclusion criteria:

- 17 • Histologically confirmed adenocarcinoma of the breast and planned for palliative  
18 chemotherapy with doxorubicin and cyclophosphamide.
- 19 • Biopsy-proven stage T1-2AnyNM1 at diagnosis of breast cancer.
- 20 • Measurable disease according to either RECIST 1.1 or PERCIST 1.0 at baseline.
- 21 • Non-pregnant, non-lactating female at least 18 years of age. If the patient is of  
22 child-bearing age, she must have a negative serum pregnancy test prior to enrolment and  
23 must agree to practice an acceptable form of birth control while on study.

- 1  
2  
3 1 • The tumour is located within the reach of the HIFU beam (based on pre-treatment  
4  
5 2 dynamic contrast-enhanced (DCE-) MRI findings).  
6  
7 3 • The distance of the tumour from the skin, nipple, and pectoral wall is at least 1.0 cm  
8  
9 (based on pre-treatment DCE-MRI findings).  
10 4  
11 5 • The target breast is expected to fit in the cup of the MR-HIFU breast system (based  
12  
13 on pre-treatment MRI findings).  
14 6  
15 7 • The patient is able to provide written informed consent and willing to comply with  
16  
17 8 protocol requirements.  
18  
19

### 20 21 Exclusion criteria

22  
23  
24 10 Patients will be excluded if any of the following conditions are observed:

- 25  
26 11 • HER2-positive disease or classic invasive lobular carcinoma (ILC).  
27  
28 12 • A treatment plan with curative intent is available.  
29  
30 13 • Any prior chemotherapy treatment for invasive breast cancer (previous anti-  
31  
32 hormonal therapy is allowed).  
33 14  
34 15 • Any prior therapy with anthracyclines.  
35  
36 16 • The patient weighs  $\geq 90$  kg (restriction of the HIFU table top).  
37  
38 17 • Any concomitant malignancy or previous malignancy in the last 5 years, except  
39  
40 basal cell or squamous cell cancer of the skin or in situ carcinoma of the cervix. Subjects with a  
41  
42 18 prior contralateral breast malignancy more than 5 years ago can be included if they did not  
43  
44 19 receive any chemotherapy.  
45  
46 20  
47 21 • Any previous malignancy in the unilateral breast (even if more than 5 years ago)  
48  
49 22 • Prior sensitivity (including rash, dyspnoea, wheezing, urticarial, or other symptoms)  
50  
51 23 attributed to any liposomal-encapsulated drug.  
52  
53 24 • Baseline laboratory values:  
54  
55 25 Absolute Neutrophil Count (ANC)  $< 1.5 \times 10^9/L$   
56  
57 26 Platelets  $< 75 \times 10^9/L$   
58  
59  
60

- 1  
2  
3 1 Haemoglobin < 5.6 mmol/L (transfusion is allowed)  
4  
5 2 Total Bilirubin > 1.5 times upper limit of normal  
6  
7 3 Alanine Transaminase (ALAT) and Aspartate Transaminase (ASAT)  
8  
9  
10 4 > 2.5 times upper limit of normal  
11  
12 5 >5 times upper limit of normal in case of liver  
13  
14 6 metastases  
15  
16 7 Estimated Glomerular Filtration Rate < 30 ml/min/1.73m<sup>2</sup>  
17  
18 8 • World Health Organization Performance Status (WHO-PS) >2.  
19  
20 9 • Left Ventricular Ejection Fraction <50% (validated by baseline scan).  
21  
22  
23 10 • History of: acute coronary syndrome in the last year, cerebral vascular accident in  
24  
25 11 the last year, abnormal cardiac stress testing within the last six months, symptomatic coronary  
26  
27 12 artery disease, uncontrolled hypertension or cardiomyopathy, cardiac valvular surgery or  
28  
29 13 open-heart surgery in the last year or known structural heart disease.  
30  
31 14 • Any condition which may interfere with the hyperthermia portion of the trial such  
32  
33 15 as: functioning cardiac pacemaker; metal plates, rods or prosthesis of the chest wall, breast  
34  
35 16 prosthesis in the treated breast, severe numbness and/or tingling of the chest wall or breast,  
36  
37 17 skin grafts and/or flaps on the breast or chest wall, scar tissue or surgical clips in the HIFU  
38  
39 18 beam path.  
40  
41 19 • Active infection.  
42  
43 20 • Body temperature > 38.0 degrees Celsius on the day of a MR-HIFU treatment.  
44  
45 21 • Concurrent use of any of the following prohibited medications within a reasonable  
46  
47 22 wash-out time: protease inhibitors, cyclosporine, carbamazepine, phenytoin, valproic acid,  
48  
49 23 paclitaxel, trastuzumab and other liposomal drugs (Abelect™, Ambisome™, Nyotran™, etc.)  
50  
51 24 or lipid-complexed drugs. Caution will be exercised with medications, dietary components and  
52  
53 25 herbal supplements that affect CYP2A4, CYP2D6 or P-gp or have been described to interact  
54  
55 26 with doxorubicin in other ways.  
56  
57  
58  
59  
60



- 1  
2  
3 1 • Contraindications to MR imaging (e.g., pacemaker in situ, severe claustrophobia,  
4  
5 2 metal implants incompatible with the MRI-scan, body size incompatible with MR bore).  
6  
7 3 • Contraindications to gadolinium-based contrast agents and the tumour is not  
8  
9 4 sufficiently visible on MRI without contrast (including prior allergic reaction to gadolinium-  
10  
11 5 based contrast agent, and/or renal failure).  
12  
13  
14 6 • Contraindications to sedation and analgesia with Propofol and Remifentanyl,  
15  
16 7 including history of Chronic Obstructive Pulmonary Disease (COPD) that results in the inability  
17  
18 8 to perform a physical activity corresponding with a Metabolic Equivalent (MET(57)) of 4;  
19  
20 9 dependence on artificial ventilation at home; sleep apnoea or an American Society of  
21  
22 10 Anaesthesiologists (ASA) classification  $\geq 4$ .  
23  
24  
25 11 • Inability to lie in prone position.  
26  
27 12 • A medical or psychiatric condition or other circumstances which would significantly  
28  
29 13 decrease the chances of understanding the informed consent process, obtaining reliable data,  
30  
31 14 achieving study objectives, or completing the study treatment and/or examinations.  
32  
33

### 34 Endpoints

35  
36  
37 16 Primary endpoints are safety, tolerability and feasibility. These will be evaluated by  
38  
39 17 the following assessments.

#### 40 41 42 18 Safety and tolerability:

- 43  
44  
45 19 • Incidence and severity of Adverse Events and Severe Adverse Events  
46  
47 20 • Incidence of Dose Limiting Toxicity (DLT, systemic and loco-regional)  
48  
49  
50 21 • Necessity for dose adjustments, delay and early cessation  
51  
52  
53 22 • Incidence and severity of post-procedural pain  
54  
55 23 • Patient reported tolerability (questionnaires)  
56  
57  
58  
59  
60

- 1
- 2
- 3 1 • Cardiotoxicity: Left Ventricular Ejection Fraction measurement and
- 4
- 5
- 6 2 electrocardiogram abnormalities.
- 7

8

9 3 Feasibility:

- 10
- 11 4 • The number of cycles in which hyperthermia treatment was sufficient: at least
- 12
- 13 30 minutes at the target temperature of 40-42 °C.
- 14
- 15
- 16 6 • The number of completed cycles with MR-HIFU induced hyperthermia, LTLD
- 17
- 18 and cyclophosphamide
- 19
- 20
- 21 8 • Quality of MR thermometry data acquired during the MR-HIFU treatment
- 22
- 23
- 24 9 • Spatiotemporal temperature distribution in the tumour
- 25
- 26
- 27 10 • Total duration of the study procedures on a treatment day.
- 28

29

30 11 Secondary endpoints consist of efficacy parameters:

- 31
- 32 12 • Assessment of distant radiological objective response rates
- 33
- 34
- 35 13 • Assessment of local radiological objective response rates
- 36

37

38 14 Study procedures

39

40 15 The study design (Figure 2) was based on the AC regimen, a well-known

41

42

43 16 chemotherapeutic regimen that consists of doxorubicin and cyclophosphamide. This

44

45

46 17 regimen is used in the (neo-)adjuvant setting as well as in the first-line chemotherapy

47

48

49 18 treatment of metastatic breast cancer. Standard of care for our study population

50

51

52 19 consists of 6 cycles at 21-days intervals. In this study we will replace doxorubicin in

53

54 20 this regimen with the combination of LTLD and MR-HIFU induced hyperthermia.

55

56 21 All participants will receive procedural sedation and analgesia with propofol and

57

58

59 22 remifentanyl to limit patient movement during the treatment and to establish a

60

1  
2  
3 1 regular breathing pattern that will facilitate respiratory gated MR thermometry [38].  
4  
5  
6 2 To prevent any hypersensitivity reactions to LTLT, the participants will also receive a  
7  
8 3 premedication regimen of steroids, H1- and H2- histamine antagonists. Anti-emetics  
9  
10  
11 4 will be administered according to standard-of-care hospital guidelines for the AC  
12  
13  
14 5 regimen.  
15  
16 6 MR-HIFU hyperthermia will be performed on the MR-HIFU breast system, with the  
17  
18  
19 7 patient in prone position. We will aim for 60 minutes of hyperthermia at 40-42 °C to  
20  
21  
22 8 the breast tumour, in four blocks of 15 minutes. After each block the MR  
23  
24  
25 9 thermometry is restarted to minimize the possible influence of magnetic field drift or  
26  
27  
28 10 patient displacement. When MR thermometry indicates that the target temperature is  
29  
30  
31 11 reached, 50 mg/m<sup>2</sup> of LTLT will be administered intravenously over 30 minutes, via a  
32  
33  
34 12 peripherally inserted central catheter (PICC), while the patient is on the MR-HIFU  
35  
36  
37 13 breast system. Temperature will be monitored by respiratory navigator-gated MR  
38  
39  
40 14 thermometry, using the proton resonance frequency shift method [39, 40]. In case the  
41  
42  
43 15 target temperature is not reached, conventional doxorubicin (60 mg/m<sup>2</sup>) will be  
44  
45  
46 16 administered instead of LTLT. Shortly after MR-HIFU, 600 mg/m<sup>2</sup> of  
47  
48  
49 17 cyclophosphamide will be administered intravenously according to standard of care  
50  
51  
52 18 in the AC regimen.  
53  
54  
55 19 Participants will receive up to six treatment cycles. Feasibility will be evaluated after  
56  
57  
58 20 each MR-HIFU treatment and during the course of the cycles. Safety and tolerability  
59  
60 21 will be assessed three hours after MR-HIFU treatment, during telephone contact on  
22 22 day +1 and +7 and during a hospital visit on day +14 and +21 of each cycle, by

1 monitoring of adverse events, laboratory measurements and evaluation of pain.  
2  
3  
4 1 monitoring of adverse events, laboratory measurements and evaluation of pain.  
5  
6 2 Cardiotoxicity evaluations (LVEF and ECG) will be performed at baseline, after cycle 3  
7  
8 3 and after cycle 6. The participants will be asked to fill out the Dutch version of the  
9  
10 4 Functional Assessment of Cancer Therapy – Breast (FACT-B, version 4, FACIT)[41] at  
11  
12 5 baseline and after each treatment cycle, combined with a selection of questions  
13  
14 6 adapted from the Dutch version of the Cancer Therapy Satisfaction Questionnaire  
15  
16 7 (CTSQ, Pfizer 2007, modified with permission from Pfizer)[42, 43] in cycles 3 and 6.  
17  
18 8 Before starting the next cycle, any toxicities will be evaluated and if necessary, dose  
19  
20 9 reductions will be made. DLT will be categorized in systemic or loco-regional toxicity  
21  
22 10 (Table 1). Thus, we aim to distinguish systemic chemotherapy effects from local  
23  
24 11 effects of MR-HIFU hyperthermia and/or the high local doxorubicin concentration.  
25  
26 12 Planned dose adjustments for these categories have been established  
27  
28 13 (Supplementary materials 2). In case of a systemic DLT the LTLD dosage will be  
29  
30 14 decreased, while for loco-regional DLT the duration of hyperthermia will be  
31  
32 15 decreased. Cyclophosphamide dose will not be reduced. No dose increases will be  
33  
34 16 performed. Depending on the severity and nature of the toxicity, study treatment can  
35  
36 17 be delayed or even ceased. In case of solely loco-regional DLT, technical issues or  
37  
38 18 other feasibility issues that restrict the use of MR-HIFU treatment, the participant will  
39  
40 19 receive the standard of care AC regimen. If hyperthermia is insufficient (i.e. the target  
41  
42 20 temperature of 40-42 °C is not reached or was only maintained for less than 30  
43  
44 21 minutes) in two separate cycles, the treatment is not considered feasible for that  
45  
46 22 patient and study participation will end.  
47  
48  
49  
50  
51  
52  
53  
54  
55  
56  
57  
58  
59  
60

1  
2  
3 1 For the secondary endpoint of efficacy, MRI of the breast will be performed using a 3  
4  
5  
6 2 Tesla MRI scanner with a dedicated breast coil, at baseline and after cycle 2 and 6 to  
7  
8  
9 3 determine local radiological objective response. In addition, MRI of the breast will be  
10  
11  
12 4 performed during each MR-HIFU treatment. However, the receiver coil in the MR-  
13  
14 5 HIFU breast system is not suited for clinical imaging. In case a complete radiological  
15  
16 6 response of the breast tumour is obtained after less than 6 cycles, the patient will  
17  
18  
19 7 continue with the conventional AC regimen.  $^{18}\text{F}$ -fluorodeoxyglucose (FDG-) Positron  
20  
21  
22 8 Emission Tomography combined with Computed Tomography (PET/CT) of the thorax  
23  
24  
25 9 and abdomen will be performed at baseline and CT or PET/CT after cycle 2 and cycle  
26  
27  
28 10 6, to determine the distant objective response according to RECIST 1.1 [44] or  
29  
30  
31 11 PERCIST 1.0 [45]. PET/CT will be performed for response evaluation in patients with  
32  
33  
34 12 only PERCIST-measurable disease, such as patients with only bone metastases. If a  
35  
36  
37 13 patient shows distant progression of disease, study participation will end and the  
38  
39  
40 14 patient will be treated according to the standard of care. Additional specific reasons  
41  
42  
43 15 for study withdrawal are dose limiting toxicity that warrants a delay in treatment  
44  
45  
46 16 administration for longer than 14 days or a recurrence of dose limiting toxicity after  
47  
48  
49 17 dose reduction of LTL (Supplementary materials 2).  
50  
51  
52 18 The participants will be followed for adverse events from the time of signing  
53  
54  
55 19 informed consent until the end of study visit after six cycles of chemotherapy.  
56  
57  
58 20 Afterwards patients will receive standard of care treatment.  
59  
60  
61 21 If the patient consents to the biobank study, additional blood samples will be taken  
62  
63  
64 22 from the PICC-line at seven time points (Figure 2) when the patient is already at the

1 hospital. These blood samples will be collected in the UMC Utrecht Biobank for future  
2 research. Moreover, in case tissue samples of the breast tumour and/or metastases  
3 were obtained in standard care before inclusion or following study participation, we  
4 will ask for consent to perform additional analyses on these samples.

#### 5 Concomitant care and prohibited interventions

6 All supportive measures consistent with optimal medical care will be employed,  
7 including transfusion of blood and blood products, and treatment with antibiotics,  
8 antiemetics, antidiarrheals, and analgesics, as appropriate.

9 Certain concomitant medications, a number of herbal supplements, food stuffs and  
10 nutritions are restricted during the study (Supplementary materials 3). Patients cannot  
11 use creams, ointments or lotions on the breast on the MR-HIFU treatment day, to  
12 avoid additional risks during the procedure. Patients cannot use methods or  
13 treatments that increase the body temperature or skin temperature during the study  
14 period (e.g. sauna, hot-water baths, warmth massages), because this could result in  
15 increased release of doxorubicin in the warmed areas, possibly causing extra adverse  
16 events.

#### 17 Interim analysis

18 An interim analysis of safety and efficacy will determine whether accrual will continue  
19 after six participants (Supplementary materials 4). Safety will be evaluated once the  
20 first six patients complete two treatment cycles. If safety is sufficiently proven or is  
21 deemed inadequate, the trial will end after six participants. Otherwise accrual will  
22 continue until twelve patients have been treated, if necessary after dose adjustments.

1  
2  
3 1 All patients who have signed informed consent will be evaluated for the primary  
4  
5  
6 2 endpoints of safety, feasibility and tolerability. Patients who have been withdrawn  
7  
8  
9 3 from the study because MR-HIFU induced hyperthermia was insufficient in two  
10  
11  
12 4 separate treatment cycles and who did not experience a DLT, will be replaced by  
13  
14  
15 5 another participant for in the interim safety evaluation. If this happens to four  
16  
17  
18 6 patients, the study will be terminated, because of insufficient feasibility.  
19  
20  
21 7 Systemic efficacy will be evaluated once the first six patients have received the CT  
22  
23  
24 8 scan after cycle 2. If four or more of the first six participants show distant disease  
25  
26  
27 9 progression at that time the trial will be stopped, as this suggests that efficacy against  
28  
29  
30 10 disease outside the heated treatment field is inadequate. This early stopping rule was  
31  
32  
33 11 based on a phase III trial with liposomal doxorubicin in metastatic breast cancer [46]  
34  
35  
36 12 where 77.5% of the subjects were free of disease progression at two months post-  
37  
38  
39 13 randomization (the 95% confidence interval of 2/6 patients does not contain 0.775).  
40  
41  
42 14 An independent, qualified monitor will monitor the study procedures. An external  
43  
44  
45 15 Data Safety Monitoring Board (DSMB) will review accumulating safety data at regular  
46  
47  
48 16 intervals throughout the study, perform the interim safety and efficacy analyses and  
49  
50  
51 17 monitor trial data integrity (DSMB charter in Supplementary materials 5).

#### 52 18 Data analysis

53  
54 19 Descriptive statistics will be used to describe the incidence and severity of adverse  
55  
56  
57 20 events (National Cancer Institute Common Terminology Criteria for Adverse Events  
58  
59  
60 21 version 5.0), the patient reported outcomes in the questionnaires and feasibility  
22  
parameters including the number of completed study treatment cycles, duration of

1 study procedures and spatiotemporal temperature distribution during MR-HIFU  
2 treatment. For the secondary endpoint of efficacy, distant and local radiological  
3 objective response rates (RECIST 1.1) will be described.

## 4 **Discussion**

5 This is the first clinical trial that investigates the combination of LTLD and MR-HIFU  
6 induced hyperthermia in breast cancer. In a small number of patients we will focus  
7 primarily on safety, tolerability and feasibility of this procedure. We hypothesize that  
8 the combination of LTLD and MR-HIFU hyperthermia leads to improved treatment of  
9 the primary tumour, without changing the systemic doxorubicin concentration and  
10 thus without interfering with systemic efficacy and toxicity. A future randomized  
11 study with a control group receiving the standard of care AC regimen would be  
12 needed to prove this. Including patients with *de novo* stage IV breast cancer provides  
13 the unique possibility to monitor both local and systemic disease simultaneously.  
14 While in this setting a survival benefit of treating the primary tumour has not been  
15 proven, the study treatment (if proven safe and feasible) could in the future improve  
16 outcomes in the neoadjuvant setting.

17 We aim to replace doxorubicin by LTLD plus MR-HIFU hyperthermia in all six cycles of  
18 the AC regimen, because we expect this to maximize the local treatment effect. In  
19 each cycle, the feasibility to achieve tumour hyperthermia at 40-42 °C for 30 minutes  
20 will be verified with MR thermometry. If hyperthermia treatment is repeatedly  
21 insufficient, or if (after any number of cycles) radiological complete response is  
22



1 already obtained, patients will continue on the standard-of-care AC regimen. The  
2 number of MR-HIFU hyperthermia plus LTLD cycles that our patients are willing and  
3 able to complete could be less than six, which would be an important feasibility  
4 finding.

5 Our goal is to maintain an equivalent systemic efficacy compared to the standard-of-  
6 care AC regimen using 60 mg/m<sup>2</sup> conventional doxorubicin. Pharmacokinetic studies  
7 showed that the area-under the curve (AUC<sub>0-∞</sub>) of free/unencapsulated doxorubicin  
8 in plasma of patients receiving LTLD 50 mg/m<sup>2</sup> with local hyperthermia or RFA [33,  
9 47, 48] was higher than the AUC<sub>0-∞</sub> of conventional doxorubicin 60 mg/m<sup>2</sup> [49-51].

10 To be able to compare the AUCs we converted the AUC<sub>0-∞</sub> of the metabolite  
11 doxorubicinol that was measured in the LTLD studies to the AUC<sub>0-∞</sub> of doxorubicin  
12 [52-54] (Additional explanation in Supplementary materials 1). The 50 mg/m<sup>2</sup> LTLD  
13 dose was also recommended for and well-tolerated in the phase III trial in  
14 combination with RFA [35]. Due to local toxicity, the recommended dose for LTLD  
15 combined with local superficial hyperthermia for chest wall recurrences was  
16 decreased to 40 mg/m<sup>2</sup> [47]. In our study local (skin) toxicity is not expected because  
17 a margin of at least 1.0 cm is preserved from the tumour to the skin, therefore the  
18 LTLD dose of 50 mg/m<sup>2</sup> was chosen. Real time MR thermometry and the lateral  
19 configuration of the MR-HIFU breast system will help mitigate this risk. If however  
20 local DLT do occur, the duration of hyperthermia will be decreased while maintaining  
21 the LTLD dosage to avoid decreasing systemic efficacy. We will only decrease LTLD  
22 dosage in case of systemic DLT. If despite these measures, systemic efficacy seems

1  
2  
3 1 inadequate, the trial will be halted prematurely based on the interim analysis for  
4  
5  
6 2 efficacy.  
7  
8 3 Because this is a small phase I feasibility study, the results will only provide a rough  
9  
10  
11 4 indication of local efficacy based on radiological response. To diminish the burden on  
12  
13  
14 5 participants, we will not perform tissue biopsies or breast surgery and therefore  
15  
16  
17 6 cannot describe the number of pathological complete responses or measure the  
18  
19  
20 7 concentration of doxorubicin in the tumour. Proof-of-concept that hyperthermia  
21  
22  
23 8 increases the tumour doxorubicin concentration has already been established in the  
24  
25  
26 9 Tardox study, although doxorubicin concentrations were not compared between  
27  
28  
29 10 heated and unheated tumours.  
30  
31  
32 11 With this phase I clinical trial, we aim to show that LTLD combined with MR-HIFU  
33  
34  
35 12 induced hyperthermia on a dedicated MR-HIFU breast system can safely replace  
36  
37  
38 13 doxorubicin in the AC regimen. We hypothesize that this combination will result in  
39  
40  
41 14 improved response of the primary tumour without compromising the systemic  
42  
43  
44 15 efficacy on metastatic sites or increasing systemic toxicity. If feasibility and tolerability  
45  
46  
47 16 are adequate, this approach could in the future lead to optimal loco-regional control  
48  
49  
50 17 with less extensive or even no surgery, in stage II or III breast cancer patients  
51  
52  
53 18 allocated to receive neo-adjuvant chemotherapy. Finally, it could also be suitable for  
54  
55  
56 19 other doxorubicin sensitive tumour types that benefit from enhanced local treatment,  
57  
58  
59 20 such as soft tissue sarcoma.  
60

21  
22 **Word Count**

1  
2  
3 1 4351 words  
4  
5

6 2  
7

8 3 **Ethics and dissemination**  
9

10 4 This study has obtained ethical approval by the Medical Research Ethics Committee  
11  
12  
13 5 of the UMC Utrecht (METC Utrecht) on May 29<sup>th</sup> 2019 (Protocol NL67422.041.18,  
14  
15  
16 6 METC number 18-702). This paper is based on protocol version 6, dated August 28<sup>th</sup>  
17  
18  
19 7 2020. Substantial protocol amendments will also be evaluated by METC Utrecht and  
20  
21  
22 8 communicated to relevant parties by the investigators. Informed consent will be  
23  
24  
25 9 obtained from all patients by an authorized representative of the Principal  
26  
27 10 Investigator before study participation (Informed consent form in Supplementary  
28  
29  
30 11 materials 6). The results of this study will be disseminated by publication in an  
31  
32  
33 12 academic peer-reviewed journal.  
34

35 13 **Roles and responsibilities**  
36

37 14 This is an investigator-driven single-centre clinical trial, with the UMC Utrecht as  
38  
39  
40 15 sponsor and trial site. The UMC Utrecht is responsible for the study design, data  
41  
42  
43 16 collection, data management, analysis, interpretation of data, writing and submission  
44  
45  
46 17 of the report for publication. The Principal Investigator will rapport (serious) adverse  
47  
48  
49 18 (device) events to the METC Utrecht, to the Central Committee on Research Involving  
50  
51  
52 19 Human Subjects (CCMO), and to Celsion Corporation and Profound Medical  
53  
54  
55 20 according to national guidelines. UMC Utrecht has liability insurance which provides  
56  
57  
58 21 cover for damage to research subjects through injury or death caused by the study.  
59  
60 22 Celsion Corporation (manufacturer of the investigational medicinal product) and

1 Profound Medical (manufacturer of the investigational medical device) will provide  
2 technical support during the trial and have provided input on the study protocol.  
3 Both manufacturers will be allowed to review and comment on draft publications  
4 prior to submission. The investigators at the UMC Utrecht will have ultimate authority  
5 over the publication. An external Data Safety Monitoring Board (two clinicians and  
6 one statistician) has been established and an independent qualified monitor (Julius  
7 Clinical) has been appointed to perform intensive monitoring.

### 8 **Data management**

9 The handling of personal data will comply with the General Data Protection  
10 Regulation (GDPR, in Dutch known as AVG). After informed consent is signed, each  
11 patient receives a unique subject number. A subject identification code list will be  
12 used to link the data to the subject. The key to this pseudonymization code will be  
13 available only to the investigators and employees of the research team.  
14 Research data that are relevant for the study will be collected by the investigators on  
15 electronic Case Report Forms (eCRFs) in Research Online, in compliance with the  
16 Good Clinical Practice (GCP) guidelines for electronic data collection. An audit trail  
17 will be available. The completed eCRFs will be reviewed, signed and dated by the  
18 Principal Investigator or Co-investigator. Scans, results and registrations of medical  
19 imaging will be collected on the Research Imaging Architecture (RIA), which is  
20 secured by password-protection and stores pseudonymized images. Data from the  
21 MR-HIFU device such as log files and MR images obtained during the MR-HIFU  
22 treatment that cannot be stored on the Research Imaging Architecture will be stored



1  
2  
3 1 JdM, BS, MB, SL, CM, EW and RD were all involved in the design of the study and in  
4  
5  
6 2 writing the manuscript.

7  
8 3 PvD, HV and AW critically reviewed the design of the study providing additional  
9  
10  
11 4 comments and suggestions.

### 12 13 14 5 **Funding statement**

15  
16 6 This work was supported by the Dutch Cancer Foundation (project no. UU 2015-  
17  
18  
19 7 7891), Center for Translational Molecular Medicine (CTMM) in the projects  
20  
21  
22 8 VOLTAVALO (project no. 09P-106) and HIFU-chem (project no. 03O-301) and by  
23  
24  
25 9 "Friends of the UMC Utrecht".

### 26 27 10 **Acknowledgements**

28  
29  
30 11 We thank Roelien Kronemeijer of the trial bureau medical oncology and Heleen Klein  
31  
32  
33 12 Wolterink-Blok, research nurse medical oncology, for their work leading up to the  
34  
35  
36 13 Medical Research Ethics Committee approval of the study and the start of patient  
37  
38 14 recruitment.

39  
40 15 We thank Prof. Gert Storm for his work in the preceding HIFU-CHEM project that has  
41  
42  
43 16 contributed to the current project.

44  
45  
46 17 We thank Christiaan van Kesteren for his help with the design of Figure 1.

47  
48 18 We thank Celsion Corporation for their support relating the use and safety of  
49  
50  
51 19 ThermoDox and their input during the design of the study.

52  
53  
54 20 Finally, we thank Profound Medical for their support relating the use and safety of the  
55  
56  
57 21 MR-HIFU breast system in their role as legal manufacturer of this investigational  
58  
59 22 medical device.  
60

1  
2  
3 **1 Competing interests statement**  
4

5  
6 2 The authors have no competing interest to declare.  
7

8 **3 List of abbreviations**  
9

|    |    |                    |                                                             |
|----|----|--------------------|-------------------------------------------------------------|
| 10 | 4  | AC                 | Doxorubicin (A) and cyclophosphamide (C)                    |
| 11 |    |                    |                                                             |
| 12 |    |                    |                                                             |
| 13 | 5  | AF                 | Alkaline Phosphatase                                        |
| 14 |    |                    |                                                             |
| 15 |    |                    |                                                             |
| 16 | 6  | ALAT               | Alanine Transaminase                                        |
| 17 |    |                    |                                                             |
| 18 |    |                    |                                                             |
| 19 | 7  | ANC                | Absolute Neutrophil Count                                   |
| 20 |    |                    |                                                             |
| 21 |    |                    |                                                             |
| 22 | 8  | ASAT               | Aspartate Transaminase                                      |
| 23 |    |                    |                                                             |
| 24 | 9  | AUC <sub>0-∞</sub> | Area Under the Curve 0-infinity                             |
| 25 |    |                    |                                                             |
| 26 |    |                    |                                                             |
| 27 | 10 | CCMO               | Central Committee on Research Involving Human Subjects      |
| 28 |    |                    |                                                             |
| 29 |    |                    |                                                             |
| 30 | 11 | CTSQ               | Cancer Therapy Satisfaction Questionnaire                   |
| 31 |    |                    |                                                             |
| 32 |    |                    |                                                             |
| 33 | 12 | DCE                | Dynamic contrast-enhanced                                   |
| 34 |    |                    |                                                             |
| 35 | 13 | DLT                | Dose Limiting Toxicity                                      |
| 36 |    |                    |                                                             |
| 37 |    |                    |                                                             |
| 38 | 14 | DSMB               | Data Safety Monitoring Board                                |
| 39 |    |                    |                                                             |
| 40 |    |                    |                                                             |
| 41 | 15 | eCRF               | electronic Case Report Forms                                |
| 42 |    |                    |                                                             |
| 43 | 16 | FACT-B             | Functional Assessment of Cancer Therapy – Breast            |
| 44 |    |                    |                                                             |
| 45 |    |                    |                                                             |
| 46 | 17 | GCP                | Good Clinical Practice                                      |
| 47 |    |                    |                                                             |
| 48 |    |                    |                                                             |
| 49 | 18 | GDPR               | General Data Protection Regulation                          |
| 50 |    |                    |                                                             |
| 51 |    |                    |                                                             |
| 52 | 19 | LTLD               | Lyso-Thermosensitive Liposomal Doxorubicin                  |
| 53 |    |                    |                                                             |
| 54 | 20 | MR-HIFU            | Magnetic Resonance guided High Intensity Focused Ultrasound |
| 55 |    |                    |                                                             |
| 56 | 21 | MRI                | Magnetic Resonance Imaging                                  |
| 57 |    |                    |                                                             |
| 58 |    |                    |                                                             |
| 59 |    |                    |                                                             |
| 60 |    |                    |                                                             |

- 1  
2  
3 1 (FDG-) PET/CT  $^{18}\text{F}$ -Fluorodeoxyglucose Positron Emission Tomography  
4  
5  
6 2 combined with Computed Tomography  
7  
8 3 PICC Peripherally inserted central catheter  
9  
10  
11 4 RFA Radiofrequency ablation  
12  
13  
14 5 RIA Research Imaging Architecture  
15  
16  
17 6  
18  
19  
20  
21  
22  
23  
24  
25  
26  
27  
28  
29  
30  
31  
32  
33  
34  
35  
36  
37  
38  
39  
40  
41  
42  
43  
44  
45  
46  
47  
48  
49  
50  
51  
52  
53  
54  
55  
56  
57  
58  
59  
60

For peer review only



## 1 References

1. van Ramshorst MS, van der Voort A, van Werkhoven ED, et al. Neoadjuvant chemotherapy with or without anthracyclines in the presence of dual HER2 blockade for HER2-positive breast cancer (TRAIN-2): a multicentre, open-label, randomised, phase 3 trial. *The Lancet Oncology* 2018;19(12):1630-40.
2. Ponce AM, Viglianti BL, Yu D, et al. Magnetic resonance imaging of temperature-sensitive liposome release: drug dose painting and antitumor effects. *J Natl Cancer Inst* 2007;99(1):53-63.
3. Koechli OR, Sevin B, Perras JP, et al. Comparative chemosensitivity profiles in three human breast cancer cell lines with the ATP-cell viability assay. *Oncology* 1995;51:552-8.
4. Besse HC, Barten-van Rijbroek AD, van der Wurff-Jacobs KMG, et al. Tumor drug distribution after local drug delivery by hyperthermia, in vivo. *Cancers (Basel)* 2019;11(10).
5. Moehler M, Dimitrakopoulou-Strauss A, Gutzler F, et al. 18F-Labeled fluorouracil Positron Emission Tomography and the prognoses of colorectal carcinoma patients with metastases to the liver treated with 5-fluorouracil. *Cancer* 1998;83(2):245-53.
6. van der Veldt AA, Lubberink M, Mathijssen RH, et al. Toward prediction of efficacy of chemotherapy: a proof of concept study in lung cancer patients using [(1)(1)C]docetaxel and positron emission tomography. *Clin Cancer Res* 2013;19(15):4163-73.
7. Budman DR, Berry DA, Cirrincione CT, et al. Dose and dose intensity as determinants of outcome in the adjuvant treatment of breast cancer. *Journal of the National Cancer Institute*, 1998;90(16):1205-11.
8. Henderson IC, Berry DA, Demetri GD, et al. Improved outcomes from adding sequential Paclitaxel but not from escalating Doxorubicin dose in an adjuvant chemotherapy regimen for patients with node-positive primary breast cancer. *J Clin Oncol* 2003;21(6):976-83.
9. Khan SA. Surgical Management of de novo Stage IV Breast Cancer. *Semin Radiat Oncol* 2016;26(1):79-86.
10. Headon H, Wazir U, Kasem A, et al. Surgical treatment of the primary tumour improves the overall survival in patients with metastatic breast cancer: A systematic review and meta-analysis. *Mol Clin Oncol* 2016;4(5):863-7.
11. Soran A, Ozmen V, Ozbas S, et al. The importance of primary surgery in patients with de novo stage IV breast cancer; finalizing the protocol MF07-01 randomized clinical trial. *Poster P1-20-01 at San Antonio Breast Cancer Symposium 2019* 2019.
12. Badwe R, Hawaldar R, Nair N, et al. Locoregional treatment versus no treatment of the primary tumour in metastatic breast cancer: an open-label randomised controlled trial. *Lancet Oncol* 2015;16(13):1380-8.
13. Tsukioki T, Shien T, Doihara H. Effect of local surgery on outcomes of stage IV breast cancer. *Translational Cancer Research* 2020;9(8):5102-7.
14. Khan SA, Zhao F, Solin LJ, et al. A randomized phase III trial of systemic therapy plus early local therapy versus systemic therapy alone in women with de novo stage IV breast cancer: A trial of the ECOG-ACRIN Research Group (E2108). *Journal of Clinical Oncology* 2020;38(18\_suppl; abstr LBA2).
15. Al-Jamal WT, Al-Ahmady ZS, Kostarelos K. Pharmacokinetics & tissue distribution of temperature-sensitive liposomal doxorubicin in tumor-bearing mice triggered with mild hyperthermia. *Biomaterials* 2012;33(18):4608-17.

- 1 16. Needham D, Anyarambhatla G, Kong G, et al. A new temperature-sensitive  
2 liposome for use with mild hyperthermia: characterization and testing in a human  
3 tumor xenograft model. *Cancer Res* 2000;60:1197-201.
- 4 17. Needham D, Dewhirst MW. The development and testing of a new temperature-  
5 sensitive drug delivery system for the treatment of solid tumors. *Adv Drug Deliv Rev*  
6 2001;53:285-305.
- 7 18. Kong G, Anyarambhatla G, Petros WP, et al. Efficacy of Liposomes and  
8 Hyperthermia in a Human Tumor Xenograft Model: Importance of Triggered Drug  
9 Release. *Cancer Res* 2000;60:6950-7.
- 10 19. Ranjan A, Jacobs GC, Woods DL, et al. Image-guided drug delivery with magnetic  
11 resonance guided high intensity focused ultrasound and temperature sensitive  
12 liposomes in a rabbit Vx2 tumor model. *J Control Release* 2012;158(3):487-94.
- 13 20. Staruch RM, Ganguly M, Tannock IF, et al. Enhanced drug delivery in rabbit VX2  
14 tumours using thermosensitive liposomes and MRI-controlled focused ultrasound  
15 hyperthermia. *Int J Hyperthermia* 2012;28(8):776-87.
- 16 21. de Smet M, Hijnen NM, Langereis S, et al. Magnetic Resonance Guided High-  
17 Intensity Focused Ultrasound Mediated Hyperthermia Improves the Intratumoral  
18 Distribution of Temperature-Sensitive Liposomal Doxorubicin. *Invest Radiol*  
19 2013;48:395-405.
- 20 22. Li L, ten Hagen TL, Hossann M, et al. Mild hyperthermia triggered doxorubicin  
21 release from optimized stealth thermosensitive liposomes improves intratumoral drug  
22 delivery and efficacy. *J Control Release* 2013;168(2):142-50.
- 23 23. Kim YS, Keserci B, Partanen A, et al. Volumetric MR-HIFU ablation of uterine  
24 fibroids: role of treatment cell size in the improvement of energy efficiency. *Eur J Radiol*  
25 2012;81(11):3652-9.
- 26 24. Hurwitz MD, Ghanouni P, Kanaev SV, et al. Magnetic resonance-guided focused  
27 ultrasound for patients with painful bone metastases: phase III trial results. *J Natl Cancer*  
28 *Inst* 2014;106(5).
- 29 25. Hsiao YH, Kuo SJ, Tsai HD, et al. Clinical Application of High-intensity Focused  
30 Ultrasound in Cancer Therapy. *J Cancer* 2016;7(3):225-31.
- 31 26. Chu W, Staruch RM, Pichardo S, et al. Magnetic Resonance-Guided High-Intensity  
32 Focused Ultrasound Hyperthermia for Recurrent Rectal Cancer: MR Thermometry  
33 Evaluation and Preclinical Validation. *Int J Radiat Oncol Biol Phys* 2016;95(4):1259-67.
- 34 27. Bing C, Patel P, Staruch RM, et al. Longer heating duration increases localized  
35 doxorubicin deposition and therapeutic index in Vx2 tumors using MR-HIFU mild  
36 hyperthermia and thermosensitive liposomal doxorubicin. *Int J Hyperthermia*  
37 2019;36(1):196-203.
- 38 28. Zhu L, Partanen A, Talcott MR, et al. Feasibility and safety assessment of magnetic  
39 resonance-guided high-intensity focused ultrasound (MRgHIFU)-mediated mild  
40 hyperthermia in pelvic targets evaluated using an in vivo porcine model. *Int J*  
41 *Hyperthermia* 2019;36(1):1147-59.
- 42 29. Deckers R, Rome C, Moonen CT. The role of ultrasound and magnetic resonance in  
43 local drug delivery. *J Magn Reson Imaging* 2008;27(2):400-9.
- 44 30. Merckel LG, Bartels LW, Kohler MO, et al. MR-guided high-intensity focused  
45 ultrasound ablation of breast cancer with a dedicated breast platform. *Cardiovasc*  
46 *Intervent Radiol* 2013;36(2):292-301.
- 47 31. Deckers R, Merckel LG, Denis de Senneville B, et al. Performance analysis of a  
48 dedicated breast MR-HIFU system for tumor ablation in breast cancer patients. *Phys Med*  
49 *Biol* 2015;60(14):5527-42.

- 1  
2  
3 1 32. Merckel LG, Knuttel FM, Deckers R, et al. First clinical experience with a dedicated  
4 2 MRI-guided high-intensity focused ultrasound system for breast cancer ablation. *Eur*  
5 3 *Radiol* 2016;26(11):4037-46.  
6 4 33. Zagar TM, Vujaskovic Z, Formenti S, et al. Two phase I dose-  
7 5 escalation/pharmacokinetics studies of low temperature liposomal doxorubicin (LTLTD)  
8 6 and mild local hyperthermia in heavily pretreated patients with local regionally  
9 7 recurrent breast cancer. *Int J Hyperthermia* 2014;30(5):285-94.  
10 8 34. Poon RT, Borys N. Lyso-thermosensitive liposomal doxorubicin: an adjuvant to  
11 9 increase the cure rate of radiofrequency ablation in liver cancer. *Future Oncol*  
12 10 2011;7(8):937-45.  
13 11 35. Tak WY, Lin SM, Wang Y, et al. Phase III HEAT Study Adding Lyso-  
14 12 Thermosensitive Liposomal Doxorubicin to Radiofrequency Ablation in Patients with  
15 13 Unresectable Hepatocellular Carcinoma Lesions. *Clin Cancer Res* 2018;24(1):73-83.  
16 14 36. Lyon PC, Gray MD, Mannaris C, et al. Safety and feasibility of ultrasound-triggered  
17 15 targeted drug delivery of doxorubicin from thermosensitive liposomes in liver tumours  
18 16 (TARDOX): a single-centre, open-label, phase 1 trial. *Lancet Oncol* 2018;19(8):1027-39.  
19 17 37. Gray MD, Lyon PC, Mannaris C, et al. Focused Ultrasound Hyperthermia for  
20 18 Targeted Drug Release from Thermosensitive Liposomes: Results from a Phase I Trial.  
21 19 *Radiology* 2019;291(1):232-8.  
22 20 38. van Breugel JM, Wijlemans JW, Vaessen HH, et al. Procedural sedation and  
23 21 analgesia for respiratory-gated MR-HIFU in the liver: a feasibility study. *J Ther*  
24 22 *Ultrasound* 2016;4:19.  
25 23 39. Ishihara Y, Calderon A, Watanabe H, et al. A precise and fast temperature  
26 24 mapping using water proton chemical shift. *MRM* 1995;34:814-23.  
27 25 40. de Poorter J. Noninvasive MRI thermometry with the proton resonance frequency  
28 26 method: study of susceptibility effects. *MRM* 1995;34:359-67.  
29 27 41. Brady MJ, Cella DF, Mo F, et al. Reliability and Validity of the Functional  
30 28 Assessment of Cancer Therapy-Breast Quality-of-Life Instrument. *J Clin Oncol*  
31 29 1997;15:974-86.  
32 30 42. Abetz L, Coombs JH, Keininger DL, et al. Development of the cancer therapy  
33 31 satisfaction questionnaire: item generation and content validity testing. *Value Health*  
34 32 2005;8 Suppl 1:S41-53.  
35 33 43. Cheung K, de Mol M, Visser S, et al. Reliability and validity of the Cancer Therapy  
36 34 Satisfaction Questionnaire in lung cancer. *Qual Life Res* 2016;25(1):71-80.  
37 35 44. Eisenhauer EA, Therasse P, Bogaerts J, et al. New response evaluation criteria in  
38 36 solid tumours: revised RECIST guideline (version 1.1). *Eur J Cancer* 2009;45(2):228-47.  
39 37 45. Wahl RL, Jacene H, Kasamon Y, et al. From RECIST to PERCIST: Evolving  
40 38 Considerations for PET response criteria in solid tumors. *J Nucl Med* 2009;50 Suppl  
41 39 1:122S-50S.  
42 40 46. Chan S, Davidson N, Juozaityte E, et al. Phase III trial of liposomal doxorubicin and  
43 41 cyclophosphamide compared with epirubicin and cyclophosphamide as first-line  
44 42 therapy for metastatic breast cancer. *Ann Oncol* 2004;15(10):1527-34.  
45 43 47. Celsion Corporation. ThermoDox®, Lyso-Thermosensitive Liposomal  
46 44 Doxorubicin (LTLTD), Investigator's Brochure. 2019.  
47 45 48. Wood BJ, Poon RT, Locklin JK, et al. Phase I study of heat-deployed liposomal  
48 46 doxorubicin during radiofrequency ablation for hepatic malignancies. *J Vasc Interv*  
49 47 *Radiol* 2012;23(2):248-55 e7.  
50  
51  
52  
53  
54  
55  
56  
57  
58  
59  
60

- 1  
2  
3 1 49. Gabizon A, Catane R, Uziely B, et al. Prolonged circulation time and enhanced  
4 2 accumulation in malignant exudates of doxorubicin encapsulated in polyethylene-glycol  
5 3 coated liposomes. *Cancer Res* 1994;54(4):987-92.
- 6 4 50. Swenson CE, Bolcsak LE, Batist G, et al. Pharmacokinetics of doxorubicin  
7 5 administered i.v. as Myocet (TLC D-99; liposome-encapsulated doxorubicin citrate)  
8 6 compared with conventional doxorubicin when given in combination with  
9 7 cyclophosphamide in patients with metastatic breast cancer. *Anticancer Drugs*  
10 8 2003;14(3):239-46.
- 11 9 51. Joerger M, Huitema ADR, Richel DJ, et al. Population pharmacokinetics and  
12 10 pharmacodynamics of doxorubicin and cyclophosphamide in breast cancer patients. *Clin*  
13 11 *Pharmacokinet* 2007;46(12):1051-68.
- 14 12 52. Jacquet JM, Bressolle F, Galtier M, et al. Doxorubicin and doxorubicinol: intra- and  
15 13 inter-individual variations of pharmacokinetic parameters. *Cancer Chemother Pharmacol*  
16 14 1990;27(3):219-25.
- 17 15 53. Callies S, de Alwis DP, Wright JG, et al. A population pharmacokinetic model for  
18 16 doxorubicin and doxorubicinol in the presence of a novel MDR modulator, zosuquidar  
19 17 trihydrochloride (LY335979). *Cancer Chemother Pharmacol* 2003;51(2):107-18.
- 20 18 54. Joerger M, Huitema AD, Meenhorst PL, et al. Pharmacokinetics of low-dose  
21 19 doxorubicin and metabolites in patients with AIDS-related Kaposi sarcoma. *Cancer*  
22 20 *Chemother Pharmacol* 2005;55(5):488-96.
- 23  
24  
25  
26  
27  
28  
29  
30  
31  
32  
33  
34  
35  
36  
37  
38  
39  
40  
41  
42  
43  
44  
45  
46  
47  
48  
49  
50  
51  
52  
53  
54  
55  
56  
57  
58  
59  
60

## 1 **Figures and tables**

2  
3  
4  
5  
6  
7  
8  
9  
10  
11  
12  
13  
14  
15  
16  
17  
18  
19  
20  
21  
22  
23  
24  
25  
26  
27  
28  
29  
30  
31  
32  
33  
34  
35  
36  
37  
38  
39  
40  
41  
42  
43  
44  
45  
46  
47  
48  
49  
50  
51  
52  
53  
54  
55  
56  
57  
58  
59  
60

1 **Figure 1** The concept of LTLD combined with MR-HIFU hyperthermia for local drug delivery in the primary breast tumour. The patient is lying in prone position on the dedicated MR-HIFU breast system under procedural sedation and analgesia, with the breast hanging in the water-filled cup. HIFU-induced hyperthermia is administered to the tumour for 60 minutes. Real-time MR thermometry (screen on the right) allows for precise control of the target temperature of 40-42 °C in the tumour. After intravenous infusion, LTLD circulates through the vasculature and releases a small amount of doxorubicin at 37°C. However, when LTLD reaches the heated tumour it releases a high amount of doxorubicin intravascularly within seconds. We hypothesize that the combination of LTLD and MR-HIFU hyperthermia will increase the tumour concentration of doxorubicin without interfering with systemic treatment efficacy and toxicity.

15 **Figure 2** Study procedures. The standard of care palliative AC regimen consists of 6 cycles of doxorubicin and cyclophosphamide at 21-days intervals. In this study we will replace doxorubicin with the combination of LTLD and MR-HIFU induced hyperthermia, in up to six cycles. After informed consent, the baseline procedures will be performed as mentioned. During the cycles, the primary endpoints of safety (adverse events), feasibility and tolerability will be monitored, including cardiotoxicity evaluation and questionnaires on specified time points as indicated in the bottom of the figure. Imaging to determine local (MRI) and systemic ((PET)/CT) response will be

1 performed at baseline, after cycle two and after cycle six. Optionally, the patient can  
 2 consent to additional blood sampling for future research, which will be stored in the  
 3 Biobank.

4  
 5 Table 1 Definitions of Dose Limiting Toxicity

| <b>Dose limiting systemic toxicity</b>      |                                                                                                                                                                                                                                                                                                                                                                                                                                                                                              |
|---------------------------------------------|----------------------------------------------------------------------------------------------------------------------------------------------------------------------------------------------------------------------------------------------------------------------------------------------------------------------------------------------------------------------------------------------------------------------------------------------------------------------------------------------|
| A                                           | <i>Hematologic DLT</i><br>defined as Grade 3 anaemia, Grade 4 thrombocytopenia, febrile neutropenia, or Grade 4 neutropenia $\geq 7$ days in duration.                                                                                                                                                                                                                                                                                                                                       |
| B                                           | <i>Non-hematologic DLT (non-loco-regional)</i><br>defined as Grade 3 or greater toxicity with the exceptions of alopecia, fatigue, nausea or vomiting and loco-regional effects.<br>Including Cardiotoxicity DLT, defined as: <ul style="list-style-type: none"> <li>• Grade 3 or greater cardiac disorders OR</li> <li>• a decline in LVEF of <math>&gt; 15\%</math> while the LVEF remains <math>&gt; 40\%</math> OR</li> <li>• a decline to an LVEF of <math>\leq 40\%</math>.</li> </ul> |
| <b>Dose limiting loco-regional toxicity</b> |                                                                                                                                                                                                                                                                                                                                                                                                                                                                                              |
| C                                           | <i>Loco-regional DLT</i><br>defined as post-procedural effects (e.g. pain or skin effects) on the treated breast warranting dose adjustment or delay.                                                                                                                                                                                                                                                                                                                                        |

6

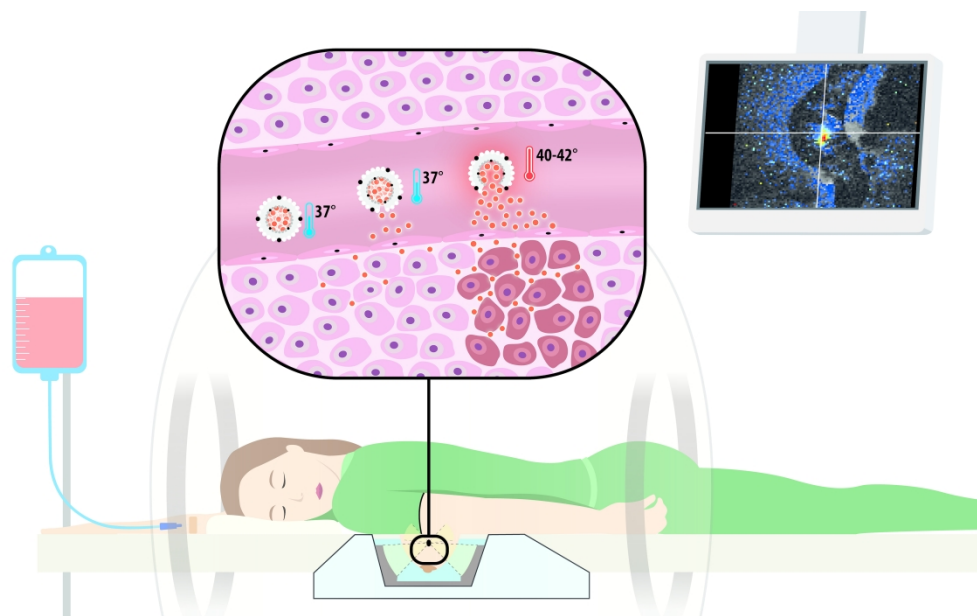

Figure 1 The concept of LTLD combined with MR-HIFU hyperthermia for local drug delivery in the primary breast tumour. The patient is lying in prone position on the dedicated MR-HIFU breast system under procedural sedation and analgesia, with the breast hanging in the water-filled cup. HIFU-induced hyperthermia is administered to the tumour for 60 minutes. Real-time MR thermometry (screen on the right) allows for precise control of the target temperature of 40-42 °C in the tumour. After intravenous infusion, LTLD circulates through the vasculature and releases a small amount of doxorubicin at 37°C. However, when LTLD reaches the heated tumour it releases a high amount of doxorubicin intravascularly within seconds. We hypothesize that the combination of LTLD and MR-HIFU hyperthermia will increase the tumour concentration of doxorubicin without interfering with systemic treatment efficacy and toxicity.

210x127mm (600 x 600 DPI)

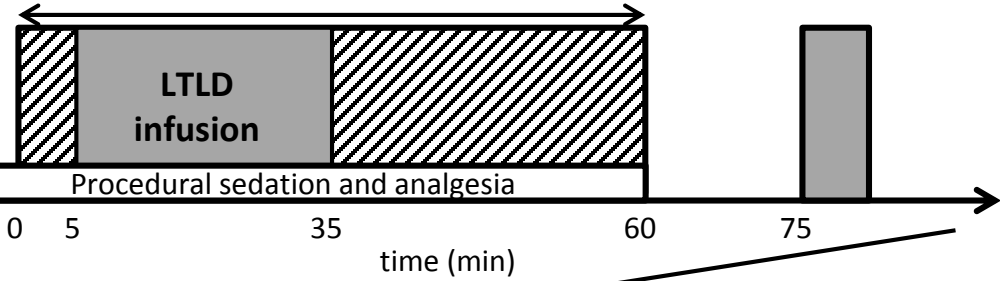

Informed Consent

- 1 Baseline evaluations
- 2 Clinical exam
- 3 Blood and urine evaluation
- 4 Cardiotoxicity evaluation
- 5 Pre-sedation screening
- 6 PICC line placement

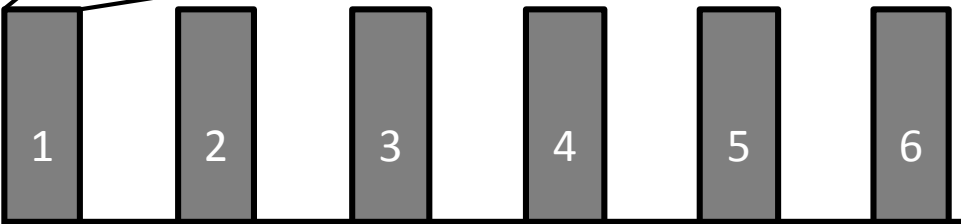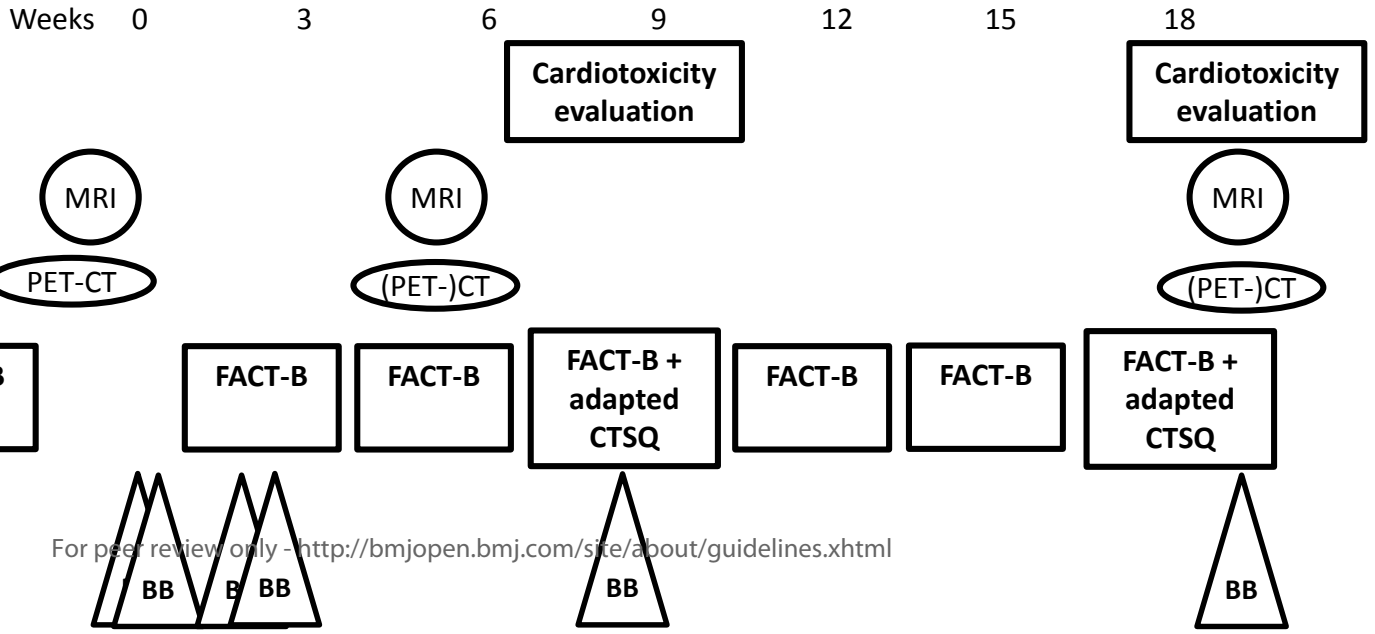

1  
2  
3  
4  
5  
6  
7  
8  
9  
10  
11  
12  
13  
14  
15  
16  
17  
18  
19  
20  
21  
22  
23  
24  
25  
26  
27  
28  
29  
30  
31  
32  
33  
34  
35  
36  
37  
38  
39  
40  
41



**Supplementary materials:**

|                                                                                                                          |            |
|--------------------------------------------------------------------------------------------------------------------------|------------|
| <b>Supplement 1 Comparison of <math>AUC_{0-\infty}</math> of free doxorubicin for LTLD and conventional doxorubicin.</b> | <b>S2</b>  |
| <b>Supplement 2 Dose adjustments in the i-GO study.</b>                                                                  | <b>S4</b>  |
| <b>Supplement 3 Restrictions to concomitant medications and products</b>                                                 | <b>S10</b> |
| <b>Supplement 4 Flow-chart interim analysis</b>                                                                          | <b>S21</b> |
| <b>Supplement 5 Data Safety Monitoring Board Charter</b>                                                                 | <b>S22</b> |
| <b>Supplement 6 Patient informed consent form in English</b>                                                             | <b>S29</b> |

### Supplement 1 Comparison of AUC<sub>0-∞</sub> of free doxorubicin for LTLD and conventional doxorubicin.

In order to obtain a systemic dose of free doxorubicin (due to leakage of LTLD at 37 °C) that is as similar to conventional doxorubicin at 60 mg/m<sup>2</sup> (which is the standard of care treatment for the patients that will be enrolled in this study) as possible (to avoid undertreatment) we will start at the dose of 50 mg/m<sup>2</sup> LTLD, and we will apply dose adjustments when necessary. To compare the systemic dose of free doxorubicin after LTLD plus hyperthermia to the systemic dose of conventional doxorubicin, we summarized the pharmacokinetic data of the three studies with LTLD in which total plasma doxorubicin and the metabolite doxorubicinol were measured with a validated assay (studies 104-03-101 [1], 104-06-101 [2], and IND #174,188 [3]). In these studies the Area Under the Curve from t=0 to infinity (AUC<sub>0-∞</sub>) of the metabolite doxorubicinol was measured. Note that in these studies LTLD was administered with hyperthermia or RFA treatment. Pharmacokinetic data on LTLD without heating are not available. The mean values were converted to the AUC<sub>0-∞</sub> of 'free doxorubicin' based on the mean ratios between doxorubicinol and doxorubicin found in three studies (0.3826, 0.47 and 0.514 respectively, with a mean of 0.456) [4-6]. We compared these AUC<sub>0-∞</sub> values of 'free doxorubicin' from the LTLD studies with the AUC<sub>0-∞</sub> values of doxorubicin in pharmacokinetic studies of conventional doxorubicin [7-9]. Figure S2 displays the AUC<sub>0-∞</sub> of three studies with conventional doxorubicin (actual doxorubicin values are portrayed) and the AUC<sub>0-∞</sub> of three studies with LTLD (calculated 'free doxorubicin' values are portrayed). The figure shows that the calculated 'free doxorubicin' after LTLD 50 mg/m<sup>2</sup> is at least equal to that of conventional doxorubicin at 60 mg/m<sup>2</sup>.

**Figure S2: Comparison of the AUC<sub>0-∞</sub> of "free" plasma doxorubicin for LTLD + heat (calculated based on doxorubicinol concentration) and conventional doxorubicin.**

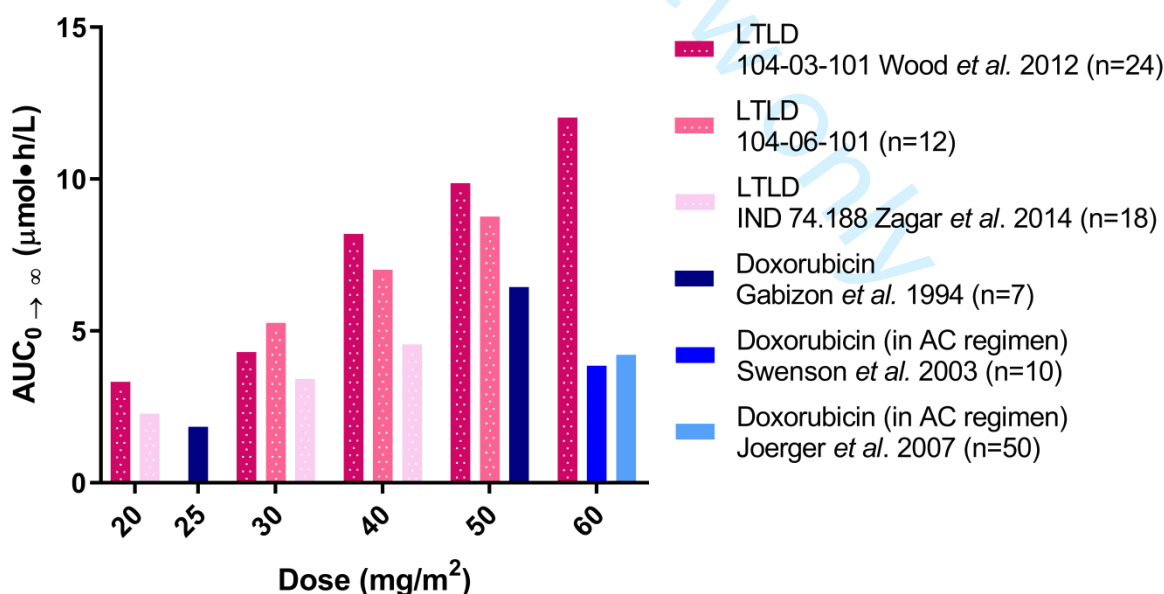

### Supplementary References

1. Wood BJ, Poon RT, Locklin JK, et al. Phase I study of heat-deployed liposomal doxorubicin during radiofrequency ablation for hepatic malignancies. *J Vasc Interv Radiol* 2012;23(2):248-55 e7.

- 1
- 2
- 3 2. Celsion Corporation. ThermoDox®, Lyso-Thermosensitive Liposomal Doxorubicin (LTLD),  
4 Investigator's Brochure. 2019.
- 5 3. Zagar TM, Vujaskovic Z, Formenti S, et al. Two phase I dose-escalation/pharmacokinetics studies of  
6 low temperature liposomal doxorubicin (LTLD) and mild local hyperthermia in heavily pretreated  
7 patients with local regionally recurrent breast cancer. *Int J Hyperthermia* 2014;30(5):285-94.
- 8 4. Jacquet JM, Bressolle F, Galtier M, et al. Doxorubicin and doxorubicinol: intra- and inter-individual  
9 variations of pharmacokinetic parameters. *Cancer Chemother Pharmacol* 1990;27(3):219-25.
- 10 5. Joerger M, Huitema AD, Meenhorst PL, et al. Pharmacokinetics of low-dose doxorubicin and  
11 metabolites in patients with AIDS-related Kaposi sarcoma. *Cancer Chemother Pharmacol*  
12 2005;55(5):488-96.
- 13 6. Callies S, de Alwis DP, Wright JG, et al. A population pharmacokinetic model for doxorubicin and  
14 doxorubicinol in the presence of a novel MDR modulator, zosuquidar trihydrochloride (LY335979).  
15 *Cancer Chemother Pharmacol* 2003;51(2):107-18.
- 16 7. Gabizon A, Catane R, Uziely B, et al. Prolonged circulation time and enhanced accumulation in  
17 malignant exudates of doxorubicin encapsulated in polyethylene-glycol coated liposomes. *Cancer Res*  
18 1994;54(4):987-92.
- 19 8. Swenson CE, Bolcsak LE, Batist G, et al. Pharmacokinetics of doxorubicin administered i.v. as  
20 Myocet (TLC D-99; liposome-encapsulated doxorubicin citrate) compared with conventional  
21 doxorubicin when given in combination with cyclophosphamide in patients with metastatic breast  
22 cancer. *Anticancer Drugs* 2003;14(3):239-46.
- 23 9. Joerger M, Huitema ADR, Richel DJ, et al. Population pharmacokinetics and pharmacodynamics of  
24 doxorubicin and cyclophosphamide in breast cancer patients. *Clin Pharmacokinet* 2007;46(12):1051-  
25 68.
- 26
- 27
- 28
- 29
- 30
- 31
- 32
- 33
- 34
- 35
- 36
- 37
- 38
- 39
- 40
- 41
- 42
- 43
- 44
- 45
- 46
- 47
- 48
- 49
- 50
- 51
- 52
- 53
- 54
- 55
- 56
- 57
- 58
- 59
- 60

## Supplement 2 Dose adjustments in the i-GO study.

Individual dose adjustments and/or delays may be made based on the emergence of specific adverse events.

Adverse events consist of:

- Systemic toxicity
- Locoregional toxicity

### S2.1 Systemic toxicity

#### Myelosuppression

Dose adjustments in case of myelosuppression are summarized in figure S2-1.

If ANC  $< 1.5 \times 10^9/L$ , then the LTLD and cyclophosphamide doses will be held and re-evaluated for treatment in one week. Any second occurrence of ANC  $< 1.5 \times 10^9/L$  will require a decrease in LTLD dose to  $40 \text{ mg/m}^2$ . The cyclophosphamide will remain unchanged. LTLD and cyclophosphamide will be administered at day 14 (two weeks after the scheduled dose) if the ANC  $\geq 1.5 \times 10^9/L$ . In case of recurrence of ANC  $< 1.5 \times 10^9/L$  with the decreased LTLD dose, study participation will end and the patient will continue treatment with the standard of care AC regimen.

If platelets are  $< 100 \times 10^9/L$ , then the LTLD and cyclophosphamide doses will be held and re-evaluated for treatment in one week. Any second occurrence of platelets  $< 100 \times 10^9/L$  will require a decrease in LTLD dose to  $40 \text{ mg/m}^2$ . The cyclophosphamide will remain unchanged. These doses will be administered at day 14 (two weeks after the scheduled dose) if the platelets are  $\geq 100 \times 10^9/L$ . In case of recurrence of platelets  $< 100 \times 10^9/L$  with the decreased LTLD dose, study participation will end and the patient will continue treatment with the standard of care AC regimen.

If a patient requires drug-withholding for more than 14 days, then the patient will be withdrawn from the study.

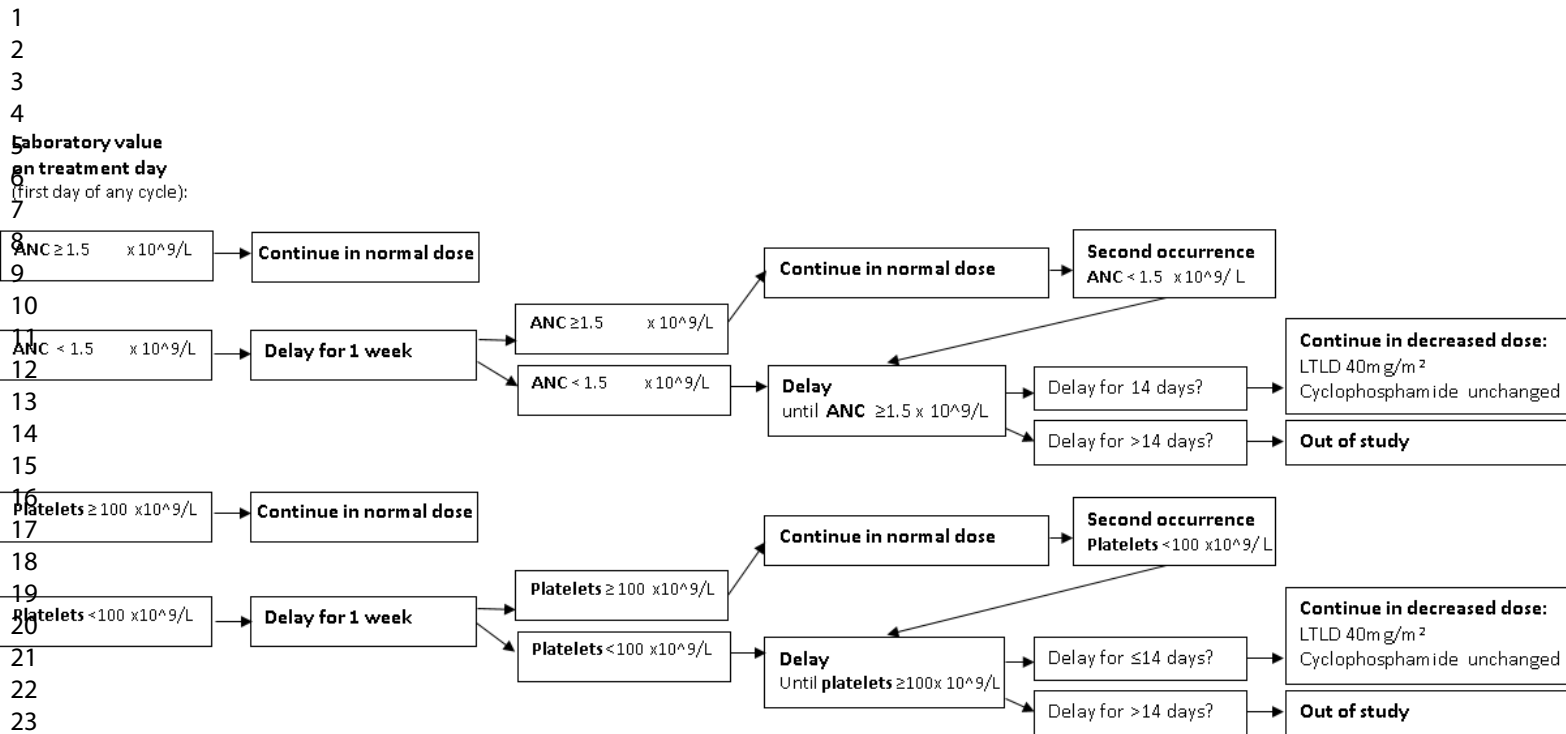

**Figure S2.1: Flow chart of dose adjustments for myelosuppression**

**Hypersensitivity reactions**

No dose reductions will be made for hypersensitivity reactions.

**Table S2: Suggested Management for Hypersensitivity Reactions**

| Severity of Symptoms                                                                                                                                                                                                                                                        | Treatment Guidelines                                                                                                                                                   |
|-----------------------------------------------------------------------------------------------------------------------------------------------------------------------------------------------------------------------------------------------------------------------------|------------------------------------------------------------------------------------------------------------------------------------------------------------------------|
| <u>Mild</u> symptoms: localized cutaneous reactions such as mild pruritus, mild flushing, mild rash (Grades 0-1)                                                                                                                                                            | Consider decreasing the rate of infusion until recovery from symptoms, stay at bedside and monitor patient<br>Complete study drug infusion at the initial planned rate |
| <u>Moderate to Severe</u> symptoms: any symptom that is not mild (see list above) such as generalized pruritus, generalized flushing, generalized rash, dyspnea, hypotension with systolic BP < 80 mm Hg, bronchospasm, angioedema and generalized angioedema. (Grades 2-4) | WITHDRAW FROM STUDY                                                                                                                                                    |
| <u>Anaphylaxis</u> (Grade 4)                                                                                                                                                                                                                                                | WITHDRAW FROM STUDY                                                                                                                                                    |

### Abnormal Liver Tests

If a patient develops abnormal liver tests, they will be evaluated for causal factors such as bile duct obstruction or liver pathology, with an abdominal ultrasound. If a cause is found, this must be resolved before continuing the treatment. If no other cause than the study treatment is found (or the cause cannot be resolved), patients will have the following dose reductions (summarized in figure S2-2).

If bilirubin  $\geq 25$   $\mu\text{mol/L}$ , then the LTLD and cyclophosphamide doses will be held and re-evaluated for treatment in one week. Any second occurrence of bilirubin  $\geq 25$   $\mu\text{mol/L}$  will require a dose adjustment to  $40\text{mg/m}^2$  LTLD. If the bilirubin is still  $25\text{-}50$   $\mu\text{mol/L}$  after one week, the patient will be treated with a decrease in LTLD dose to  $25$   $\text{mg/m}^2$  (50% of the original dose) and unchanged cyclophosphamide dose. If the bilirubin has normalized  $< 25$   $\mu\text{mol/L}$  after one week, the patient will be treated with a decrease in LTLD dose to  $40$   $\text{mg/m}^2$ , the cyclophosphamide dose will remain unchanged. In case bilirubin  $\geq 25$   $\mu\text{mol/L}$  recurs after previous LTLD dose reduction, study participation will end and the patient will continue treatment with the standard of care AC regimen.

If the bilirubin  $\geq 50$   $\mu\text{mol/L}$ , treatment will be delayed until  $< 50$   $\mu\text{mol/L}$ . If a patient requires drug-withholding for more than 14 days, then she will be withdrawn from the study.

If bilirubin  $< 25\mu\text{mol/L}$  and AF  $\leq 600$  U/L, but ASAT and ALAT are mildly elevated ( $1.6\text{-}3.5\text{xULN}$ ), the patient will be treated with a decrease in LTLD dose to  $40$   $\text{mg/m}^2$  and unchanged cyclophosphamide dose, without delay. In case mildly elevated ASAT or ALAT recur after previous LTLD dose reduction, study participation will end and the patient will continue treatment with the standard of care AC regimen.

If AF  $> 5\text{xULN}$  ( $>600\text{U/L}$ ) or ASAT  $> 3,5\text{xULN}$  ( $>105\text{U/L}$ ) or ALAT  $> 3,5\text{xULN}$  ( $>123$  U/L), treatment will be delayed until liver tests have recovered (bili  $< 25$   $\mu\text{mol/L}$ , AF  $\leq 5\text{xULN}$  and ASAT/ALAT  $\leq 3.5\text{xULN}$ ). Then the patient will be treated with a decrease in LTLD dose to  $40$   $\text{mg/m}^2$  and unchanged cyclophosphamide dose. In case the elevated AF ( $> 5\text{xULN}$ ), ASAT ( $> 3,5\text{xULN}$ ) or ALAT ( $> 3,5\text{xULN}$ ) recur after the LTLD dose reduction, study participation will end and the patient will continue treatment with the standard of care AC regimen.

If a patient requires drug-withholding for more than 14 days, then she will be withdrawn from the study.

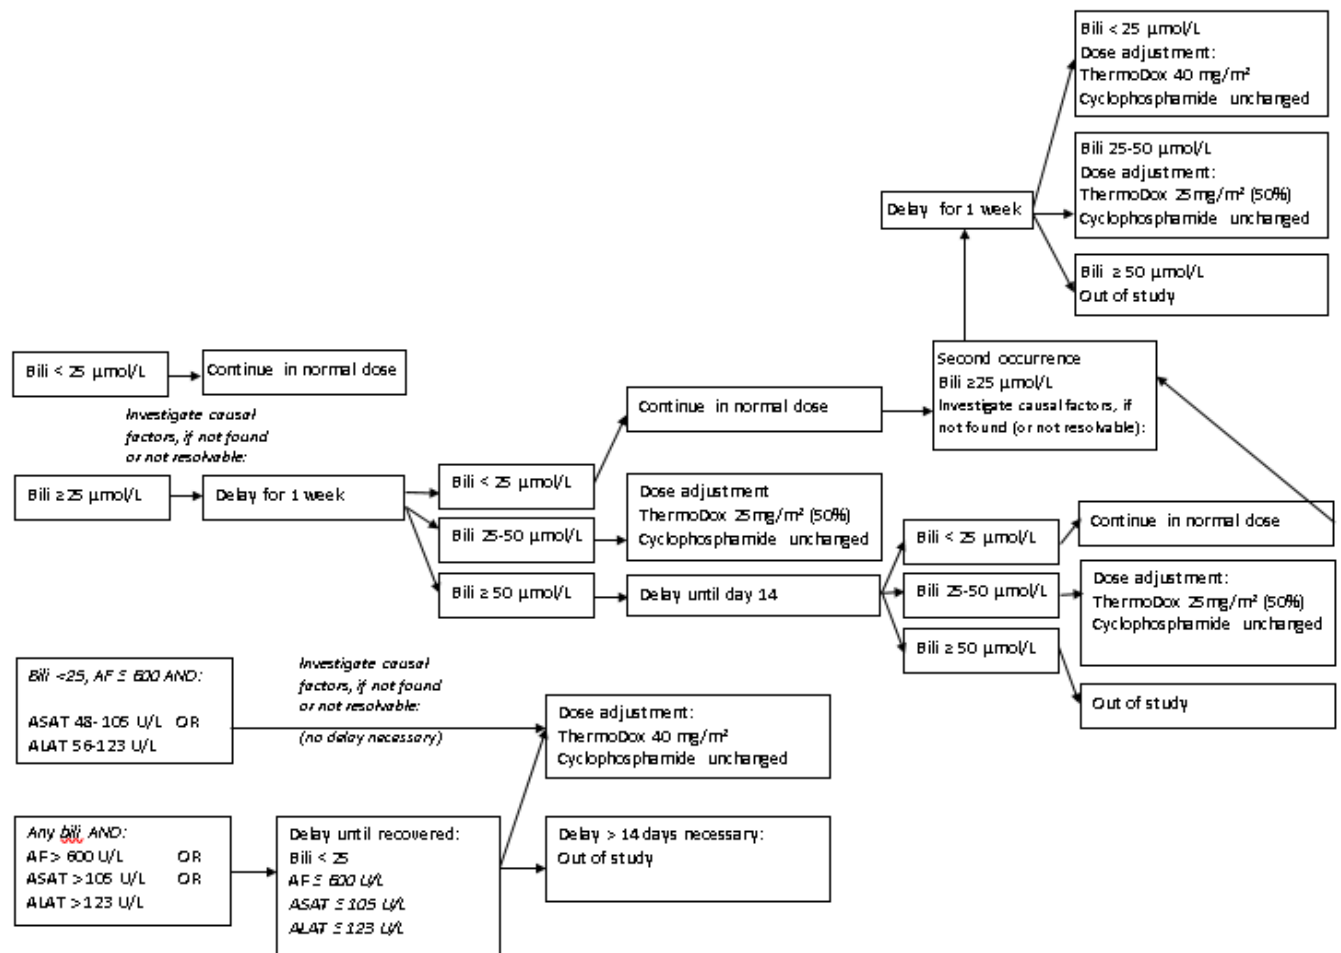

**Figure S2.2: Flow chart of dose adjustments for abnormal liver tests**

### Mucositis

If mucositis is present on any treatment day, then treatment should be held until mucositis has resolved. If mucositis of Grade  $\geq 3$  occurs, then reduce the dose of LTLD to  $40 \text{ mg/m}^2$ , while the cyclophosphamide dose remains unchanged for subsequent cycles. In case mucositis of grade  $\geq 3$  recurs after the LTLD dose reduction, study participation will end and the patient will continue treatment with the standard of care AC regimen. If a patient requires drug-withholding for more than 14 days, then the patient will be withdrawn from the study.

### Ventricular Function

Patients who are receiving protocol therapy will be removed from study treatment under the following conditions:

Signs (tachycardia, S3, elevated jugular venous pressure) AND symptoms of congestive heart failure (edema, dyspnea, paroxysmal nocturnal dyspnea, orthopnea) OR  
 a decline in LVEF of  $> 15\%$  while the LVEF remains  $> 40\%$  OR  
 a decline to an LVEF of  $\leq 40\%$ .

Patients in this category should be followed with an ejection fraction assessment every three months until stable.

## Other adverse events

For other non-hematologic toxicity  $\geq$  grade 3, no dose modification is required. Instead, such subjects will not be re-treated until the severity of the non-hematologic toxicity drops to  $\leq$  grade 1. If a patient requires drug-withholding for more than 14 days, then the patient will be removed from the trial.

## S2.2 Locoregional toxicity

### Post-procedural pain

If a patient experiences post-procedural pain in the treated breast with:

- a Numeric Rate Scale (NRS) of 7 or higher (severe pain) for more than 60 minutes within 24u hours without pain medication, OR
- a NRS of 5 or higher (moderate to severe pain) for more than 60 minutes within 24u hours that does not respond to adequate pain medication,
- Any pain that the patients finds unacceptable or unbearable

then in the next cycle the hyperthermia time will be reduced by 25%: 45 minutes of MR-HIFU treatment. This level of pain is also considered a dose limiting loco-regional toxicity (loco-regional DLT).

If the patient experiences the above specified level of pain again after the hyperthermia time reduction, de time will be reduced further to 30 minutes of MR-HIFU treatment.

If the above specified level of pain still persists/recurs the patient will be withdrawn from the trial.

### Skin effects

If a grade 1 (CTCAE) skin burn is occurs on the treated breast on any treatment day, then treatment should be held until the skin burn has resolved.

If a patient requires treatment withholding for more than 14 days, then the patient will be removed from the trial.

If the skin burn is resolved in  $\leq$  14 days the hyperthermia time in the next cycle will be reduced by 25%: 45 minutes of MR-HIFU treatment. If a grade 1 skin burn recurs after dose reduction the hyperthermia time will be further reduced to 30 minutes of MR-HIFU treatment. If the burn recurs after that, the patient will be withdrawn from the study.

If a grade 2 burn occurs on the treated breast the patient will immediately be withdrawn from the study.

For other adverse effects of the skin of the treated breast, that are suspected to be related to the study treatment, treatment will be delayed until the severity of the skin toxicity drops to  $\leq$  grade 1. The hyperthermia time will be reduced by 25% in the next cycle. If a patient requires treatment withholding for more than 14 days, then the patient will be removed from the trial. Skin burns and other adverse effects of the skin of the treated breast of grade 1 or higher are considered dose limiting loco-regional toxicities (loco-regional DLTs).

## S2.3 Dose adjustments, dose delay or withdrawal from study, based on technical difficulties



1  
2  
3 In the study design we specified that we aim to perform 60 minutes of hyperthermia to the  
4 primary tumor at a temperature of 40°C-42°C, however, the ability to achieve this is also a  
5 feasibility parameter. It is possible that in certain patients, the aim will not be achieved, which  
6 will lead to an individual (unintended) adjustment of hyperthermia dose in that case.  
7 Furthermore, if MR-thermometry is insufficiently accurate to provide a safe MR-HIFU  
8 treatment, that treatment is stopped for safety reasons and the patient will receive the  
9 standard treatment of doxorubicin and cyclophosphamide.  
10 If we experience technical difficulties during the MR-HIFU treatment (such as dysfunction of  
11 the MR-HIFU method, loss of power, mechanical difficulties) and we cannot guarantee the  
12 safety and feasibility of an individual patient's MR-HIFU treatment, the patient will receive the  
13 standard treatment of doxorubicin and cyclophosphamide.  
14  
15  
16  
17  
18

19 After the technical difficulties have been resolved, the patient can still receive MR-HIFU and  
20 LTLD in the next treatment cycle or cycles.

21 If for one patient, hyperthermia treatment was for any reason insufficient (i.e. the target  
22 temperature 40-42°C was not reached or was only maintained for less than 30 minutes), in two  
23 separate treatment cycles, the patient will be excluded from the study, because the treatment  
24 is not considered feasible for that patient.  
25  
26  
27

28 If the target temperature of 40-42°C is not reached, LTLD will not be administered (paragraph  
29 8.3.15). Instead, conventional doxorubicin will be administered. However, if the temperature is  
30 initially reached, LTLD infusion is started and shortly afterwards the temperature becomes and  
31 remains insufficient, LTLD infusion will be continued as planned. In this case it is no longer  
32 possible to replace LTLD with conventional doxorubicin, as this would lead to an unreliable  
33 dose. If this scenario occurs twice the patient will be excluded from the study, as described  
34 above.  
35  
36  
37  
38  
39  
40  
41  
42  
43  
44  
45  
46  
47  
48  
49  
50  
51  
52  
53  
54  
55  
56  
57  
58  
59  
60

### Supplement 3 Restrictions to concomitant medications and products

Concurrent use of any of the following medications is strictly prohibited: protease inhibitors, cyclosporine, carbamazepine, phenytoin, valproic acid, paclitaxel, trastuzumab and other liposomal drugs (Abelect™, Ambisome™, Nyotran™, etc.) or lipid-complexed drugs

Doxorubicin is a substrate of CYP3A4, CYP2D6 and P-glycoprotein (P-gp). As detailed in in table S3-1, inducers and inhibitors of these enzymes, as well as medication that acts with doxorubicin via other pathways could result in drug interactions. Caution will be exercised with regard to all the medications mentioned in table S3-1, for interactions are theoretically possible. If deemed necessary, clinically safe and feasible, these medications will be withheld or substituted before participation in the study.

Pre-specified exceptions were made for cyclophosphamide, dexamethasone, propofol, aprepitant and clemastine. These medications will be used as explained in appendix C.

Liposomal drugs (Abelect™, Ambisome™, Nyotran™, etc.), or lipid-complexed drugs, or intravenous fat emulsions could change the pharmacokinetic profile of LTLD and should not be administered to study subjects while on the trial.

Subjects may take any medication that is not restricted by the protocol and would not be expected to interfere with the intent and conduct of the study. Chronic medications should be dosed on a stable regimen, if possible. In case of medications restricted by the protocol, adequate washout times must be observed. All medications at the time of screening and within 30 days prior to study treatment and other treatments taken by the subject during the study, including those treatments initiated prior to enrollment (ICF signing), must be recorded.

**Table S3.1 Concomitant medications and products with possible interactions**

| Sources: (1-6)                        | Increased risk of toxicity               | CYP3A4    | CYP2D6 | P-gp      | Wash-out |
|---------------------------------------|------------------------------------------|-----------|--------|-----------|----------|
| <b>Antineoplastic therapy</b>         |                                          |           |        |           |          |
| bortezomib                            |                                          | inhibitor |        |           |          |
| cyclophosphamide <sup>1</sup>         | Cardiotoxicity /<br>hemorrhagic cystitis | inhibitor |        |           |          |
| cytarabine                            | Miscellaneous <sup>2</sup>               |           |        |           |          |
| dasatinib                             |                                          | inhibitor |        |           |          |
| docetaxel                             |                                          | inhibitor |        |           |          |
| etoposide                             |                                          | inhibitor |        |           |          |
| 5-fluorouracil                        | Cardiotoxicity                           |           |        |           |          |
| ifosfamide                            |                                          | inhibitor |        |           |          |
| imatinib                              |                                          | inhibitor |        |           |          |
| lapatinib                             |                                          |           |        | inhibitor |          |
| lomustine                             |                                          | inhibitor |        |           |          |
| 6-mercaptopurin:<br>6-MP / purinethol | Hepatotoxicity                           |           |        |           |          |
| methotrexate                          | Hepatotoxicity                           |           |        |           |          |
| methoxsalen                           |                                          | inhibitor |        |           |          |
| mitoxantrone                          |                                          | inhibitor |        |           |          |
| nafeillin                             |                                          | inducer   |        |           |          |
| paclitaxel                            | Cardiotoxicity                           |           |        |           |          |
| plicamycin***                         | Hematologic                              |           |        |           |          |
| nifamycin agents (all)                |                                          | inducer   |        |           | 14 days  |
| nifabutin                             |                                          | inducer** |        |           | 14 days  |
| nifampicin                            |                                          | inducer** |        | inducer** | 14 days  |
| nifapentine                           |                                          | inducer   |        |           | 14 days  |

<sup>1</sup> Pre-specified exceptions are described below

<sup>2</sup> Necrotizing colitis manifested by typhlitis (caecal inflammation), bloody stools, and severe and sometimes fatal infections have been associated with a combination of doxorubicin given by intravenous push daily for 3 days and cytarabine given by continuous infusion daily for 7 or more days. Source: Pfizer 2010.

\* Mentioned as powerful inhibitor/inducer in the KNMP Kennisbank.

Note: Relevance of an interaction also depends on properties of the substrate, such as therapeutic width, biological availability or another route of metabolism.

[https://kennisbank.knmp.nl/article/Informatorium\\_Medicamentorum/G1126.htm](https://kennisbank.knmp.nl/article/Informatorium_Medicamentorum/G1126.htm)

\*\* Mentioned as inhibitor/inducer in the KNMP Kennisbank

[https://kennisbank.knmp.nl/article/Informatorium\\_Medicamentorum/G1126.htm](https://kennisbank.knmp.nl/article/Informatorium_Medicamentorum/G1126.htm)

\*\*\* Prohibited medication in the Phase I trial at Duke (IND#74,188)

**Table S3.1 Concomitant medications and products with possible interactions (continued)**

|                                      | Increased risk of toxicity                                                            | CYP3A4    | CYP2D6    | P-gp        | Wash-out |
|--------------------------------------|---------------------------------------------------------------------------------------|-----------|-----------|-------------|----------|
| sorafenib <sup>3</sup>               | Possible dose modification                                                            |           |           |             |          |
| streptozocin***                      | Hematologic                                                                           |           |           |             |          |
| teniposide                           |                                                                                       | inhibitor |           |             |          |
| trastuzumab                          | Cardiotoxicity                                                                        |           |           |             | 24 weeks |
| vinblastine                          |                                                                                       | inhibitor |           |             |          |
| vincristine                          |                                                                                       | inhibitor |           |             |          |
| vinorelbine                          |                                                                                       | inhibitor |           |             |          |
| <b>(anti-) Hormonal medication</b>   |                                                                                       |           |           |             |          |
| abirateron                           |                                                                                       |           | inhibitor |             |          |
| anastrozole                          |                                                                                       | inhibitor |           |             |          |
| danazol                              |                                                                                       | inhibitor |           |             |          |
| drospirenone                         |                                                                                       | inhibitor |           |             |          |
| ethinyl estradiol                    |                                                                                       | inhibitor |           |             |          |
| mestranol                            |                                                                                       | inhibitor |           |             |          |
| mifepristone                         |                                                                                       | inhibitor |           |             |          |
| progesterone <sup>4</sup>            | Hematologic                                                                           | inhibitor |           |             |          |
| tamoxifen                            |                                                                                       | inhibitor |           |             |          |
| testosterone                         |                                                                                       | inhibitor |           |             |          |
| <b>Calcium channel blockers</b>      |                                                                                       |           |           |             |          |
| amlodipine                           |                                                                                       | inhibitor |           |             |          |
| diltiazem                            | Cardiotoxicity                                                                        | inhibitor |           |             | 7 days   |
| felodipine                           |                                                                                       | inhibitor |           |             |          |
| nicardipine (cardene)                |                                                                                       | inhibitor |           |             |          |
| nifedipine                           |                                                                                       | inhibitor |           |             |          |
| nisoldipine                          |                                                                                       | inhibitor |           |             |          |
| verapamil                            | Cardiotoxicity                                                                        | inhibitor |           | inhibitor** | 7 days   |
|                                      | <i>Hospital pharmacist's advice: in case of this interaction, no action is needed</i> |           |           |             |          |
| <b>Bêtablockers</b>                  |                                                                                       |           |           |             |          |
| propranolol                          | Cardiotoxicity                                                                        |           |           |             |          |
| carvedilol                           |                                                                                       |           |           | inhibitor   |          |
| <b>Angiotensin receptor blockers</b> |                                                                                       |           |           |             |          |
| irbesartan                           |                                                                                       | inhibitor |           |             |          |
| losartan                             |                                                                                       | inhibitor |           |             |          |

<sup>3</sup> In clinical studies, both an increase of 21% and 47%, and no change in the AUC of doxorubicin were observed with concomitant treatment with sorafenib 400 mg twice daily. The clinical significance of these findings is unknown. Source: Pfizer 2010.

<sup>4</sup> In a published study, progesterone was given intravenously to patients with advanced malignancies (ECOG PS< 2 ) at high doses (up to 10 g over 24 hours) 12 concomitantly with a fixed doxorubicin dose (60 mg/m<sup>2</sup>) via bolus injection. Enhanced doxorubicin-induced neutropenia and thrombocytopenia were observed. Source: Pfizer 2010.

\* Mentioned as powerful inhibitor/inducer in the KNMP Kennisbank.

Note: Relevance of an interaction also depends on properties of the substrate, such as therapeutical width, biological availability or another route of metabolism.

[https://kennisbank.knmp.nl/article/Informatorium\\_Medicamentorum/G1126.html](https://kennisbank.knmp.nl/article/Informatorium_Medicamentorum/G1126.html)

\*\* Mentioned as inhibitor/inducer in the KNMP Kennisbank

[https://kennisbank.knmp.nl/article/Informatorium\\_Medicamentorum/G1126.html](https://kennisbank.knmp.nl/article/Informatorium_Medicamentorum/G1126.html)

\*\*\* Prohibited medication in the Phase I trial at Duke (IND#74,188)

**Table S3.1 Concomitant medications and products with possible interactions (continued)**

| <b>Anti-arrhythmic agents</b>                                                                                                                                                               |                                   |                        |                        |             |                 |
|---------------------------------------------------------------------------------------------------------------------------------------------------------------------------------------------|-----------------------------------|------------------------|------------------------|-------------|-----------------|
|                                                                                                                                                                                             | <b>Increased risk of toxicity</b> | <b>CYP3A4</b>          | <b>CYP2D6</b>          | <b>P-gp</b> | <b>Wash-out</b> |
| amiodarone                                                                                                                                                                                  |                                   | inhibitor              | inhibitor              | inhibitor** | 6 months        |
| dronedarone                                                                                                                                                                                 |                                   |                        | inhibitor              | inhibitor   |                 |
| propafenone                                                                                                                                                                                 |                                   |                        | inhibitor              | inhibitor   |                 |
| quinidine (kinidine)                                                                                                                                                                        |                                   | inhibitor              | powerful*<br>inhibitor | inhibitor** |                 |
|                                                                                                                                                                                             |                                   |                        |                        |             |                 |
| <b>Statins</b>                                                                                                                                                                              |                                   |                        |                        |             |                 |
| atorvastatin                                                                                                                                                                                |                                   | inhibitor              |                        |             |                 |
| fluvastatin                                                                                                                                                                                 |                                   | inhibitor              |                        |             |                 |
| lovastatin                                                                                                                                                                                  |                                   | inhibitor              |                        |             |                 |
| pravastatin                                                                                                                                                                                 |                                   | inhibitor              |                        |             |                 |
|                                                                                                                                                                                             |                                   |                        |                        |             |                 |
| <b>Anticonvulsants</b>                                                                                                                                                                      |                                   |                        |                        |             |                 |
| <i>Hospital pharmacist's advice: the concentration of phenytoin and other antiepileptics can be affected by oncolytics, decreasing the antiepileptic effect. Dose adjustment is needed.</i> |                                   |                        |                        |             |                 |
| barbiturate agents                                                                                                                                                                          |                                   | inducer                |                        |             |                 |
| <i>Hospital pharmacist's advice: interaction is only theoretical, no action is needed</i>                                                                                                   |                                   |                        |                        |             |                 |
| carbamazepine <sup>5</sup>                                                                                                                                                                  |                                   | inducer**              |                        | inducer**   |                 |
| fosphenytoin <sup>5</sup>                                                                                                                                                                   |                                   | inducer                |                        |             |                 |
| pentobarbital                                                                                                                                                                               |                                   | inducer                |                        |             |                 |
| phenobarbital ***                                                                                                                                                                           |                                   | inducer**              |                        | inducer**   |                 |
| phenytoin <sup>5***</sup>                                                                                                                                                                   |                                   | inducer**              |                        | inducer**   |                 |
| primidone                                                                                                                                                                                   |                                   | inducer**              |                        | inducer**   |                 |
| oxcarbazepine                                                                                                                                                                               |                                   | inducer                |                        |             |                 |
| valproic acid (depakine) <sup>5</sup>                                                                                                                                                       |                                   | inhibitor              |                        |             |                 |
|                                                                                                                                                                                             |                                   |                        |                        |             |                 |
| <b>Antidepressants</b>                                                                                                                                                                      |                                   |                        |                        |             |                 |
| bupropion                                                                                                                                                                                   |                                   |                        | powerful*<br>inhibitor |             |                 |
| desipramine                                                                                                                                                                                 |                                   | inhibitor              |                        |             |                 |
| duloxetine                                                                                                                                                                                  |                                   |                        | inhibitor              |             |                 |
| fluoxetine                                                                                                                                                                                  |                                   | powerful*<br>inhibitor |                        |             |                 |
| fluvoxamine                                                                                                                                                                                 |                                   | inhibitor              |                        |             | 7 days          |
| mirtazapine                                                                                                                                                                                 |                                   | inhibitor              |                        |             |                 |
| nefazodone                                                                                                                                                                                  |                                   | inhibitor              |                        |             | 7 days          |
| norfluoxetine                                                                                                                                                                               |                                   | ?                      | inhibitor              |             |                 |
| paroxetine                                                                                                                                                                                  |                                   | inhibitor              | powerful*<br>inhibitor |             |                 |
| selegiline                                                                                                                                                                                  |                                   | inhibitor              |                        |             |                 |
| sertraline                                                                                                                                                                                  |                                   | inhibitor              | inhibitor              |             |                 |
| tranylcypromine                                                                                                                                                                             |                                   | inhibitor              |                        |             |                 |
| trazodone                                                                                                                                                                                   |                                   | inhibitor              |                        |             |                 |
| venlafaxine                                                                                                                                                                                 |                                   | inhibitor              |                        |             |                 |

<sup>5</sup> The levels of carbamazepine, phenytoin and valproic acid can temporarily be affected by doxorubicin, with the risk of sub effective anti-epileptic dosage.

\* Mentioned as powerful inhibitor/inducer in the KNMP Kennisbank.

Note: Relevance of an interaction also depends on properties of the substrate, such as therapeutic width, biological availability or another route of metabolism.

[https://kennisbank.knmp.nl/article/Informatorium\\_Medicamentorum/G1126.html](https://kennisbank.knmp.nl/article/Informatorium_Medicamentorum/G1126.html)

\*\* Mentioned as inhibitor/inducer in the KNMP Kennisbank

[https://kennisbank.knmp.nl/article/Informatorium\\_Medicamentorum/G1126.html](https://kennisbank.knmp.nl/article/Informatorium_Medicamentorum/G1126.html)

\*\*\* Prohibited medication in the Phase I trial at Duke (IND#74,188)

**Table S3.1 Concomitant medications and products with possible interactions (continued)**

|                                  | Increased risk of toxicity                                                                               | CYP3A4                 | CYP2D6        | P-gp         | Wash-out        |
|----------------------------------|----------------------------------------------------------------------------------------------------------|------------------------|---------------|--------------|-----------------|
| <b>Antipsychotics</b>            |                                                                                                          |                        |               |              |                 |
| clozapine                        | Hematologic                                                                                              | inhibitor              |               |              |                 |
| haloperidol                      |                                                                                                          | inhibitor              |               |              |                 |
| olanzapine                       |                                                                                                          | inhibitor              |               |              |                 |
| pimozide                         |                                                                                                          | inhibitor              |               |              |                 |
|                                  | <b>Increased risk of toxicity</b>                                                                        | <b>CYP3A4</b>          | <b>CYP2D6</b> | <b>P-gp</b>  | <b>Wash-out</b> |
| risperidone                      |                                                                                                          | inhibitor              |               |              |                 |
| ziprasidone                      |                                                                                                          | inhibitor              |               |              |                 |
|                                  |                                                                                                          |                        |               |              |                 |
| <b>Thyrestatics ***</b>          |                                                                                                          |                        |               |              |                 |
| thionamids: e.g.                 | Hematologic                                                                                              |                        |               |              |                 |
| carbimazole                      | Hematologic                                                                                              |                        |               |              |                 |
| propylthiouracil                 | Hematologic                                                                                              |                        |               |              |                 |
| thiamazol / methimazole          | Hematologic                                                                                              | inhibitor              |               |              |                 |
|                                  |                                                                                                          |                        |               |              |                 |
| <b>Immune suppressive agents</b> |                                                                                                          |                        |               |              |                 |
| azathioprine***                  | Hematologic /<br>Immune suppressive                                                                      |                        |               |              |                 |
| cyclosporine/cyclosporine<br>*** | Immune suppressive                                                                                       | inhibitor              |               | inhibitor**  |                 |
|                                  | <i>Hospital pharmacist's advice: The combination of anthracyclines and ciclosporin should be avoided</i> |                        |               |              |                 |
| interferon                       | Hematologic                                                                                              |                        |               |              |                 |
| sirolimus                        |                                                                                                          | inhibitor              |               |              |                 |
| tacrolimus                       |                                                                                                          | inhibitor              |               |              |                 |
|                                  |                                                                                                          |                        |               |              |                 |
| <b>Antibiotics</b>               |                                                                                                          |                        |               |              |                 |
| azithromycin                     |                                                                                                          | inhibitor              |               |              |                 |
| chloramphenicol***               | Hematologic                                                                                              | inhibitor              |               |              |                 |
| clarithromycin                   |                                                                                                          | powerful*<br>inhibitor |               | inhibitor    | 7 days          |
| ciprofloxacin                    |                                                                                                          | inhibitor              |               |              |                 |
| doxycycline                      |                                                                                                          | inhibitor              |               |              |                 |
| erythromycin                     |                                                                                                          | powerful*<br>inhibitor |               | inhibitor ** | 7 days          |
| norfloxacin                      |                                                                                                          | inhibitor              |               |              |                 |
| quinupristin                     |                                                                                                          | inhibitor              |               |              |                 |
| telithromycin                    |                                                                                                          | inhibitor              |               |              |                 |
| tetracycline                     |                                                                                                          | inhibitor              |               |              |                 |
| troleandomycin                   |                                                                                                          | inhibitor              |               |              | 7 days          |
|                                  |                                                                                                          |                        |               |              |                 |
| <b>Antimycotics</b>              |                                                                                                          |                        |               |              |                 |
| amphotericin B***                | Nephrotoxicity                                                                                           |                        |               |              |                 |
| clotrimoxazole                   |                                                                                                          | inhibitor              |               |              |                 |
| fluconazole                      |                                                                                                          | inhibitor              |               |              | 7 days          |
| flucytosine***                   | Hematologic                                                                                              |                        |               |              |                 |
| itraconazole                     |                                                                                                          | powerful*<br>inhibitor |               | inhibitor    | 7 days          |
| ketoconazole                     |                                                                                                          | powerful*<br>inhibitor |               | inhibitor**  | 7 days          |

\* Mentioned as powerful inhibitor/inducer in the KNMP Kennisbank.

Note: Relevance of an interaction also depends on properties of the substrate, such as therapeutic width, biological availability or another route of metabolism.

[https://kennisbank.knmp.nl/article/Informatorium\\_Medicamentorum/G1126.html](https://kennisbank.knmp.nl/article/Informatorium_Medicamentorum/G1126.html)

\*\* Mentioned as inhibitor/inducer in the KNMP Kennisbank

[https://kennisbank.knmp.nl/article/Informatorium\\_Medicamentorum/G1126.html](https://kennisbank.knmp.nl/article/Informatorium_Medicamentorum/G1126.html)

\*\*\* Prohibited medication in the Phase I trial at Duke (IND#74,188)

**Table S3.1 Concomitant medications and products with possible interactions (continued)**

|                                                                                                                                                                                        | Increased risk of toxicity | CYP3A4                 | CYP2D6                 | P-gp        | Wash-out |
|----------------------------------------------------------------------------------------------------------------------------------------------------------------------------------------|----------------------------|------------------------|------------------------|-------------|----------|
| metronidazole                                                                                                                                                                          |                            | inhibitor              |                        |             |          |
| miconazole                                                                                                                                                                             |                            | inhibitor              |                        |             |          |
| posaconazol                                                                                                                                                                            |                            | inhibitor              |                        |             |          |
| sulconazole                                                                                                                                                                            |                            | inhibitor              |                        |             |          |
| terbinafine                                                                                                                                                                            |                            |                        | inhibitor              |             |          |
| voriconazole                                                                                                                                                                           |                            | powerful*<br>inhibitor |                        |             | 7 days   |
| <b>Anti (retro-) viral agents</b>                                                                                                                                                      |                            |                        |                        |             |          |
| <i>Hospital pharmacist's advice: In case of HIV-protease inhibitors, the interaction will always be discussed with the local pharmacist, doxorubicin is discouraged in this group.</i> |                            |                        |                        |             |          |
| atazanavir                                                                                                                                                                             |                            | Inhibitor              |                        |             |          |
| amprenavir                                                                                                                                                                             |                            | Inhibitor              |                        |             | 7 days   |
| boceprevir                                                                                                                                                                             |                            | Inhibitor              |                        |             |          |
| cobicistat                                                                                                                                                                             |                            | powerful*<br>inhibitor |                        | inhibitor** |          |
| delavirdine                                                                                                                                                                            |                            | Inhibitor              |                        |             | 7 days   |
| efavirenz                                                                                                                                                                              |                            | inducer                |                        |             |          |
| fosamprenavir                                                                                                                                                                          |                            | Inhibitor              |                        |             |          |
| ganciclovir***                                                                                                                                                                         | Hematologic                |                        |                        |             |          |
| indinavir                                                                                                                                                                              |                            | Inhibitor              |                        |             | 7 days   |
| interferon***                                                                                                                                                                          | Hematologic                |                        |                        |             |          |
| lopinavir                                                                                                                                                                              |                            | Inhibitor              |                        | inhibitor** | 7 days   |
| nelfinavir                                                                                                                                                                             |                            | Inhibitor              |                        |             | 7 days   |
| nevirapine                                                                                                                                                                             |                            | Inducer                |                        |             |          |
| ritonavir                                                                                                                                                                              |                            | powerful*<br>Inhibitor | powerful*<br>inhibitor | inhibitor** | 7 days   |
| saquinavir                                                                                                                                                                             |                            | Inhibitor              |                        | inhibitor   | 7 days   |
| simeprevir                                                                                                                                                                             |                            |                        |                        | inhibitor** |          |
| telaprevir                                                                                                                                                                             |                            |                        |                        | inhibitor   |          |
| tipranavir                                                                                                                                                                             |                            |                        |                        | inhibitor   |          |
| zidovudine***                                                                                                                                                                          | Hematologic                |                        |                        |             |          |
| <b>Miscellaneous anti-infectious agents</b>                                                                                                                                            |                            |                        |                        |             |          |
| clofazimine                                                                                                                                                                            |                            | Inhibitor              |                        |             |          |
| isoniazid                                                                                                                                                                              |                            | Inhibitor              |                        |             |          |
| mefloquine                                                                                                                                                                             |                            | Inhibitor              |                        |             |          |
| pentamidine                                                                                                                                                                            |                            | Inhibitor              |                        |             |          |
| primaquine                                                                                                                                                                             |                            | Inhibitor              |                        |             |          |
| quinine (kinine)                                                                                                                                                                       |                            | Inhibitor              | inhibitor              |             |          |
| <b>Glucocorticoids<sup>6</sup></b>                                                                                                                                                     |                            |                        |                        |             |          |
| betamethasone                                                                                                                                                                          |                            | inducer                |                        |             |          |
| cortisone (> 50 mg)                                                                                                                                                                    |                            | inducer                |                        |             | 14 days  |
| dexamethasone (> 1.5 mg <sup>7</sup> )                                                                                                                                                 |                            | inducer                |                        | inducer     | 14 days  |

\* Mentioned as powerful inhibitor/inducer in the KNMP Kennisbank.

Note: Relevance of an interaction also depends on properties of the substrate, such as therapeutic width, biological availability or another route of metabolism.

[https://kennisbank.knmp.nl/article/Informatorium\\_Medicamentorum/G1126.html](https://kennisbank.knmp.nl/article/Informatorium_Medicamentorum/G1126.html)

\*\* Mentioned as inhibitor/inducer in the KNMP Kennisbank

[https://kennisbank.knmp.nl/article/Informatorium\\_Medicamentorum/G1126.html](https://kennisbank.knmp.nl/article/Informatorium_Medicamentorum/G1126.html)

\*\*\* Prohibited medication in the Phase I trial at Duke (IND#74,188)

**Table S3.1 Concomitant medications and products with possible interactions (continued)**

|                                                                                                      | Increased risk of toxicity | CYP3A4    | CYP2D6 | P-gp | Wash-out                |
|------------------------------------------------------------------------------------------------------|----------------------------|-----------|--------|------|-------------------------|
| hydrocortisone (> 40 mg)                                                                             |                            | inducer   |        |      | 14 days                 |
| methylprednisolone (>8mg <sup>§</sup> ),                                                             |                            | inducer   |        |      | 14 days                 |
| prednisolone                                                                                         |                            | inducer   |        |      |                         |
| prednisone (> 10 mg)                                                                                 |                            | inducer   |        |      | 14 days                 |
| <b>Sedatives</b>                                                                                     |                            |           |        |      |                         |
| dexmedetomidine                                                                                      |                            | inhibitor |        |      |                         |
| diazepam                                                                                             |                            | inhibitor |        |      |                         |
| midazolam                                                                                            |                            | inhibitor |        |      |                         |
| propofol <sup>¶</sup>                                                                                |                            | inhibitor |        |      |                         |
| <b>Pain medication</b>                                                                               |                            |           |        |      |                         |
| colchicine***                                                                                        | Hematologic                |           |        |      |                         |
| diclofenac                                                                                           |                            | inhibitor |        |      |                         |
| dihydroergotamine                                                                                    |                            | inhibitor |        |      |                         |
| ergotamine                                                                                           |                            | inhibitor |        |      |                         |
| Fentanyl                                                                                             |                            | inhibitor |        |      |                         |
| lidocaine                                                                                            |                            | inhibitor |        |      |                         |
| paracetamol                                                                                          |                            | inhibitor |        |      |                         |
| <i>Hospital pharmacists advice: This interaction is not clinically relevant, no action is needed</i> |                            |           |        |      |                         |
| <b>Antacids</b>                                                                                      |                            |           |        |      |                         |
| <i>Hospital pharmacists advice: This interaction is not clinically relevant, no action is needed</i> |                            |           |        |      |                         |
| rennies                                                                                              | Modify gastric acidity     |           |        |      | 1 hour before and after |
| mylanta / maalox (aluminum hydroxide, magnesium hydroxide simethicone)                               | Modify gastric acidity     |           |        |      | 1 hour before and after |
| tums                                                                                                 | Modify gastric acidity     |           |        |      | 1 hour before and after |
| <b>Other GI agents</b>                                                                               |                            |           |        |      |                         |
| aprepitant <sup>10</sup>                                                                             |                            | inhibitor |        |      | 7 days                  |

<sup>§</sup> Methylprednisolone at a single high dose (32mg) did not affect CYP3A4 activity and treatment with 8mg methylprednisolone daily for 9 days did not result in clinically significant induction of CYP3A3. (Villikka et al 2001)

\* Mentioned as powerful inhibitor/inducer in the KNMP Kennisbank.

Note: Relevance of an interaction also depends on properties of the substrate, such as therapeutical width, biological availability or another route of metabolism.

[https://kennisbank.knmp.nl/article/Informatorium\\_Medicamentorum/G1126.html](https://kennisbank.knmp.nl/article/Informatorium_Medicamentorum/G1126.html)

\*\* Mentioned as inhibitor/inducer in the KNMP Kennisbank

[https://kennisbank.knmp.nl/article/Informatorium\\_Medicamentorum/G1126.html](https://kennisbank.knmp.nl/article/Informatorium_Medicamentorum/G1126.html)

\*\*\* Prohibited medication in the Phase I trial at Duke (IND#74,188)



**Table S3.1 Concomitant medications and products with possible interactions (continued)**

|                                                                                             | Increased risk of toxicity                                                                           | CYP3A4         | CYP2D6         | P-gp           | Wash-out |
|---------------------------------------------------------------------------------------------|------------------------------------------------------------------------------------------------------|----------------|----------------|----------------|----------|
| cimetidine                                                                                  |                                                                                                      | inhibitor      | inhibitor      |                | 7 days   |
| lansoprazole                                                                                |                                                                                                      | inhibitor      |                | inhibitor      |          |
| nizatidine                                                                                  |                                                                                                      | inhibitor      |                |                |          |
| omeprazole                                                                                  |                                                                                                      | inhibitor      |                | inhibitor      |          |
|                                                                                             | <i>Hospital pharmacists advice: This interaction is not clinically relevant, no action is needed</i> |                |                |                |          |
| pantoprazole                                                                                |                                                                                                      |                |                | inhibitor      |          |
| rabeprazole                                                                                 |                                                                                                      | inhibitor      |                |                |          |
|                                                                                             |                                                                                                      |                |                |                |          |
| <b>Histamine antagonists</b>                                                                |                                                                                                      |                |                |                |          |
| azelastine                                                                                  |                                                                                                      | inhibitor      |                |                |          |
| cimetidine                                                                                  |                                                                                                      | inhibitor      |                |                |          |
| clemapastine <sup>11</sup>                                                                  |                                                                                                      | inhibitor      |                |                |          |
| diphenhydramine                                                                             |                                                                                                      |                | inhibitor      |                |          |
|                                                                                             |                                                                                                      |                |                |                |          |
| <b>Herbal or dietary ingredients or supplements</b>                                         |                                                                                                      |                |                |                |          |
| caffeine                                                                                    |                                                                                                      | inhibitor      |                |                |          |
|                                                                                             | <i>Hospital pharmacists advice: This interaction is not clinically relevant, no action is needed</i> |                |                |                |          |
| cannabis oil                                                                                |                                                                                                      |                |                | inhibitor (10) |          |
| citrus fruits (other than grapefruit: sour orange/bitter orange, pomelo, sweetie/oroblanco) |                                                                                                      | inhibitor      |                |                | 7 days   |
| echinacea                                                                                   |                                                                                                      | inducer (11)   |                |                | 14 days  |
| evening primrose oil                                                                        |                                                                                                      | inducer (12)   | inhibitor (12) |                | 14 days  |
| ginkgo biloba                                                                               |                                                                                                      | inducer (12)   |                |                | 14 days  |
| ginseng                                                                                     | not conclusive(11, 13)                                                                               |                |                |                | 14 days  |
| golden seal (yellow root, Hydrastis Canadensis)                                             |                                                                                                      | inhibitor (14) | inhibitor (14) |                |          |
| grape fruit (or juice)                                                                      |                                                                                                      | inhibitor      |                |                | 7 days   |
| grape seed                                                                                  |                                                                                                      | inhibitor (13) |                |                | 14 days  |
| kava (piper methysticum)                                                                    | not conclusive (13)                                                                                  |                |                |                | 14 days  |
| St. John's Wort (hypericum)                                                                 |                                                                                                      | inducer**      |                | inducer**      | 14 days  |
| tumeric (curcuma longa)                                                                     |                                                                                                      | inhibitor (15) |                | inhibitor (16) |          |
| valerian                                                                                    | not conclusive (14)                                                                                  |                |                |                | 14 days  |
|                                                                                             |                                                                                                      |                |                |                |          |
| <b>Other</b>                                                                                |                                                                                                      |                |                |                |          |
| acetazolamide (Diamox)                                                                      |                                                                                                      | inhibitor      |                |                |          |
| aminoglutethimide                                                                           |                                                                                                      | inducer        |                |                |          |

<sup>11</sup> Pre-specified exceptions are described below

\* Mentioned as powerful inhibitor/inducer in the KNMP Kennisbank.

Note: Relevance of an interaction also depends on properties of the substrate, such as therapeutic width, biological availability or another route of metabolism.

[https://kennisbank.knmp.nl/article/Informatorium\\_Medicamentorum/G1126.html](https://kennisbank.knmp.nl/article/Informatorium_Medicamentorum/G1126.html)

\*\* Mentioned as inhibitor/inducer in the KNMP Kennisbank

[https://kennisbank.knmp.nl/article/Informatorium\\_Medicamentorum/G1126.html](https://kennisbank.knmp.nl/article/Informatorium_Medicamentorum/G1126.html)

\*\*\* Prohibited medication in the Phase I trial at Duke (IND#74,188)

**Table S3.1 Concomitant medications and products with possible interactions (continued)**

|                                                                    | Increased risk of toxicity                                                                                    | CYP3A4    | CYP2D6      | P-gp      | Wash-out |
|--------------------------------------------------------------------|---------------------------------------------------------------------------------------------------------------|-----------|-------------|-----------|----------|
| bromocriptine                                                      |                                                                                                               | inhibitor |             |           |          |
| bosentan                                                           |                                                                                                               | inducer** |             |           |          |
| chlorzoxazone                                                      |                                                                                                               | inhibitor |             |           |          |
| cinacalcet                                                         |                                                                                                               |           | inhibitor   |           |          |
| conivaptan                                                         |                                                                                                               | inhibitor |             |           |          |
| coumarins (vitamin K antagonists)                                  | Possible fluctuation of coagulation times. Increased susceptibility to bleeding when thrombocytopenia occurs. |           |             |           |          |
|                                                                    | <i>Hospital pharmacist's advice: Change to another anticoagulant is advised (e.g. LMWH)</i>                   |           |             |           |          |
| disulfiram                                                         |                                                                                                               | inhibitor |             |           |          |
| entacapone                                                         |                                                                                                               | inhibitor |             |           |          |
| glibenclamide/glyburide                                            |                                                                                                               | inhibitor |             |           |          |
| hydralazine                                                        |                                                                                                               | inhibitor |             |           |          |
| live virus vaccines                                                | miscellaneous <sup>12</sup>                                                                                   |           |             |           |          |
| methadone                                                          |                                                                                                               | inhibitor |             |           |          |
| mirabegron                                                         |                                                                                                               |           | inhibitor** |           |          |
| modafinil                                                          |                                                                                                               | inducer   |             |           |          |
| orphendrine                                                        |                                                                                                               | inhibitor |             |           |          |
| oxybutynin                                                         |                                                                                                               | inhibitor |             |           |          |
| pergolide                                                          |                                                                                                               | inhibitor |             |           |          |
| pilocarpine                                                        |                                                                                                               | inhibitor |             |           |          |
| ranolazine                                                         |                                                                                                               | inhibitor |             | inhibitor |          |
| sildenafil                                                         |                                                                                                               | inhibitor |             |           |          |
| ticlopidine                                                        |                                                                                                               | inhibitor |             |           |          |
| zalfirlukast                                                       |                                                                                                               | inhibitor |             |           |          |
| <b>Caution with (not strictly prohibited, consider monitoring)</b> |                                                                                                               |           |             |           |          |
| digoxin                                                            | Doxorubicin can lower its serum concentration                                                                 |           |             |           |          |
| uric acid lowering agents                                          | Doxorubicin can increase serum uric acid concentration (such as sulfinpyrazone*** and probenecid***)          |           |             |           |          |
| sorafenib                                                          | It might increase the doxorubicin dose                                                                        |           |             |           |          |
| dexrazoxane <sup>13</sup>                                          | It might result in lower response rates to doxorubicin                                                        |           |             |           |          |

<sup>12</sup> Administration of live or live-attenuated vaccines in patients immunocompromised by chemotherapeutic agents including doxorubicin, may result in serious or fatal infections. Vaccination with a live vaccine should be avoided in patients receiving doxorubicin. Killed or inactivated vaccines may be administered; however, the response to such vaccines may be diminished. Source: Pfizer 2010

<sup>13</sup> In a clinical study of women with metastatic breast cancer, the concurrent use of the cardioprotectant, dexrazoxane, with the initiation of a regimen of fluorouracil, doxorubicin, and cyclophosphamide (FAC) was associated with a lower tumor response rate. Source: Pfizer 2010.

\* Mentioned as powerful inhibitor/inducer in the KNMP Kennisbank.

Note: Relevance of an interaction also depends on properties of the substrate, such as therapeutic width, biological availability or another route of metabolism.

[https://kennisbank.knmp.nl/article/Informatorium\\_Medicamentorum/G1126.html](https://kennisbank.knmp.nl/article/Informatorium_Medicamentorum/G1126.html)

\*\* Mentioned as inhibitor/inducer in the KNMP Kennisbank

[https://kennisbank.knmp.nl/article/Informatorium\\_Medicamentorum/G1126.html](https://kennisbank.knmp.nl/article/Informatorium_Medicamentorum/G1126.html)

\*\*\* Prohibited medication in the Phase I trial at Duke (IND#74,188)

### **S3.2 Pre-specified exceptions (possible interactions accepted)**

#### **1. Cyclophosphamide**

“The addition of cyclophosphamide to doxorubicin treatment does not affect exposure to doxorubicin, but may result in an increase in exposure to doxorubicinol, a metabolite. Doxorubicinol only has 5% of the cytotoxic activity of doxorubicin. Concurrent treatment with doxorubicin has been reported to exacerbate cyclophosphamide-induced hemorrhagic cystitis.”(2) Concurrent cyclophosphamide treatment sensitizes the heart to the cardiotoxic effects of doxorubicin(17). However, since the AC regimen is frequently studied and used in daily practice, we anticipate a similar incidence of adverse events due to this interaction.

#### **6. Glucocorticoids (dexamethasone)**

Dexamethasone in the doses administered as premedication in this study induces CYP3A4 (7, 18), which could lower the doxorubicin concentration. However in the previous phase I and II dose finding studies (19), similar dosages of dexamethasone were administered (24 hours prior to treatment “dexamethasone 8 to 10 mg or an equivalent dose of a similar steroid consistent with local practice, every 12 hours x 3 doses” and 30 minutes prior to administration “IV Dexamethasone 20 mg”), therefore this interaction is accounted for in the maximum tolerable dose.

We will to administer dexamethasone in the premedication regimen as specified in the protocol, according to our local practice for the prevention of allergic reactions. Additional dosages of glucocorticoids (above the specified dosages) are prohibited.

#### **9. Propofol**

A dosage-dependent inhibitory effect of propofol on cytochrome P450 3A4 has been described(20), indicating that a minimum clinical dosage could induce a significant inhibition of CYP 3A4 activity.

There is only one in vivo study were propofol decreased the clearance of midazolam, possibly via competitive inhibition of hepatic CYP3A4(21). Since no adverse events due to administration of propofol in combination with CYP3A4 substrates have been reported, we anticipate no severe interaction and administrate propofol as specified in the protocol.

#### **10. Aprepitant**

As described by Dushenkov et al. “coadministration of aprepitant with antineoplastics may result in SS pharmacokinetic alterations in serum levels of cytotoxics, with the best documentation for cyclophosphamide, ifosfamide and erlotinib. (...) To date, there are no data convincingly linking adverse outcomes due to coadministration of aprepitant and antineoplastics”(22).

Since the use of aprepitant as antiemetic in the dosages specified in the protocol is part of our hospital’s standard practice for the AC chemotherapy regimen, and there is no convincing evidence against it, we will administer aprepitant as specified in the protocol. Additional dosages of aprepitant will be prohibited.

#### **11. Clemastine**

Clemastine may inhibit CYP3A4 activity and therefore alter doxorubicin metabolism. However clemastine is an essential part of the premedication regimen in our hospital for the prevention of allergic reactions. Since there are no reports in literature of clinically significant interactions with clemastine, and H1- antihistamine agents were also used in the dose finding study(19), we anticipate no severe interactions in our study and will administer clemastine as specified in the protocol.

**References:**

1. Celsion Corporation. ThermoDox<sup>®</sup>, Lyso-Thermosensitive Liposomal Doxorubicin (LTLD), Investigator's Brochure. 2016.
2. Pfizer. Doxorubicin hydrochloride for injection, USP. USP. 2010; Available at: [http://www.accessdata.fda.gov/drugsatfda\\_docs/label/2010/050467s070lbl.pdf](http://www.accessdata.fda.gov/drugsatfda_docs/label/2010/050467s070lbl.pdf).
3. Zorginstituut Nederland. Farmacokinetiek. Farmacotherapeutisch Kompas. Brought up to date on December 1st 2016; Available at: <https://www.farmacotherapeutischkompas.nl/bladeren-volgens-boek/inleidingen/inl-farmacokinetiek>.
4. Lynch T, Price A. The Effect of Cytochrome P450 Metabolism on Drug Response, Interactions, and Adverse Effects. *American Family Physician*. 2007;76(3):391-6.
5. Haddad A, Davis M, Lagman R. The pharmacological importance of cytochrome CYP3A4 in the palliation of symptoms: review and recommendations for avoiding adverse drug interactions. *Support Care Cancer*. 2007;15(3):251-7.
6. KNMP Kennisbank. Informatorium Medicamentorum. Version 2.3.1.5 (2016); available at: [https://kennisbank.knmp.nl/article/informatorium\\_Medicamentorum/intro.html](https://kennisbank.knmp.nl/article/informatorium_Medicamentorum/intro.html).
7. McCune JS, Hawke RL, LeCluyse EL, Gillenwater HH, Hamilton G, Ritchie J, et al. In vivo and in vitro induction of human cytochrome P4503A4 by dexamethasone. *Clin Pharmacol Ther*. 2000;68(4):356-66.
8. Villikka K, Kivisto KT, Neuvonen PJ. The effect of dexamethasone on the pharmacokinetics of triazolam. *Pharmacol Toxicol*. 1998;83(3):135-8.
9. Villikka K, Varis T, Backman JT, Neuvonen PJ, Kivisto KT. Effect of methylprednisolone on CYP3A4-mediated drug metabolism in vivo. *Eur J Clin Pharmacol*. 2001;57(6-7):457-60.
10. Zhu HJ, Wang JS, Markowitz JS, Donovan JL, Gibson BB, Gefroh HA, et al. Characterization of P-glycoprotein inhibition by major cannabinoids from marijuana. *J Pharmacol Exp Ther*. 2006;317(2):850-7.
11. Hermann R, von Richter O. Clinical evidence of herbal drugs as perpetrators of pharmacokinetic drug interactions. *Planta Med*. 2012;78(13):1458-77.
12. Jalloh MA, Gregory PJ, Hein D, Risoldi Cochrane Z, Rodriguez A. Dietary supplement interactions with antiretrovirals: a systematic review. *Int J STD AIDS*. 2016.
13. Wanwimolruk S, Phopin K, Prachayasittikul V. Review article: cytochrome p450 enzyme mediated herbal drug interactions (part 2). *EXCLI Journal*. 2014;13:869-96.
14. Gurley BJ, Gardner SF, Hubbard MA, Williams DK, Gentry WB, Khan IA, et al. In vivo effects of goldenseal, kava kava, black cohosh, and valerian on human cytochrome P450 1A2, 2D6, 2E1, and 3A4 phenotypes. *Clin Pharmacol Ther*. 2005;77(5):415-26.
15. Shamsi S, Tran H, Tan RS, Tan ZJ, Lim LY. Curcumin, Piperine, and Capsaicin: A Comparative Study of Spice-Mediated Inhibition of Human Cytochrome P450 Isozyme Activities. *Drug Metab Dispos*. 2017;45(1):49-55.
16. Lopes-Rodrigues V, Sousa E, Vasconcelos MH. Curcumin as a Modulator of P-Glycoprotein in Cancer: Challenges and Perspectives. *Pharmaceuticals (Basel)*. 2016;9(4).
17. Pfizer. Product information Adriamycin<sup>®</sup> Solution for Injection available at: [http://www.pfizer.com/au/sites/g/files/g10005016/f/201311/PI\\_Adriamycin\\_212.pdf](http://www.pfizer.com/au/sites/g/files/g10005016/f/201311/PI_Adriamycin_212.pdf). Version pfpadrii10612 (2012).
18. Czock D, Keller F, Rasche FM, Häussler U. Pharmacokinetics and Pharmacodynamics of Systemically Administered Glucocorticoids. *Clin Pharmacokinet*. 2005;44(1):61-98.
19. Zagar TM, Vujaskovic Z, Formenti S, Rugo H, Muggia F, O'Connor B, et al. Two phase I dose-escalation/pharmacokinetics studies of low temperature liposomal doxorubicin (LTLD) and mild local hyperthermia in heavily pretreated patients with local regionally recurrent breast cancer. *Int J Hyperthermia*. 2014;30(5):285-94.
20. Yang L-Q, Yu W-F, Cao Y-F, Gong B, Chang Q, Yang G-S. Potential inhibition of cytochrome P450 3A4 by propofol in human primary hepatocytes. *World J Gastroenterol*. 2003;9(9):1959-62.
21. Hamaoka N, Oda Y, Hase I, Mizutani K, Nakamoto T, Ishizaki T, et al. Propofol decreases the clearance of midazolam by inhibiting CYP3A4: an in vivo and in vitro study. *Clin Pharmacol Ther*. 1999;66:110-7.
22. Dushenkov A, Kalabalik J, Carbone A, Jungsuwadee P. Drug interactions with aprepitant or fosaprepitant: Review of literature and implications for clinical practice. *J Oncol Pharm Pract*. 2016.

### Supplement 4 Flow-chart interim analysis

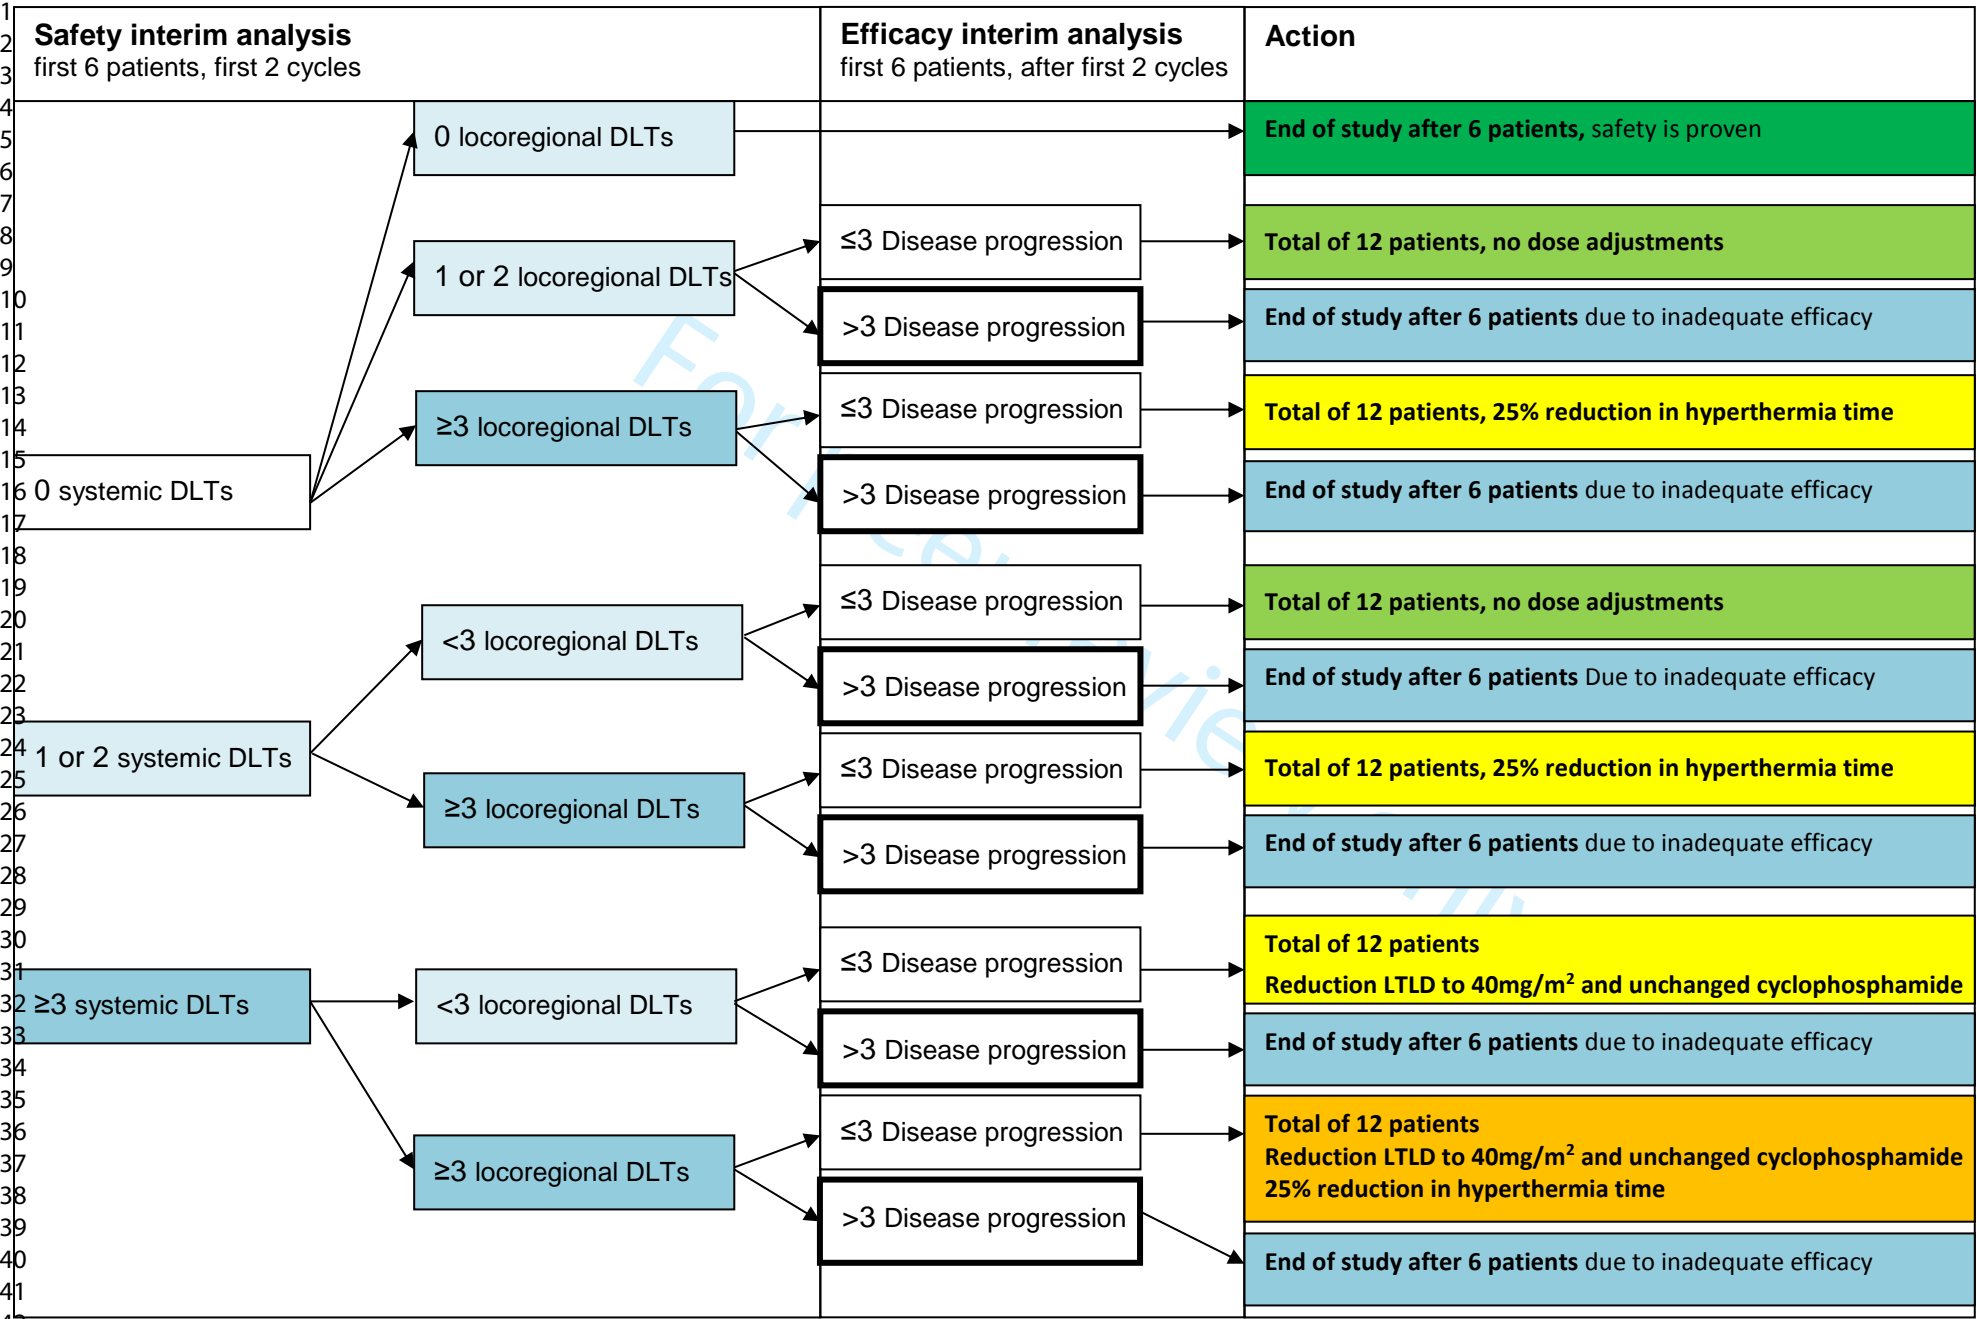

**Supplement 5 Data Safety Monitoring Board Charter**

**DMC (DSMB) charter for the i-GO study**

Version 3, 14-01-2019

| CONTENT                                                            |                                                                                                                                                                                                                                                                                                                                                                                                                                                                                                                                                                                                                                                                                                                                                                                                                                                                                                                                                                                                                                                                                                           |
|--------------------------------------------------------------------|-----------------------------------------------------------------------------------------------------------------------------------------------------------------------------------------------------------------------------------------------------------------------------------------------------------------------------------------------------------------------------------------------------------------------------------------------------------------------------------------------------------------------------------------------------------------------------------------------------------------------------------------------------------------------------------------------------------------------------------------------------------------------------------------------------------------------------------------------------------------------------------------------------------------------------------------------------------------------------------------------------------------------------------------------------------------------------------------------------------|
| <b>1. INTRODUCTION</b>                                             |                                                                                                                                                                                                                                                                                                                                                                                                                                                                                                                                                                                                                                                                                                                                                                                                                                                                                                                                                                                                                                                                                                           |
| Name (and sponsor's ID) of trial plus ISRCTN and/or EUDRACT number | <ul style="list-style-type: none"> <li><u>Trial name:</u><br/>Image-guided targeted doxorubicin delivery with hyperthermia to optimize loco-regional control in breast cancer; the i-GO feasibility study.<br/><br/>Phase I Feasibility Study of High-Intensity Focused Ultrasound-Induced Hyperthermia (HIFU), Lyso-Thermosensitive Liposomal Doxorubicin (LTLD), and Cyclophosphamide for Metastatic Breast Cancer</li> <li><u>Trial sponsor:</u> Imaging division and Cancer Center, University Medical Center (UMC) UTRECHT</li> <li><u>Type of trial:</u> Investigational drug trial and investigational medical device trial</li> <li><u>Number of patients to be included:</u> 6-12</li> <li><u>Number of sites:</u> single center (UMC Utrecht)</li> <li><u>Estimated trial duration:</u> 3 years</li> <li><u>EUDRACT number:</u> 2015-005582-23</li> <li><u>METC protocol number:</u> NL67422.041.18</li> <li><u>ClinicalTrials.gov Identifier:</u> to be determined</li> <li><u>Principal investigator:</u> B.B.M. Suelmann</li> <li><u>Coordinating investigator:</u> J. S. de Maar</li> </ul> |
| Objectives of trial, including interventions being investigated    | <p><u>Primary objective:</u> To determine safety, tolerability and feasibility of the administration of LTLD + HIFU inducing local hyperthermia, combined with cyclophosphamide in metastatic breast cancer patients.</p> <p><u>Secondary objective:</u> Efficacy; to assess pathologic and clinically objective response from study treatment</p> <p>A flow chart of the trial design is included (Figure 1).</p>                                                                                                                                                                                                                                                                                                                                                                                                                                                                                                                                                                                                                                                                                        |
| Outline of scope of charter                                        | <p><i>The purpose of this document is to describe the roles and responsibilities of the independent DMC for the i-GO trial, including the timing of meetings, methods of providing information to and from the DMC, frequency and format of meetings, statistical issues and relationships with other committees.</i></p>                                                                                                                                                                                                                                                                                                                                                                                                                                                                                                                                                                                                                                                                                                                                                                                 |
| <b>2. ROLES AND RESPONSIBILITIES</b>                               |                                                                                                                                                                                                                                                                                                                                                                                                                                                                                                                                                                                                                                                                                                                                                                                                                                                                                                                                                                                                                                                                                                           |
| A broad statement of the aims of the committee                     | <p><i>"To safeguard the interests of trial participants, assess the safety and efficacy of the interventions during the trial, and monitor the overall conduct of the clinical trial."</i></p>                                                                                                                                                                                                                                                                                                                                                                                                                                                                                                                                                                                                                                                                                                                                                                                                                                                                                                            |
| Terms of reference                                                 | <p><i>The DMC should receive and review the progress and accruing data of this trial and provide advice on the conduct of the trial to the Principal Investigator. The DMC should inform the Principal Investigator and Head of Department of Medical Oncology if, in their view:</i></p> <p><i>the results are likely to convince a broad range of clinicians, including those supporting the trial and the general clinical community, that the study treatment is clearly contraindicated or unsafe, and there was a reasonable expectation that this new evidence would materially influence patient management.</i></p>                                                                                                                                                                                                                                                                                                                                                                                                                                                                              |

|                                                                |                                                                                                                                                                                                                                                                                                                                                                                                                                                                                                                                                                                                                                                                                                                                                                                                                                                                                                                                                                                                                                                                                                                                                                                                                                                                  |
|----------------------------------------------------------------|------------------------------------------------------------------------------------------------------------------------------------------------------------------------------------------------------------------------------------------------------------------------------------------------------------------------------------------------------------------------------------------------------------------------------------------------------------------------------------------------------------------------------------------------------------------------------------------------------------------------------------------------------------------------------------------------------------------------------------------------------------------------------------------------------------------------------------------------------------------------------------------------------------------------------------------------------------------------------------------------------------------------------------------------------------------------------------------------------------------------------------------------------------------------------------------------------------------------------------------------------------------|
| <p>Specific roles of DMC</p>                                   | <p>Interim review of the trial's progress including updated figures on recruitment, data quality, and main outcomes and safety data.</p> <p>A selection of specific aspects could be compiled from the following list:</p> <ul style="list-style-type: none"> <li>• assess data quality, including completeness (and by so doing encourage collection of high quality data)</li> <li>• monitor recruitment figures and losses to follow-up</li> <li>• monitor evidence for treatment harm (eg toxicity data, SAEs, deaths)</li> <li>• Monitor the interim safety and efficacy analysis as specified in the study protocol in section 10.4</li> <li>• decide whether to recommend that the trial continues to recruit participants or whether recruitment should be terminated either for everyone or for some participant subgroups</li> <li>• suggest additional data analyses</li> <li>• advise on protocol modifications suggested by investigators or sponsors (eg to inclusion criteria, trial endpoints, or sample size)</li> <li>• monitor compliance with previous DMC recommendations</li> <li>• considering the ethical implications of any recommendations made by the DMC</li> <li>• assess the impact and relevance of external evidence</li> </ul> |
| <p><b>3. BEFORE OR EARLY IN THE TRIAL</b></p>                  |                                                                                                                                                                                                                                                                                                                                                                                                                                                                                                                                                                                                                                                                                                                                                                                                                                                                                                                                                                                                                                                                                                                                                                                                                                                                  |
| <p>Whether the DMC will have input into the protocol</p>       | <p>All potential DMC members should have sight of the protocol/outline before agreeing to join the committee. Before recruitment begins the trial will have undergone review a research ethics committee. Therefore, if a potential DMC member has major reservations about the trial (eg the protocol or the logistics) they should report these to the PI and may decide not to accept the invitation to join. DMC members should be independent and constructively critical of the ongoing trial, but also supportive of aims and methods of the trial.</p>                                                                                                                                                                                                                                                                                                                                                                                                                                                                                                                                                                                                                                                                                                   |
| <p>Whether the DMC will meet before the start of the trial</p> | <p>It is recommended that, if possible, the DMC meets before the trial starts or early in the course of the trial, to discuss the protocol, the trial, any analysis plan, future meetings, and to have the opportunity to clarify any aspects with the principal investigators. The DMC should meet within one year of recruitment commencing.</p>                                                                                                                                                                                                                                                                                                                                                                                                                                                                                                                                                                                                                                                                                                                                                                                                                                                                                                               |
| <p>Any issues specific to the disease under study</p>          | <p>Issues specific to the disease under study:</p> <ul style="list-style-type: none"> <li>• The population consists of patients with metastatic breast cancer (stage IV disease), who have not received previous chemotherapy or surgery (previous antihormonal therapy is permitted)</li> <li>• It concerns a non-curable disease. Median survival is approximately 2 years, however there is a great heterogeneity in survival, ranging from a few months to many years, with 10-15 % of patients surviving ten years and more.</li> <li>• Most patients included in this trial will have the possibility to receive more treatment lines after this trial.</li> <li>• Goal of the treatment in this stage of disease is to maintain or improve the quality of life and to improve survival.</li> <li>• The natural course of the disease and the comorbidity are not always easy to distinguish from toxicity caused by the experimental treatment</li> </ul>                                                                                                                                                                                                                                                                                                 |

|                                                                                                 |                                                                                                                                                                                                                                                                                                                                                                                                                                                                                                                                                                                                                                                                                                                                                                                                                                                                                                                                                                                                                       |
|-------------------------------------------------------------------------------------------------|-----------------------------------------------------------------------------------------------------------------------------------------------------------------------------------------------------------------------------------------------------------------------------------------------------------------------------------------------------------------------------------------------------------------------------------------------------------------------------------------------------------------------------------------------------------------------------------------------------------------------------------------------------------------------------------------------------------------------------------------------------------------------------------------------------------------------------------------------------------------------------------------------------------------------------------------------------------------------------------------------------------------------|
| Any specific regulatory issues                                                                  | The DMC should be aware of any regulatory implications of their recommendations.                                                                                                                                                                                                                                                                                                                                                                                                                                                                                                                                                                                                                                                                                                                                                                                                                                                                                                                                      |
| Any other issues specific to the treatment under study                                          | <ul style="list-style-type: none"> <li>• The investigational drug (ThermoDox) and the co-intervention cyclophosphamide are chemotherapeutics</li> <li>• As with the majority of chemotherapy regimens, toxicities can be expected including bone-marrow toxicity, nausea, fatigue, stomatitis, alopecia, constipation, and musculoskeletal chest pain. These adverse events are expected in standard treatment as well.</li> <li>• All chemotherapy agents are potentially teratogenic and mutagenic.</li> <li>• Specific regulations apply for the administration and handling of chemotherapy (UMC Utrecht protocols will be followed)</li> <li>• The study treatment consists of an investigational drug as well as an investigational device.</li> </ul>                                                                                                                                                                                                                                                          |
| Whether members of the DMC will have a contract                                                 | <ul style="list-style-type: none"> <li>• Membership of the DMC (in agreement with the contents of this charter) will be accepted by the individual members and confirmed in writing and after submission of a signed and dated curriculum vitae (CV). The signed CV will be kept in the study file at the clinical trial bureau Medical Oncology.</li> <li>• DMC members will sign a non-conflict of interest statement (Annex 1) in regard to this study which will be in the study file at the clinical trial bureau Medical Oncology.</li> </ul>                                                                                                                                                                                                                                                                                                                                                                                                                                                                   |
| <b>4. COMPOSITION</b>                                                                           |                                                                                                                                                                                                                                                                                                                                                                                                                                                                                                                                                                                                                                                                                                                                                                                                                                                                                                                                                                                                                       |
| Membership and size of the DMC                                                                  | <p>The members will be independent of the trial (eg will not be involved with the trial in any other way or have some competing interest that could impact on the trial). Any competing interests, both real and potential, will be declared.</p> <p>The members of the DMC for this trial are:</p> <ol style="list-style-type: none"> <li>(1) <i>Hanneke van Laarhoven</i><br/><i>Medical oncologist at the Academic Medical Center (AMC) Amsterdam</i><br/><i>Clinician, experienced in the field of (medical) oncology and experienced in performing clinical trials</i></li> <li>(2) <i>Harm van Tinteren</i><br/><i>Head of scientific administration/biometrics department at the Antoni van Leeuwenhoek (AVL) hospital. Biostatistical reviewer.</i></li> <li>(3) <i>Geertjan van Tienhoven</i><br/><i>Radiation oncologist at the Academic Medical Center (AMC) Amsterdam</i><br/><i>Clinician, experienced in the field of (radiation) oncology and experienced in performing clinical trials</i></li> </ol> |
| The Chair, how they are chosen and the Chair's role. (Likewise, if relevant, the vice-Chairman) | <p>Hanneke van Laarhoven will be the chair of the DMC.</p> <p>The Chair has previous experience of serving on DMCs and experience of chairing meetings, and is able to facilitate and summarize discussions. The Chair was chosen by the investigators.</p>                                                                                                                                                                                                                                                                                                                                                                                                                                                                                                                                                                                                                                                                                                                                                           |
| The responsibilities of the DMC statistician                                                    | The DMC membership will include a statistician to provide independent statistical expertise.                                                                                                                                                                                                                                                                                                                                                                                                                                                                                                                                                                                                                                                                                                                                                                                                                                                                                                                          |
| The responsibilities of the trial statistician                                                  | <p>The project team will not have a trial statistician, this is not considered necessary based on the trial design.</p> <p><i>The coordinating investigator will produce the report to the DMC.</i></p>                                                                                                                                                                                                                                                                                                                                                                                                                                                                                                                                                                                                                                                                                                                                                                                                               |
| The responsibilities of the PI                                                                  | The PI, may be asked, and should be available, to attend open sessions of the DMC meeting.                                                                                                                                                                                                                                                                                                                                                                                                                                                                                                                                                                                                                                                                                                                                                                                                                                                                                                                            |



## 5. RELATIONSHIPS

Clarification of whether the DMC are advisory (make recommendations) or executive (make decisions)

The DMC makes recommendations to the investigators.

Payments to DMC members

Members will be reimbursed for travel expenses and for the costs of teleconferencing (if applicable).

The need for DMC members to disclose information about any competing interests

Competing interests should be disclosed. These are not restricted to financial matters – involvement in other trials or intellectual investment could be relevant. Although members may well be able to act objectively despite such connections, complete disclosure enhances credibility. (See Annex 1)

DMC members should not use interim results to inform trading in pharmaceutical shares, and careful consideration should be given to trading in stock of companies with competing products.

## 6. ORGANISATION OF DMC MEETINGS

Expected frequency of DMC meetings

The DMC will meet approximately five times, during the trial. The exact frequency of meetings will depend upon trial events. The DMC will meet at least yearly.

Whether meetings will be face-to-face or by teleconference

The first meeting should ideally be face-to-face to facilitate full discussion and allow members to get to know each other. It is recommended that all subsequent meetings should be face-to-face if possible, with teleconference as a second option.

How DMC meetings will be organised, especially regarding open and closed sessions, including who will be present in each session

The format of the meetings will be:

1. Open session: **Introductory meeting**

Before start of the trial.

2. Closed session: **first data evaluation**

Once the first three patients completed two treatment cycles (if necessary extra open session for clarification of specific concerns)

3. Closed session: **safety and efficacy interim analysis**

Once the first six patients completed two treatment cycles. (if necessary extra open session for clarification of specific concerns)

4. (If applicable) Closed session: **further safety and efficacy analysis**

Once the first twelve patients completed two treatment cycles. (if necessary extra open session for clarification of specific concerns)

5. Closed session: **follow up data evaluation, final evaluation**

The closed session will be restricted to the DMC members. The minutes of the closed session will be recorded by one of the members of the DMC. Minutes from the closed session will be recorded separately from the minutes of the open session and stored securely by the Chair. Closed session minutes, finalized by signature of the Chair, will be maintained in confidence and retained until discarded in accordance with applicable statutory regulation.

The open session will be attended by representatives of the study investigators (in general the coordinating investigator). Data presented in the open session may include enrolment data, individual AE data, baseline characteristics, overall data accuracy and compliance data or issues, and other administrative data. Minutes of the open session will be recorded by one of the members of the DMC. Minutes will be finalized upon signature of the Chair and maintained in the study file at the clinical trial bureau Medical Oncology in accordance with applicable statutory regulation.

|                                                                                                                                      |                                                                                                                                                                                                                                                                                                                                                                                                                      |
|--------------------------------------------------------------------------------------------------------------------------------------|----------------------------------------------------------------------------------------------------------------------------------------------------------------------------------------------------------------------------------------------------------------------------------------------------------------------------------------------------------------------------------------------------------------------|
| <b>7. TRIAL DOCUMENTATION AND PROCEDURES<br/>TO ENSURE CONFIDENTIALITY AND<br/>PROPER COMMUNICATION</b>                              |                                                                                                                                                                                                                                                                                                                                                                                                                      |
| Intended content of material to be available in open sessions                                                                        | <i>Open sessions: Accumulating information relating to recruitment and data quality (eg data return rates, treatment compliance) will be presented. Toxicity details based on pooled data will be presented and total numbers of events for the primary outcome measure (safety, tolerability and feasibility) and other outcome measures may be presented, at the discretion of the DMC.</i>                        |
| Intended content of material to be available in closed sessions                                                                      | <i>The same material will be available in the closed and open sessions.</i>                                                                                                                                                                                                                                                                                                                                          |
| Will the DMC be blinded to the treatment allocation                                                                                  | Not applicable.                                                                                                                                                                                                                                                                                                                                                                                                      |
| Who will see the accumulating data and interim analysis                                                                              | The DMC members perform the interim analysis (safety and efficacy), based on the data provided by the coordinating investigator, and report their recommendations to the principal investigator.                                                                                                                                                                                                                     |
| Who will be responsible for identifying and circulating external evidence (eg from other trials/ systematic reviews)                 | DMC members do <b>not</b> have the right to share confidential information with anyone outside the DMC, including the PI.<br>Identification and circulation of external evidence (eg from other trials/ systematic reviews) is not the responsibility of the DMC members. The PI or the trials office team will collate any such information.                                                                        |
| To whom the DMC will communicate the decisions/ recommendations that are reached                                                     | The DMC will report its recommendations in writing to the PI.                                                                                                                                                                                                                                                                                                                                                        |
| Whether reports to the DMC be available before the meeting or only at/during the meeting                                             | The DMC will receive the report from the coordinating investigator at least 2 weeks before any meetings.                                                                                                                                                                                                                                                                                                             |
| What will happen to the confidential papers after the meeting                                                                        | <i>The DMC members should destroy their reports after each meetings. Fresh copies of previous reports will be circulated with the newest report before each meeting.</i>                                                                                                                                                                                                                                             |
| <b>8. DECISION MAKING</b>                                                                                                            |                                                                                                                                                                                                                                                                                                                                                                                                                      |
| What decisions/recommendations will be open to the DMC                                                                               | Possible recommendations could include: <ul style="list-style-type: none"> <li>• No action needed, trial continues as planned</li> <li>• Early stopping due, for example, to clear harm of a treatment, futility, or external evidence</li> <li>• Stopping recruitment within a subgroup</li> <li>• Extending recruitment or extending follow-up</li> <li>• Sanctioning and/or proposing protocol changes</li> </ul> |
| The role of formal statistical methods, specifically which methods will be used and whether they will be used as guidelines or rules | The planned statistical analyses are described in chapter 10 of the study protocol.<br>Specifically, an interim safety evaluation and an interim efficacy evaluation will be performed (section 10.4 of the study protocol) :<br><u>In summary, at the interim evaluations:</u>                                                                                                                                      |

|                                                                                                                                                       |                                                                                                                                                                                                                                                                                                                                                                                                                                                                                                                                                                                                                                                                                               |
|-------------------------------------------------------------------------------------------------------------------------------------------------------|-----------------------------------------------------------------------------------------------------------------------------------------------------------------------------------------------------------------------------------------------------------------------------------------------------------------------------------------------------------------------------------------------------------------------------------------------------------------------------------------------------------------------------------------------------------------------------------------------------------------------------------------------------------------------------------------------|
|                                                                                                                                                       | <p>The trial will continue to accrue until a total of 12 subjects have been treated if both the following occur:</p> <ul style="list-style-type: none"> <li>• a maximum of three of the first six subjects show disease progression after cycle 2; <b>AND:</b></li> <li>• either one or two systemic DLTs (dose limiting toxicities) were seen among the first two cycles of the first six subjects <b>OR</b></li> <li>•(if no systemic DLTs were seen) any locoregional DLT was seen among the first two cycles of the first six subjects</li> </ul> <p>Specific criteria for dose adjustments for the entire study population are also specified in section 10.4 of the study protocol.</p> |
| <p>How decisions or recommendations will be reached within the DMC</p>                                                                                | <p>Every effort should be made for the DMC to reach an unanimous decision. However, if this is not possible, the majority vote will decide.</p> <p>It is important that the implications (eg ethical, statistical, practical, financial) for the trial be considered before any recommendation is made.</p> <p>The Chair will summarise discussions and encourage consensus; it may be best for the Chair to give their own opinion last.</p>                                                                                                                                                                                                                                                 |
| <p>When the DMC is quorate for decision-making</p>                                                                                                    | <p><i>Effort should be made for all members to attend. The coordinating investigator will try to ensure that a date is chosen to enable this. Members who cannot attend in person should be encouraged to attend by teleconference. If, at short notice, any DMC members cannot attend at all then the DMC may still meet if at least one statistician and one clinician, including the Chair will be present. If the DMC is considering recommending major action after such a meeting the DMC Chair should talk with the absent members as soon after the meeting as possible to check they agree. If they do not, a further teleconference should be arranged with the full DMC.</i></p>   |
| <p>Can DMC members who cannot attend the meeting input</p>                                                                                            | <p>If the report is circulated before the meeting, DMC members who will not be able to attend the meeting may pass comments to the DMC Chair for consideration during the discussions.</p>                                                                                                                                                                                                                                                                                                                                                                                                                                                                                                    |
| <p>What happens to members who do not attend meetings</p>                                                                                             | <p><i>If a member does not attend a meeting, it should be ensured that the member is available for the next meeting. If a member does not attend a second meeting, they should be asked if they wish to remain part of the DMC. If a member does not attend a third meeting, they should be replaced.</i></p>                                                                                                                                                                                                                                                                                                                                                                                 |
| <p>Whether different weight will be given to different endpoints (eg safety/efficacy)</p>                                                             | <p>Safety and efficacy interim analyses are equally important and both determine whether the trial will be continued, as specified in section 10.4 of the study protocol.</p>                                                                                                                                                                                                                                                                                                                                                                                                                                                                                                                 |
| <p>Any specific issues relating to the trial design that might influence the proceedings, eg cluster trials, equivalence trials, multi-arm trials</p> | <p>The safety interim analysis and efficacy interim analysis will both be performed once the first six patients completed two treatment cycles.</p> <p>It is possible (and expected) that when the sixth patient completes her second treatment cycle, the first patient will already have completed all treatment cycles.</p>                                                                                                                                                                                                                                                                                                                                                                |

**9. REPORTING**

To whom will the DMC report their recommendations/decisions, and in what form

The DMC will report their recommendations/decisions in the form of a letter to the PI and coordinating investigator, within 2 weeks. A copy of the letter will be kept in the study file at the Clinical trial bureau Medical Oncology.

Whether minutes of the meeting be made and, if so, by whom and where they will be kept

As described in chapter 6 of this charter minutes of the meetings will be taken by one of the DMC members and will be kept at the clinical trial bureau.

What will be done if there is disagreement between the DMC and the body to which it reports

*"If the DMC has serious problems or concerns with the PI's decision a meeting should be held. The information to be shown would depend upon the action proposed and the DMC's concerns. Depending on the reason for the disagreement confidential data will often have to be revealed to all those attending such a meeting. The meeting should be chaired by a senior member of the trials office staff or an external expert who is not directly involved with the trial."*

**10. AFTER THE TRIAL**

Publication of results

At the end of the trial there may be a meeting to allow the DMC to discuss the final data with principal trial investigators and give advice about data interpretation.

The trial results will be published in a correct and timely manner.

The information about the DMC that will be included in published trial reports

DMC members should be named and their affiliations listed in the main report. A brief summary of the timings and conclusions of DMC meetings should be included in the body of this paper.

Any constraints on DMC members divulging information about their deliberations after the trial has been published

The DMC may discuss issues from their involvement in the trial when permission is agreed with the PI.

I hereby declare that I have read the charter and that I agree with its contents.

Name: \_\_\_\_\_

Signed: \_\_\_\_\_

Date: \_\_\_\_\_

## Supplement 6.1 Patient informed consent form in English

### The i-GO study: treatment of breast cancer using chemotherapy encapsulated in temperature sensitive nanoparticles, in combination with local warming of the tumour.

- I have read the information letter. I was able to ask questions. My questions have been sufficiently answered. I had sufficient time to decide whether or not I will participate.
- I know that participation is voluntary. I also know that at any moment, I can decide not to participate after all or to quit the study. I don't have to provide a reason for that.
- I give consent to inform my general practitioner, treating medical specialist(s) and pharmacy that I participate in this study.
- I give consent to request information (medical data, laboratory results and previously made scans) from my general practitioner and treating medical specialist(s) from other hospitals.
- I give consent to notify my general practitioner and/or treating medical specialist(s) about unexpected findings that are or could be of importance to my health.
- I know that I cannot become pregnant during the study.
- I consent to collect and use my data and blood samples in the way and for the causes that are described in the information letter.
- I know that, in order to monitor the study, certain persons will have access to all my data. These persons are stated in the information letter. I give consent for access by these persons.
- I give consent to keep my data at the UMC Utrecht for 15 years after this study.
- I  **do**  
 **do not**  
give consent to use my personal data for future research on the topic of breast cancer, during the 15 year that the data have to be kept.
- I  **do**  
 **do not**  
give consent to approach me after this study for a follow-up study or other research on the topic of breast cancer.
- I know that, in case I have side effects of the treatment, coded data on the side effects will be provided to Profound Medical and Celsion. These data cannot be traced back to me personally.
- I  **do**  
 **do not**  
give consent to provide coded data (other than side effects) to Profound Medical and Celsion. These data cannot be traced back to me personally.
- I want to participate in this study.

Name study subject:

Signature:

Date : \_\_ / \_\_ / \_\_

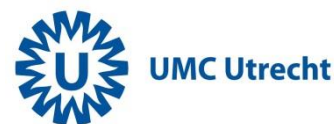

1 Patient informed consent form i-GO study  
2 NL67422.041.18 – version 5, 06-08-2020 page 2/3  
3  
4

5  
6 I declare that I have fully informed this subject on the mentioned study.

7 If, during the duration of the study, information will become available that could affect the subject's  
8 consent, then I will timely inform her about that.  
9

10  
11 Name investigator (or representative):  
12

13  
14 Signature:

Date: \_\_ / \_\_ / \_\_  
15  
16  
17  
18  
19  
20  
21  
22  
23  
24  
25  
26  
27  
28  
29  
30  
31  
32  
33  
34  
35  
36  
37  
38  
39  
40  
41  
42  
43  
44  
45  
46  
47  
48  
49  
50  
51  
52  
53  
54  
55  
56  
57  
58  
59  
60

For peer review only

## Supplement 6.2 Patient informed consent form for Biobank research in English

### Biobank research of the i-GO study

(This is a separate part of the i-GO study, for which you can give consent separately)

- I  **do**  
 **do not** give consent to draw **extra blood** which will be coded and kept indefinitely in the Central Biobank of the UMC Utrecht, for future research on the topic of breast cancer.
- I  **do**  
 **do not** give consent to use my body material that has been obtained during breast biopsies, breast surgery or biopsies of metastases (to confirm my diagnosis or after the end of this study), to use this body material for further research and to keep it, as is explained in the patient information letter.
- I  **do**  
 **do not** give consent to keep my data at the UMC Utrecht for longer than 15 years and to use it for future research on the topic of breast cancer.
- I know that I can withdraw my consent to the Biobank research at any moment. I don't have to provide a reason for that.

Name study subject:

Signature:

Date: \_\_ / \_\_ / \_\_

---

I declare that I have fully informed this subject on the mentioned study.

If, during the duration of the study, information will become available that could affect the subject's consent, then I will timely inform her about that.

Name investigator (or representative):

Signature:

Date: \_\_ / \_\_ / \_\_

**Reference to SPIRIT 2013 Checklist for:**

*Study protocol of the i-GO study, a phase I feasibility study of Magnetic Resonance guided High-Intensity Focused Ultrasound-induced hyperthermia, Lyso-Thermosensitive Liposomal Doxorubicin and cyclophosphamide in de novo stage IV breast cancer patients.*

| The SPIRIT 2013 Checklist contains recommended items to address in a clinical trial protocol and related documents.                  |          |                                                                                       |
|--------------------------------------------------------------------------------------------------------------------------------------|----------|---------------------------------------------------------------------------------------|
| The SPIRIT checklist is copyrighted by the SPIRIT Group under the Creative Commons "Attribution-NonCommercial-NoDerivs 3.0 Unported" |          |                                                                                       |
| Section/item                                                                                                                         | Item no. | Mentioned in study protocol on page                                                   |
| <b>Administrative information</b>                                                                                                    |          |                                                                                       |
| Title                                                                                                                                | 1        | Title page                                                                            |
| Trial registration                                                                                                                   | 2a       | Page 4, line12,<br>Page 26, line 16                                                   |
|                                                                                                                                      | 2b       | Complete study protocol                                                               |
| Protocol version                                                                                                                     | 3        | Page 24, line 6                                                                       |
| Funding                                                                                                                              | 4        | Page 27, lines 6-9                                                                    |
| Roles and responsibilities                                                                                                           | 5a       | Page 24, line 14 through<br>page 25 line 7<br>Page 26, lines 1-4                      |
|                                                                                                                                      | 5b       | Page 24, lines 14-15                                                                  |
|                                                                                                                                      | 5c       | Page 24, line 14 through<br>page 25 line 7                                            |
|                                                                                                                                      | 5d       | Page 24, line 14 through<br>page 25 line 7                                            |
| <b>Introduction</b>                                                                                                                  |          |                                                                                       |
| Background and rationale                                                                                                             | 6a       | Page 6-10                                                                             |
|                                                                                                                                      | 6b       | Not applicable                                                                        |
| Objectives                                                                                                                           | 7        | Page 7, lines 2-8<br>Page 10, lines 19-22<br>Page 14, line 16<br>Page 23, lines 11-13 |
| Trial design                                                                                                                         | 8        | Page 10, lines 19-22                                                                  |
| <b>Methods: Participants, interventions, and outcomes</b>                                                                            |          |                                                                                       |
| Study setting                                                                                                                        | 9        | Page 24, lines 14-15                                                                  |
| Eligibility criteria                                                                                                                 | 10       | Page 11, line 15 trough<br>page 14, line 14.                                          |
| Interventions                                                                                                                        | 11a      | Page 15, line 14 through<br>page 19, line 4                                           |
|                                                                                                                                      | 11b      | Page 17, lines 19-22                                                                  |



|                                                                     |     |                                                                                              |
|---------------------------------------------------------------------|-----|----------------------------------------------------------------------------------------------|
|                                                                     |     | Page 18, lines 12-17                                                                         |
|                                                                     | 11c | Not applicable                                                                               |
|                                                                     | 11d | Page 19, lines 5-16<br>Supplement 3                                                          |
| Outcomes                                                            | 12  | Page 14 line 15 through<br>page 15 line 13.                                                  |
| Participant timeline                                                | 13  | Figure 2                                                                                     |
| Sample size                                                         | 14  | Page 11, lines 8-10                                                                          |
| Recruitment                                                         | 15  | Page 11, lines 10-14                                                                         |
| <b>Methods: Assignment of interventions (for controlled trials)</b> |     |                                                                                              |
| Allocation                                                          | 16  | Not applicable                                                                               |
| Blinding (masking)                                                  | 17  | Not applicable                                                                               |
| <b>Methods: Data collection, management, and analysis</b>           |     |                                                                                              |
| Data collection methods                                             | 18a | Page 25, line 8 through<br>page 26 line 2.                                                   |
|                                                                     | 18b | Page 20, lines 1-5.                                                                          |
| Data management                                                     | 19  | Page 25, line 8 through<br>page 26 line 10.                                                  |
| Statistical methods                                                 | 20a | Page 20, line 19, through<br>page 21, line 3                                                 |
|                                                                     | 20b | Not applicable                                                                               |
|                                                                     | 20c | Page 20, lines 1-5.                                                                          |
| <b>Methods: monitoring</b>                                          |     |                                                                                              |
| Data monitoring                                                     | 21a | Page 20, lines 14-17,<br>supplement 5                                                        |
|                                                                     | 21b | Page 19 line 17 through<br>page 20 line 17,<br>supplement 4                                  |
| Harms                                                               | 22  | Page 16, line 20 through<br>page 17 line 3,<br>page 24, lines 17-20,<br>page 18, lines 18-19 |
| Auditing                                                            | 23  | Page 20, line 14,<br>page 25, lines 6-7                                                      |
| <b>Ethics and dissemination</b>                                     |     |                                                                                              |
| Research ethics approval                                            | 24  | Page 4, line 8,<br>page 24, lines 4-6                                                        |
| Protocol amendments                                                 | 25  | Page 24, lines 7-8                                                                           |
| Consent or assent                                                   | 26a | Page 24, lines 8-11,<br>supplement 6                                                         |
|                                                                     | 26b | Page 18, lines 21-22<br>supplement 6                                                         |

|                               |     |                                          |
|-------------------------------|-----|------------------------------------------|
| Confidentiality               | 27  | Page 25, line 8 through page 26 line 10  |
| Declaration of interests      | 28  | Page 28, line 2                          |
| Access to data                | 29  | Page 25, line 8 through page 26 line 10  |
| Ancillary and post-trial care | 30  | Page 24, line 20-21                      |
| Dissemination policy          | 31a | Page 24, line 11-12                      |
|                               | 31b | Not applicable                           |
|                               | 31c | Not applicable                           |
| <b>Appendices</b>             |     |                                          |
| Informed consent materials    | 32  | Supplement 6                             |
| Biological specimens          | 33  | Page 18, line 21, through page 19 line 4 |
