# Supplementary material for: Phase I feasibility study of Magnetic Resonance guided High Intensity Focused Ultrasound-induced hyperthermia, Lyso-Thermosensitive Liposomal Doxorubicin and cyclophosphamide in de novo stage IV breast cancer patients: study protocol of the i-GO study
Source: PubMed Central journal article supplement — BMJ Open. 2020 Nov 26;10(11):e040162. doi: 10.1136/bmjopen-2020-040162 (PMC7692846; doi:10.1136/bmjopen-2020-040162), 2020-11-26
Supplement: bmjopen-2020-040162supp001.pdf [file bmjopen-2020-040162supp001.pdf]

**Supplementary materials:**

|                                                                                                                |            |
|----------------------------------------------------------------------------------------------------------------|------------|
| <b>Supplement 1 Comparison of AUC<sub>0-∞</sub> of free doxorubicin for LTLD and conventional doxorubicin.</b> | <b>S2</b>  |
| <b>Supplement 2 Dose adjustments in the i-GO study.</b>                                                        | <b>S4</b>  |
| <b>Supplement 3 Restrictions to concomitant medications and products</b>                                       | <b>S10</b> |
| <b>Supplement 4 Flow-chart interim analysis</b>                                                                | <b>S21</b> |
| <b>Supplement 5 Data Safety Monitoring Board Charter</b>                                                       | <b>S22</b> |
| <b>Supplement 6 Patient informed consent form in English</b>                                                   | <b>S29</b> |

### Supplement 1 Comparison of AUC<sub>0-∞</sub> of free doxorubicin for LTLD and conventional doxorubicin.

In order to obtain a systemic dose of free doxorubicin (due to leakage of LTLD at 37 °C) that is as similar to conventional doxorubicin at 60 mg/m<sup>2</sup> (which is the standard of care treatment for the patients that will be enrolled in this study) as possible (to avoid undertreatment) we will start at the dose of 50 mg/m<sup>2</sup> LTLD, and we will apply dose adjustments when necessary. To compare the systemic dose of free doxorubicin after LTLD plus hyperthermia to the systemic dose of conventional doxorubicin, we summarized the pharmacokinetic data of the three studies with LTLD in which total plasma doxorubicin and the metabolite doxorubicinol were measured with a validated assay (studies 104-03-101 [1], 104-06-101 [2], and IND #174,188 [3]). In these studies the Area Under the Curve from t=0 to infinity (AUC<sub>0-∞</sub>) of the metabolite doxorubicinol was measured. Note that in these studies LTLD was administered with hyperthermia or RFA treatment. Pharmacokinetic data on LTLD without heating are not available. The mean values were converted to the AUC<sub>0-∞</sub> of 'free doxorubicin' based on the mean ratios between doxorubicinol and doxorubicin found in three studies (0.3826, 0.47 and 0.514 respectively, with a mean of 0.456) [4-6]. We compared these AUC<sub>0-∞</sub> values of 'free doxorubicin' from the LTLD studies with the AUC<sub>0-∞</sub> values of doxorubicin in pharmacokinetic studies of conventional doxorubicin [7-9]. Figure S2 displays the AUC<sub>0-∞</sub> of three studies with conventional doxorubicin (actual doxorubicin values are portrayed) and the AUC<sub>0-∞</sub> of three studies with LTLD (calculated 'free doxorubicin' values are portrayed). The figure shows that the calculated 'free doxorubicin' after LTLD 50 mg/m<sup>2</sup> is at least equal to that of conventional doxorubicin at 60 mg/m<sup>2</sup>.

**Figure S2: Comparison of the AUC<sub>0-∞</sub> of "free" plasma doxorubicin for LTLD + heat (calculated based on doxorubicinol concentration) and conventional doxorubicin.**

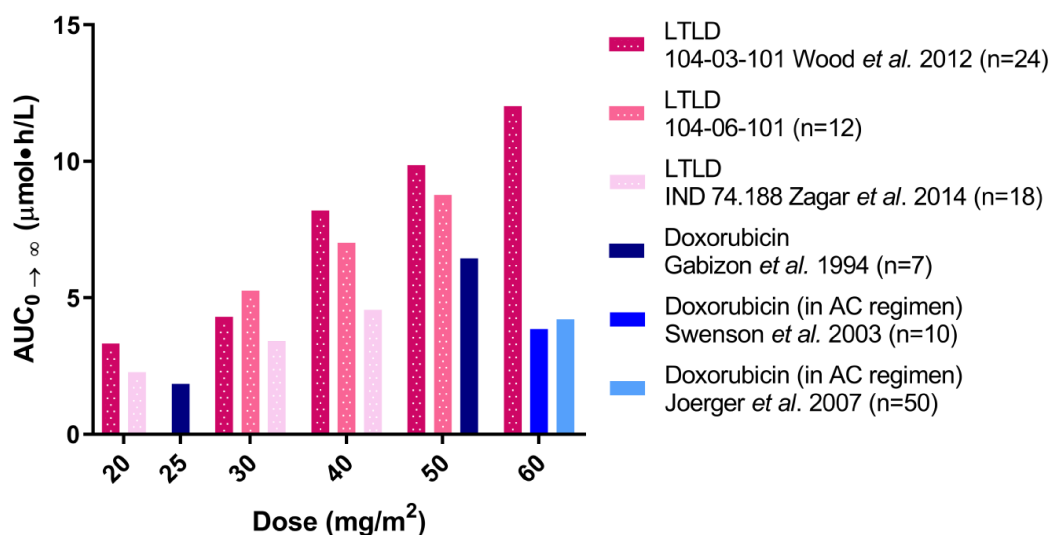

### Supplementary References

1. Wood BJ, Poon RT, Locklin JK, et al. Phase I study of heat-deployed liposomal doxorubicin during radiofrequency ablation for hepatic malignancies. *J Vasc Interv Radiol* 2012;23(2):248-55 e7.

2. Celsion Corporation. ThermoDox®, Lyso-Thermosensitive Liposomal Doxorubicin (LTLD), Investigator's Brochure. 2019.
3. Zagar TM, Vujaskovic Z, Formenti S, et al. Two phase I dose-escalation/pharmacokinetics studies of low temperature liposomal doxorubicin (LTLD) and mild local hyperthermia in heavily pretreated patients with local regionally recurrent breast cancer. *Int J Hyperthermia* 2014;30(5):285-94.
4. Jacquet JM, Bressolle F, Galtier M, et al. Doxorubicin and doxorubicinol: intra- and inter-individual variations of pharmacokinetic parameters. *Cancer Chemother Pharmacol* 1990;27(3):219-25.
5. Joerger M, Huitema AD, Meenhorst PL, et al. Pharmacokinetics of low-dose doxorubicin and metabolites in patients with AIDS-related Kaposi sarcoma. *Cancer Chemother Pharmacol* 2005;55(5):488-96.
6. Callies S, de Alwis DP, Wright JG, et al. A population pharmacokinetic model for doxorubicin and doxorubicinol in the presence of a novel MDR modulator, zosuquidar trihydrochloride (LY335979). *Cancer Chemother Pharmacol* 2003;51(2):107-18.
7. Gabizon A, Catane R, Uziely B, et al. Prolonged circulation time and enhanced accumulation in malignant exudates of doxorubicin encapsulated in polyethylene-glycol coated liposomes. *Cancer Res* 1994;54(4):987-92.
8. Swenson CE, Bolcsak LE, Batist G, et al. Pharmacokinetics of doxorubicin administered i.v. as Myocet (TLC D-99; liposome-encapsulated doxorubicin citrate) compared with conventional doxorubicin when given in combination with cyclophosphamide in patients with metastatic breast cancer. *Anticancer Drugs* 2003;14(3):239-46.
9. Joerger M, Huitema ADR, Richel DJ, et al. Population pharmacokinetics and pharmacodynamics of doxorubicin and cyclophosphamide in breast cancer patients. *Clin Pharmacokinet* 2007;46(12):1051-68.

## Supplement 2 Dose adjustments in the i-GO study.

Individual dose adjustments and/or delays may be made based on the emergence of specific adverse events.

Adverse events consist of:

- Systemic toxicity
- Locoregional toxicity

### S2.1 Systemic toxicity

#### Myelosuppression

Dose adjustments in case of myelosuppression are summarized in figure S2-1.

If ANC  $< 1.5 \times 10^9/L$ , then the LTLD and cyclophosphamide doses will be held and re-evaluated for treatment in one week. Any second occurrence of ANC  $< 1.5 \times 10^9/L$  will require a decrease in LTLD dose to  $40 \text{ mg/m}^2$ . The cyclophosphamide will remain unchanged. LTLD and cyclophosphamide will be administered at day 14 (two weeks after the scheduled dose) if the ANC  $\geq 1.5 \times 10^9/L$ . In case of recurrence of ANC  $< 1.5 \times 10^9/L$  with the decreased LTLD dose, study participation will end and the patient will continue treatment with the standard of care AC regimen.

If platelets are  $< 100 \times 10^9/L$ , then the LTLD and cyclophosphamide doses will be held and re-evaluated for treatment in one week. Any second occurrence of platelets  $< 100 \times 10^9/L$  will require a decrease in LTLD dose to  $40 \text{ mg/m}^2$ . The cyclophosphamide will remain unchanged. These doses will be administered at day 14 (two weeks after the scheduled dose) if the platelets are  $\geq 100 \times 10^9/L$ . In case of recurrence of platelets  $< 100 \times 10^9/L$  with the decreased LTLD dose, study participation will end and the patient will continue treatment with the standard of care AC regimen.

If a patient requires drug-withholding for more than 14 days, then the patient will be withdrawn from the study.

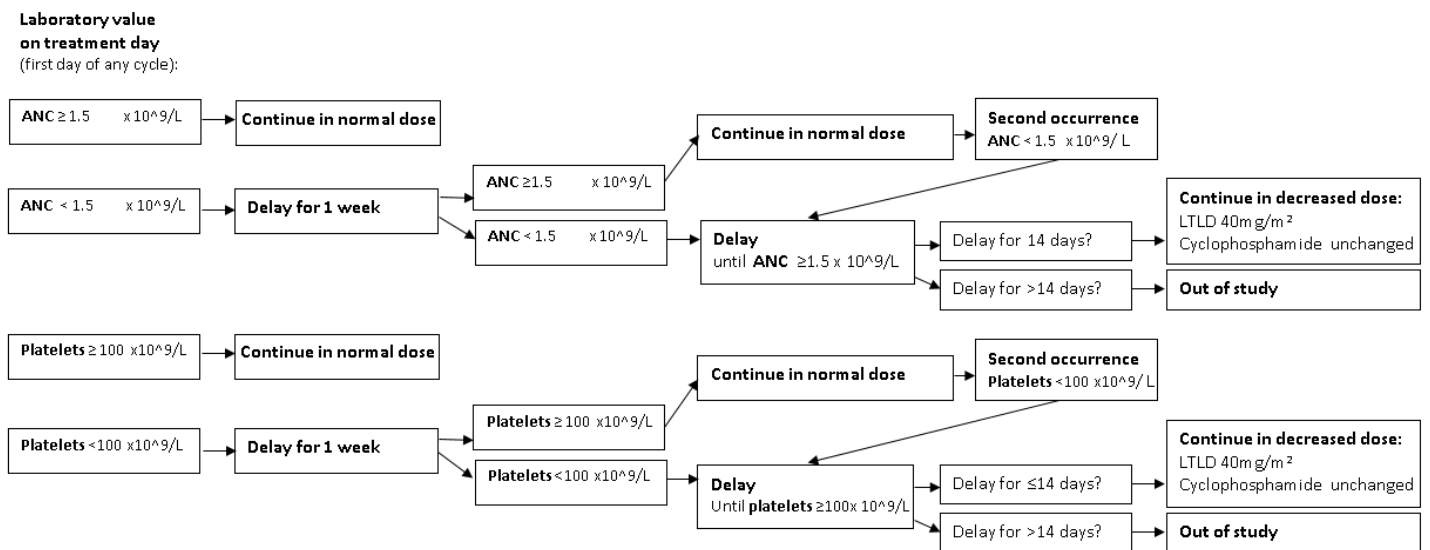

**Figure S2.1: Flow chart of dose adjustments for myelosuppression**

### Hypersensitivity reactions

No dose reductions will be made for hypersensitivity reactions.

**Table S2: Suggested Management for Hypersensitivity Reactions**

| Severity of Symptoms                                                                                                                                                                                                                                                        | Treatment Guidelines                                                                                                                                                   |
|-----------------------------------------------------------------------------------------------------------------------------------------------------------------------------------------------------------------------------------------------------------------------------|------------------------------------------------------------------------------------------------------------------------------------------------------------------------|
| <u>Mild</u> symptoms: localized cutaneous reactions such as mild pruritus, mild flushing, mild rash (Grades 0-1)                                                                                                                                                            | Consider decreasing the rate of infusion until recovery from symptoms, stay at bedside and monitor patient<br>Complete study drug infusion at the initial planned rate |
| <u>Moderate to Severe</u> symptoms: any symptom that is not mild (see list above) such as generalized pruritus, generalized flushing, generalized rash, dyspnea, hypotension with systolic BP < 80 mm Hg, bronchospasm, angioedema and generalized angioedema. (Grades 2-4) | WITHDRAW FROM STUDY                                                                                                                                                    |
| <u>Anaphylaxis</u> (Grade 4)                                                                                                                                                                                                                                                | WITHDRAW FROM STUDY                                                                                                                                                    |

### Abnormal Liver Tests

If a patient develops abnormal liver tests, they will be evaluated for causal factors such as bile duct obstruction or liver pathology, with an abdominal ultrasound. If a cause is found, this must be resolved before continuing the treatment. If no other cause than the study treatment is found (or the cause cannot be resolved), patients will have the following dose reductions (summarized in figure S2-2).

If bilirubin  $\geq 25$   $\mu\text{mol/L}$ , then the LTLD and cyclophosphamide doses will be held and re-evaluated for treatment in one week. Any second occurrence of bilirubin  $\geq 25$   $\mu\text{mol/L}$  will require a dose adjustment to  $40\text{mg/m}^2$  LTLD. If the bilirubin is still  $25\text{--}50$   $\mu\text{mol/L}$  after one week, the patient will be treated with a decrease in LTLD dose to  $25\text{ mg/m}^2$  (50% of the original dose) and unchanged cyclophosphamide dose. If the bilirubin has normalized  $< 25$   $\mu\text{mol/L}$  after one week, the patient will be treated with a decrease in LTLD dose to  $40\text{ mg/m}^2$ , the cyclophosphamide dose will remain unchanged. In case bilirubin  $\geq 25$   $\mu\text{mol/L}$  recurs after previous LTLD dose reduction, study participation will end and the patient will continue treatment with the standard of care AC regimen.

If the bilirubin  $\geq 50$   $\mu\text{mol/L}$ , treatment will be delayed until  $< 50$   $\mu\text{mol/L}$ . If a patient requires drug-withholding for more than 14 days, then she will be withdrawn from the study.

If bilirubin  $< 25\mu\text{mol/L}$  and AF  $\leq 600$  U/L, but ASAT and ALAT are mildly elevated ( $1.6\text{--}3.5\text{xULN}$ ), the patient will be treated with a decrease in LTLD dose to  $40\text{ mg/m}^2$  and unchanged cyclophosphamide dose, without delay. In case mildly elevated ASAT or ALAT recur after previous LTLD dose reduction, study participation will end and the patient will continue treatment with the standard of care AC regimen.

If AF  $> 5\text{xULN}$  ( $>600\text{U/L}$ ) or ASAT  $> 3,5\text{xULN}$  ( $>105\text{U/L}$ ) or ALAT  $> 3,5\text{xULN}$  ( $>123\text{ U/L}$ ), treatment will be delayed until liver tests have recovered (bili  $< 25$   $\mu\text{mol/L}$ , AF  $\leq 5\text{xULN}$  and ASAT/ALAT  $\leq 3.5\text{xULN}$ ). Then the patient will be treated with a decrease in LTLD dose to  $40\text{ mg/m}^2$  and unchanged cyclophosphamide dose. In case the elevated AF ( $> 5\text{xULN}$ ), ASAT ( $> 3,5\text{xULN}$ ) or ALAT ( $> 3,5\text{xULN}$ ) recur after the LTLD dose reduction, study participation will end and the patient will continue treatment with the standard of care AC regimen.

If a patient requires drug-withholding for more than 14 days, then she will be withdrawn from the study.

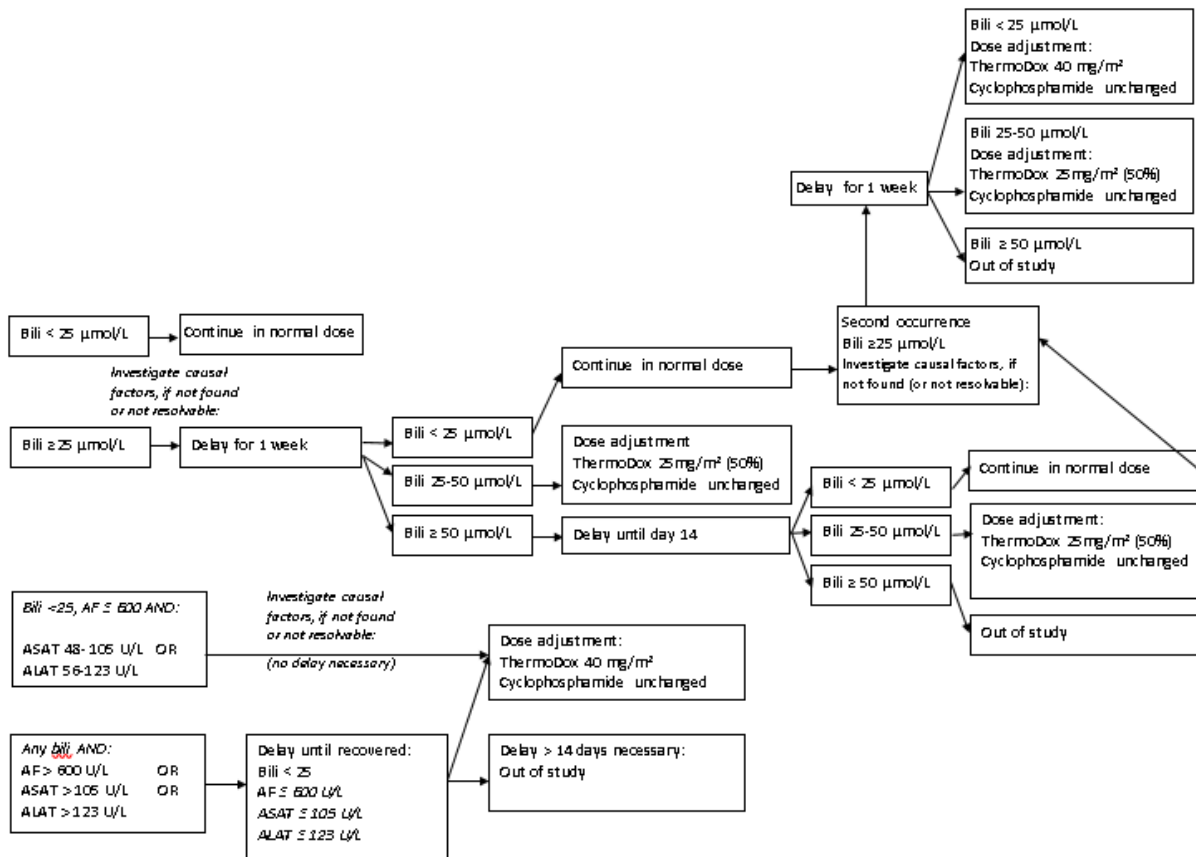

**Figure S2.2: Flow chart of dose adjustments for abnormal liver tests**

### Mucositis

If mucositis is present on any treatment day, then treatment should be held until mucositis has resolved. If mucositis of Grade  $\geq 3$  occurs, then reduce the dose of LTLD to  $40 \text{ mg/m}^2$ , while the cyclophosphamide dose remains unchanged for subsequent cycles. In case mucositis of grade  $\geq 3$  recurs after the LTLD dose reduction, study participation will end and the patient will continue treatment with the standard of care AC regimen. If a patient requires drug-withholding for more than 14 days, then the patient will be withdrawn from the study.

### Ventricular Function

Patients who are receiving protocol therapy will be removed from study treatment under the following conditions:

Signs (tachycardia, S3, elevated jugular venous pressure) AND symptoms of congestive heart failure (edema, dyspnea, paroxysmal nocturnal dyspnea, orthopnea) OR  
a decline in LVEF of  $> 15\%$  while the LVEF remains  $> 40\%$  OR  
a decline to an LVEF of  $\leq 40\%$ .

Patients in this category should be followed with an ejection fraction assessment every three months until stable.

**Other adverse events**

For other non-hematologic toxicity  $\geq$  grade 3, no dose modification is required. Instead, such subjects will not be re-treated until the severity of the non-hematologic toxicity drops to  $\leq$  grade 1. If a patient requires drug-withholding for more than 14 days, then the patient will be removed from the trial.

**S2.2 Locoregional toxicity****Post-procedural pain**

If a patient experiences post-procedural pain in the treated breast with:

- a Numeric Rate Scale (NRS) of 7 or higher (severe pain) for more than 60 minutes within 24u hours without pain medication, OR
- a NRS of 5 or higher (moderate to severe pain) for more than 60 minutes within 24u hours that does not respond to adequate pain medication,
- Any pain that the patients finds unacceptable or unbearable

then in the next cycle the hyperthermia time will be reduced by 25%: 45 minutes of MR-HIFU treatment. This level of pain is also considered a dose limiting loco-regional toxicity (loco-regional DLT).

If the patient experiences the above specified level of pain again after the hyperthermia time reduction, de time will be reduced further to 30 minutes of MR-HIFU treatment.

If the above specified level of pain still persists/recurs the patient will be withdrawn from the trial.

**Skin effects**

If a grade 1 (CTCAE) skin burn is occurs on the treated breast on any treatment day, then treatment should be held until the skin burn has resolved.

If a patient requires treatment withholding for more than 14 days, then the patient will be removed from the trial.

If the skin burn is resolved in  $\leq$  14 days the hyperthermia time in the next cycle will be reduced by 25%: 45 minutes of MR-HIFU treatment. If a grade 1 skin burn recurs after dose reduction the hyperthermia time will be further reduced to 30 minutes of MR-HIFU treatment. If the burn recurs after that, the patient will be withdrawn from the study.

If a grade 2 burn occurs on the treated breast the patient will immediately be withdrawn from the study.

For other adverse effects of the skin of the treated breast, that are suspected to be related to the study treatment, treatment will be delayed until the severity of the skin toxicity drops to  $\leq$  grade 1. The hyperthermia time will be reduced by 25% in the next cycle. If a patient requires treatment withholding for more than 14 days, then the patient will be removed from the trial. Skin burns and other adverse effects of the skin of the treated breast of grade 1 or higher are considered dose limiting loco-regional toxicities (loco-regional DLTs).

**S2.3 Dose adjustments, dose delay or withdrawal from study, based on technical difficulties**



In the study design we specified that we aim to perform 60 minutes of hyperthermia to the primary tumor at a temperature of 40°C-42°C, however, the ability to achieve this is also a feasibility parameter. It is possible that in certain patients, the aim will not be achieved, which will lead to an individual (unintended) adjustment of hyperthermia dose in that case. Furthermore, if MR-thermometry is insufficiently accurate to provide a safe MR-HIFU treatment, that treatment is stopped for safety reasons and the patient will receive the standard treatment of doxorubicin and cyclophosphamide.

If we experience technical difficulties during the MR-HIFU treatment (such as dysfunction of the MR-HIFU method, loss of power, mechanical difficulties) and we cannot guarantee the safety and feasibility of an individual patient's MR-HIFU treatment, the patient will receive the standard treatment of doxorubicin and cyclophosphamide.

After the technical difficulties have been resolved, the patient can still receive MR-HIFU and LTLD in the next treatment cycle or cycles.

If for one patient, hyperthermia treatment was for any reason insufficient (i.e. the target temperature 40-42°C was not reached or was only maintained for less than 30 minutes), in two separate treatment cycles, the patient will be excluded from the study, because the treatment is not considered feasible for that patient.

If the target temperature of 40-42°C is not reached, LTLD will not be administered (paragraph 8.3.15). Instead, conventional doxorubicin will be administered. However, if the temperature is initially reached, LTLD infusion is started and shortly afterwards the temperature becomes and remains insufficient, LTLD infusion will be continued as planned. In this case it is no longer possible to replace LTLD with conventional doxorubicin, as this would lead to an unreliable dose. If this scenario occurs twice the patient will be excluded from the study, as described above.

### **Supplement 3 Restrictions to concomitant medications and products**

Concurrent use of any of the following medications is strictly prohibited: protease inhibitors, cyclosporine, carbamazepine, phenytoin, valproic acid, paclitaxel, trastuzumab and other liposomal drugs (Abelect™, Ambisome™, Nyotran™, etc.) or lipid-complexed drugs

Doxorubicin is a substrate of CYP3A4, CYP2D6 and P-glycoprotein (P-gp). As detailed in in table S3-1, inducers and inhibitors of these enzymes, as well as medication that acts with doxorubicin via other pathways could result in drug interactions. Caution will be exercised with regard to all the medications mentioned in table S3-1, for interactions are theoretically possible. If deemed necessary, clinically safe and feasible, these medications will be withheld or substituted before participation in the study.

Pre-specified exceptions were made for cyclophosphamide, dexamethasone, propofol, aprepitant and clemastine. These medications will be used as explained in appendix C.

Liposomal drugs (Abelect™, Ambisome™, Nyotran™, etc.), or lipid-complexed drugs, or intravenous fat emulsions could change the pharmacokinetic profile of LTLT and should not be administered to study subjects while on the trial.

Subjects may take any medication that is not restricted by the protocol and would not be expected to interfere with the intent and conduct of the study. Chronic medications should be dosed on a stable regimen, if possible. In case of medications restricted by the protocol, adequate washout times must be observed. All medications at the time of screening and within 30 days prior to study treatment and other treatments taken by the subject during the study, including those treatments initiated prior to enrollment (ICF signing), must be recorded.

**Table S3.1 Concomitant medications and products with possible interactions**

| Sources: (1-6)                        | Increased risk of toxicity               | CYP3A4    | CYP2D6 | P-gp      | Wash-out |
|---------------------------------------|------------------------------------------|-----------|--------|-----------|----------|
| <b>Antineoplastic therapy</b>         |                                          |           |        |           |          |
| bortezomib                            |                                          | inhibitor |        |           |          |
| cyclophosphamide <sup>1</sup>         | Cardiotoxicity /<br>hemorrhagic cystitis | inhibitor |        |           |          |
| cytarabine                            | Miscellaneous <sup>2</sup>               |           |        |           |          |
| dasatinib                             |                                          | inhibitor |        |           |          |
| docetaxel                             |                                          | inhibitor |        |           |          |
| etoposide                             |                                          | inhibitor |        |           |          |
| 5-fluorouracil                        | Cardiotoxicity                           |           |        |           |          |
| ifosfamide                            |                                          | inhibitor |        |           |          |
| imatinib                              |                                          | inhibitor |        |           |          |
| lapatinib                             |                                          |           |        | inhibitor |          |
| lomustine                             |                                          | inhibitor |        |           |          |
| 6-mercaptopurin:<br>6-MP / purinethol | Hepatotoxicity                           |           |        |           |          |
| methotrexate                          | Hepatotoxicity                           |           |        |           |          |
| methoxsalen                           |                                          | inhibitor |        |           |          |
| mitoxantrone                          |                                          | inhibitor |        |           |          |
| nafcillin                             |                                          | inducer   |        |           |          |
| paclitaxel                            | Cardiotoxicity                           |           |        |           |          |
| plicamycin***                         | Hematologic                              |           |        |           |          |
| nifamycin agents (all)                |                                          | inducer   |        |           | 14 days  |
| nifabutin                             |                                          | inducer** |        |           | 14 days  |
| nifampicin                            |                                          | inducer** |        | inducer** | 14 days  |
| nifapentine                           |                                          | inducer   |        |           | 14 days  |

<sup>1</sup> Pre-specified exceptions are described below

<sup>2</sup> Necrotizing colitis manifested by typhilitis (caecal inflammation), bloody stools, and severe and sometimes fatal infections have been associated with a combination of doxorubicin given by intravenous push daily for 3 days and cytarabine given by continuous infusion daily for 7 or more days. Source: Pfizer 2010.

\* Mentioned as powerful inhibitor/inducer in the KNMP Kennisbank.

Note: Relevance of an interaction also depends on properties of the substrate, such as therapeutical width, biological availability or another route of metabolism.

[https://kennisbank.knmp.nl/article/Informatorium\\_Medicamentorum/G1126.html](https://kennisbank.knmp.nl/article/Informatorium_Medicamentorum/G1126.html)

\*\* Mentioned as inhibitor/inducer in the KNMP Kennisbank

[https://kennisbank.knmp.nl/article/Informatorium\\_Medicamentorum/G1126.html](https://kennisbank.knmp.nl/article/Informatorium_Medicamentorum/G1126.html)

\*\*\* Prohibited medication in the Phase I trial at Duke (IND#74,188)

**Table S3.1 Concomitant medications and products with possible interactions (continued)**

|                                      | Increased risk of toxicity                                                            | CYP3A4    | CYP2D6    | P-gp        | Wash-out |
|--------------------------------------|---------------------------------------------------------------------------------------|-----------|-----------|-------------|----------|
| sorafenib <sup>3</sup>               | Possible dose modification                                                            |           |           |             |          |
| streptozocin***                      | Hematologic                                                                           |           |           |             |          |
| teniposide                           |                                                                                       | inhibitor |           |             |          |
| trastuzumab                          | Cardiotoxicity                                                                        |           |           |             | 24 weeks |
| vinblastine                          |                                                                                       | inhibitor |           |             |          |
| vincristine                          |                                                                                       | inhibitor |           |             |          |
| vinorelbine                          |                                                                                       | inhibitor |           |             |          |
| <b>(anti-) Hormonal medication</b>   |                                                                                       |           |           |             |          |
| abirateron                           |                                                                                       |           | inhibitor |             |          |
| anastrozole                          |                                                                                       | inhibitor |           |             |          |
| danazol                              |                                                                                       | inhibitor |           |             |          |
| drospirenone                         |                                                                                       | inhibitor |           |             |          |
| ethinyl estradiol                    |                                                                                       | inhibitor |           |             |          |
| mestranol                            |                                                                                       | inhibitor |           |             |          |
| mifepristone                         |                                                                                       | inhibitor |           |             |          |
| progesterone <sup>4</sup>            | Hematologic                                                                           | inhibitor |           |             |          |
| tamoxifen                            |                                                                                       | inhibitor |           |             |          |
| testosterone                         |                                                                                       | inhibitor |           |             |          |
| <b>Calcium channel blockers</b>      |                                                                                       |           |           |             |          |
| amlodipine                           |                                                                                       | inhibitor |           |             |          |
| diltiazem                            | Cardiotoxicity                                                                        | inhibitor |           |             | 7 days   |
| felodipine                           |                                                                                       | inhibitor |           |             |          |
| nicardipine (cardene)                |                                                                                       | inhibitor |           |             |          |
| nifedipine                           |                                                                                       | inhibitor |           |             |          |
| nisoldipine                          |                                                                                       | inhibitor |           |             |          |
| verapamil                            | Cardiotoxicity                                                                        | inhibitor |           | inhibitor** | 7 days   |
|                                      | <i>Hospital pharmacist's advice: in case of this interaction, no action is needed</i> |           |           |             |          |
| <b>Bêtablockers</b>                  |                                                                                       |           |           |             |          |
| propranolol                          | Cardiotoxicity                                                                        |           |           |             |          |
| carvedilol                           |                                                                                       |           |           | inhibitor   |          |
| <b>Angiotensin receptor blockers</b> |                                                                                       |           |           |             |          |
| irbesartan                           |                                                                                       | inhibitor |           |             |          |
| losartan                             |                                                                                       | inhibitor |           |             |          |

<sup>3</sup> In clinical studies, both an increase of 21% and 47%, and no change in the AUC of doxorubicin were observed with concomitant treatment with sorafenib 400 mg twice daily. The clinical significance of these findings is unknown. Source: Pfizer 2010.

<sup>4</sup> In a published study, progesterone was given intravenously to patients with advanced malignancies (ECOG PS< 2 ) at high doses ( up to 10 g over 24 hours ) 12 concomitantly with a fixed doxorubicin dose ( 60 mg/m<sup>2</sup> ) via bolus injection. Enhanced doxorubicin-induced neutropenia and thrombocytopenia were observed. Source: Pfizer 2010.

\* Mentioned as powerful inhibitor/inducer in the KNMP Kennisbank.

Note: Relevance of an interaction also depends on properties of the substrate, such as therapeutical width, biological availability or another route of metabolism.

[https://kennisbank.knmp.nl/article/informatarium\\_Medicamentorum/G1126.html](https://kennisbank.knmp.nl/article/informatarium_Medicamentorum/G1126.html)

\*\* Mentioned as inhibitor/inducer in the KNMP Kennisbank

[https://kennisbank.knmp.nl/article/informatarium\\_Medicamentorum/G1126.html](https://kennisbank.knmp.nl/article/informatarium_Medicamentorum/G1126.html)

\*\*\* Prohibited medication in the Phase I trial at Duke (IND#74,188)

**Table S3.1 Concomitant medications and products with possible interactions (continued)**

| <b>Anti-arrhythmic agents</b>                                                                                                                                                               |                                   |                        |                        |             |                 |
|---------------------------------------------------------------------------------------------------------------------------------------------------------------------------------------------|-----------------------------------|------------------------|------------------------|-------------|-----------------|
|                                                                                                                                                                                             | <b>Increased risk of toxicity</b> | <b>CYP3A4</b>          | <b>CYP2D6</b>          | <b>P-gp</b> | <b>Wash-out</b> |
| amiodarone                                                                                                                                                                                  |                                   | inhibitor              | inhibitor              | inhibitor** | 6 months        |
| dronedarone                                                                                                                                                                                 |                                   |                        |                        | inhibitor   |                 |
| propafenone                                                                                                                                                                                 |                                   |                        | inhibitor              | inhibitor   |                 |
| quinidine (kinidine)                                                                                                                                                                        |                                   | inhibitor              | powerful*<br>inhibitor | inhibitor** |                 |
| <b>Statins</b>                                                                                                                                                                              |                                   |                        |                        |             |                 |
| atorvastatin                                                                                                                                                                                |                                   | inhibitor              |                        |             |                 |
| fluvastatin                                                                                                                                                                                 |                                   | inhibitor              |                        |             |                 |
| lovastatin                                                                                                                                                                                  |                                   | inhibitor              |                        |             |                 |
| pravastatin                                                                                                                                                                                 |                                   | inhibitor              |                        |             |                 |
| <b>Anticonvulsants</b>                                                                                                                                                                      |                                   |                        |                        |             |                 |
| <i>Hospital pharmacist's advice: the concentration of phenytoin and other antiepileptics can be affected by oncolytics, decreasing the antiepileptic effect. Dose adjustment is needed.</i> |                                   |                        |                        |             |                 |
| barbiturate agents                                                                                                                                                                          |                                   | inducer                |                        |             |                 |
| <i>Hospital pharmacist's advice: interaction is only theoretical, no action is needed</i>                                                                                                   |                                   |                        |                        |             |                 |
| carbamazepine <sup>5</sup>                                                                                                                                                                  |                                   | inducer**              |                        | inducer**   |                 |
| fosphenytoin <sup>5</sup>                                                                                                                                                                   |                                   | inducer                |                        |             |                 |
| pentobarbital                                                                                                                                                                               |                                   | inducer                |                        |             |                 |
| phenobarbital***                                                                                                                                                                            |                                   | inducer**              |                        | inducer**   |                 |
| phenytoin <sup>5***</sup>                                                                                                                                                                   |                                   | inducer**              |                        | inducer**   |                 |
| primidone                                                                                                                                                                                   |                                   | inducer**              |                        | inducer**   |                 |
| oxcarbazepine                                                                                                                                                                               |                                   | inducer                |                        |             |                 |
| valproic acid (depakine) <sup>5</sup>                                                                                                                                                       |                                   | inhibitor              |                        |             |                 |
| <b>Antidepressants</b>                                                                                                                                                                      |                                   |                        |                        |             |                 |
| bupropion                                                                                                                                                                                   |                                   |                        | powerful*<br>inhibitor |             |                 |
| desipramine                                                                                                                                                                                 |                                   | inhibitor              |                        |             |                 |
| duloxetine                                                                                                                                                                                  |                                   |                        | inhibitor              |             |                 |
| fluoxetine                                                                                                                                                                                  |                                   | powerful*<br>inhibitor |                        |             |                 |
| fluvoxamine                                                                                                                                                                                 |                                   | inhibitor              |                        |             | 7 days          |
| mirtazapine                                                                                                                                                                                 |                                   | inhibitor              |                        |             |                 |
| nefazodone                                                                                                                                                                                  |                                   | inhibitor              |                        |             | 7 days          |
| norfluoxetine                                                                                                                                                                               |                                   | ?                      | inhibitor              |             |                 |
| paroxetine                                                                                                                                                                                  |                                   | inhibitor              | powerful*<br>inhibitor |             |                 |
| selegiline                                                                                                                                                                                  |                                   | inhibitor              |                        |             |                 |
| sertraline                                                                                                                                                                                  |                                   | inhibitor              | inhibitor              |             |                 |
| tranylcypromine                                                                                                                                                                             |                                   | inhibitor              |                        |             |                 |
| trazodone                                                                                                                                                                                   |                                   | inhibitor              |                        |             |                 |
| venlafaxine                                                                                                                                                                                 |                                   | inhibitor              |                        |             |                 |

<sup>5</sup> The levels of carbamazepine, phenytoin and valproic acid can temporarily be affected by doxorubicin, with the risk of sub effective anti-epileptic dosage.

\* Mentioned as powerful inhibitor/inducer in the KNMP Kennisbank.

Note: Relevance of an interaction also depends on properties of the substrate, such as therapeutic width, biological availability or another route of metabolism.

[https://kennisbank.knmp.nl/article/Informatorium\\_Medicamentorum/G1126.html](https://kennisbank.knmp.nl/article/Informatorium_Medicamentorum/G1126.html)

\*\* Mentioned as inhibitor/inducer in the KNMP Kennisbank

[https://kennisbank.knmp.nl/article/Informatorium\\_Medicamentorum/G1126.html](https://kennisbank.knmp.nl/article/Informatorium_Medicamentorum/G1126.html)

\*\*\* Prohibited medication in the Phase I trial at Duke (IND#74,188)

Table S3.1 Concomitant medications and products with possible interactions (continued)

|                                  | Increased risk of toxicity                                                                               | CYP3A4                 | CYP2D6 | P-gp         | Wash-out |
|----------------------------------|----------------------------------------------------------------------------------------------------------|------------------------|--------|--------------|----------|
| <b>Antipsychotics</b>            |                                                                                                          |                        |        |              |          |
| clozapine                        | Hematologic                                                                                              | inhibitor              |        |              |          |
| haloperidol                      |                                                                                                          | inhibitor              |        |              |          |
| olanzapine                       |                                                                                                          | inhibitor              |        |              |          |
| pimozide                         |                                                                                                          | inhibitor              |        |              |          |
|                                  | Increased risk of toxicity                                                                               | CYP3A4                 | CYP2D6 | P-gp         | Wash-out |
| risperidone                      |                                                                                                          | inhibitor              |        |              |          |
| ziprasidone                      |                                                                                                          | inhibitor              |        |              |          |
| <b>Thyreostatics ***</b>         |                                                                                                          |                        |        |              |          |
| thionamids: e.g.                 | Hematologic                                                                                              |                        |        |              |          |
| carbimazole                      | Hematologic                                                                                              |                        |        |              |          |
| propylthiouracil                 | Hematologic                                                                                              |                        |        |              |          |
| thiamazol/ methimazole           | Hematologic                                                                                              | inhibitor              |        |              |          |
| <b>Immune suppressive agents</b> |                                                                                                          |                        |        |              |          |
| azathioprine***                  | Hematologic/<br>Immune suppressive                                                                       |                        |        |              |          |
| cyclosporine/cyclosporine<br>*** | Immune suppressive                                                                                       | inhibitor              |        | inhibitor**  |          |
|                                  | <i>Hospital pharmacist's advice: The combination of anthracyclines and ciclosporin should be avoided</i> |                        |        |              |          |
| interferon                       | Hematologic                                                                                              |                        |        |              |          |
| sirolimus                        |                                                                                                          | inhibitor              |        |              |          |
| tacrolimus                       |                                                                                                          | inhibitor              |        |              |          |
| <b>Antibiotics</b>               |                                                                                                          |                        |        |              |          |
| azithromycin                     |                                                                                                          | inhibitor              |        |              |          |
| chloramphenicol***               | Hematologic                                                                                              | inhibitor              |        |              |          |
| clarithromycin                   |                                                                                                          | powerful*<br>inhibitor |        | inhibitor    | 7 days   |
| ciprofloxacin                    |                                                                                                          | inhibitor              |        |              |          |
| doxycycline                      |                                                                                                          | inhibitor              |        |              |          |
| erythromycin                     |                                                                                                          | powerful*<br>inhibitor |        | inhibitor ** | 7 days   |
| norfloxacin                      |                                                                                                          | inhibitor              |        |              |          |
| quinupristin                     |                                                                                                          | inhibitor              |        |              |          |
| telithromycin                    |                                                                                                          | inhibitor              |        |              |          |
| tetracycline                     |                                                                                                          | inhibitor              |        |              |          |
| troleandomycin                   |                                                                                                          | inhibitor              |        |              | 7 days   |
| <b>Antimycotics</b>              |                                                                                                          |                        |        |              |          |
| amphotericin B***                | Nephrotoxicity                                                                                           |                        |        |              |          |
| clotrimoxazole                   |                                                                                                          | inhibitor              |        |              |          |
| fluconazole                      |                                                                                                          | inhibitor              |        |              | 7 days   |
| flucytosine***                   | Hematologic                                                                                              |                        |        |              |          |
| itraconazole                     |                                                                                                          | powerful*<br>inhibitor |        | inhibitor    | 7 days   |
| ketoconazole                     |                                                                                                          | powerful*<br>inhibitor |        | inhibitor**  | 7 days   |

\* Mentioned as powerful inhibitor/inducer in the KNMP Kennisbank.

Note: Relevance of an interaction also depends on properties of the substrate, such as therapeutical width, biological availability or another route of metabolism.

[https://kennisbank.knmp.nl/article/Informatorium\\_Medicamentorum/G1126.html](https://kennisbank.knmp.nl/article/Informatorium_Medicamentorum/G1126.html)

\*\* Mentioned as inhibitor/inducer in the KNMP Kennisbank

[https://kennisbank.knmp.nl/article/Informatorium\\_Medicamentorum/G1126.html](https://kennisbank.knmp.nl/article/Informatorium_Medicamentorum/G1126.html)

\*\*\* Prohibited medication in the Phase I trial at Duke (IND#74,188)

**Table S3.1 Concomitant medications and products with possible interactions (continued)**

|                                                                                                                                                                                        | Increased risk of toxicity | CYP3A4                 | CYP2D6                 | P-gp        | Wash-out |
|----------------------------------------------------------------------------------------------------------------------------------------------------------------------------------------|----------------------------|------------------------|------------------------|-------------|----------|
| metronidazole                                                                                                                                                                          |                            | inhibitor              |                        |             |          |
| miconazole                                                                                                                                                                             |                            | inhibitor              |                        |             |          |
| posaconazol                                                                                                                                                                            |                            | inhibitor              |                        |             |          |
| sulconazole                                                                                                                                                                            |                            | inhibitor              |                        |             |          |
| terbinafine                                                                                                                                                                            |                            |                        | inhibitor              |             |          |
| voriconazole                                                                                                                                                                           |                            | powerful*<br>inhibitor |                        |             | 7 days   |
| <b>Anti (retro-) viral agents</b>                                                                                                                                                      |                            |                        |                        |             |          |
| <i>Hospital pharmacist's advice: In case of HIV-protease inhibitors, the interaction will always be discussed with the local pharmacist, doxorubicin is discouraged in this group.</i> |                            |                        |                        |             |          |
| atazanavir                                                                                                                                                                             |                            | Inhibitor              |                        |             |          |
| amprenavir                                                                                                                                                                             |                            | Inhibitor              |                        |             | 7 days   |
| boceprevir                                                                                                                                                                             |                            | Inhibitor              |                        |             |          |
| cobicistat                                                                                                                                                                             |                            | powerful*<br>inhibitor |                        | inhibitor** |          |
| delavirdine                                                                                                                                                                            |                            | Inhibitor              |                        |             | 7 days   |
| efavirenz                                                                                                                                                                              |                            | inducer                |                        |             |          |
| fosamprenavir                                                                                                                                                                          |                            | Inhibitor              |                        |             |          |
| ganciclovir***                                                                                                                                                                         | Hematologic                |                        |                        |             |          |
| indinavir                                                                                                                                                                              |                            | Inhibitor              |                        |             | 7 days   |
| interferon***                                                                                                                                                                          | Hematologic                |                        |                        |             |          |
| lopinavir                                                                                                                                                                              |                            | Inhibitor              |                        | inhibitor** | 7 days   |
| nelfinavir                                                                                                                                                                             |                            | Inhibitor              |                        |             | 7 days   |
| nevirapine                                                                                                                                                                             |                            | Inducer                |                        |             |          |
| ritonavir                                                                                                                                                                              |                            | powerful*<br>Inhibitor | powerful*<br>inhibitor | inhibitor** | 7 days   |
| saquinavir                                                                                                                                                                             |                            | Inhibitor              |                        | inhibitor   | 7 days   |
| simeprevir                                                                                                                                                                             |                            |                        |                        | inhibitor** |          |
| telaprevir                                                                                                                                                                             |                            |                        |                        | inhibitor   |          |
| tipranavir                                                                                                                                                                             |                            |                        |                        | inhibitor   |          |
| zidovudine***                                                                                                                                                                          | Hematologic                |                        |                        |             |          |
| <b>Miscellaneous anti-infectious agents</b>                                                                                                                                            |                            |                        |                        |             |          |
| clofazimine                                                                                                                                                                            |                            | Inhibitor              |                        |             |          |
| isoniazid                                                                                                                                                                              |                            | Inhibitor              |                        |             |          |
| mefloquine                                                                                                                                                                             |                            | Inhibitor              |                        |             |          |
| pentamidine                                                                                                                                                                            |                            | Inhibitor              |                        |             |          |
| primaquine                                                                                                                                                                             |                            | Inhibitor              |                        |             |          |
| quinine (kinine)                                                                                                                                                                       |                            | Inhibitor              | inhibitor              |             |          |
| <b>Glucocorticoids<sup>6</sup></b>                                                                                                                                                     |                            |                        |                        |             |          |
| betamethasone                                                                                                                                                                          |                            | inducer                |                        |             |          |
| cortisone (> 50 mg)                                                                                                                                                                    |                            | inducer                |                        |             | 14 days  |
| dexamethasone (> 1.5 mg <sup>7</sup> )                                                                                                                                                 |                            | inducer                |                        | inducer     | 14 days  |

\* Mentioned as powerful inhibitor/inducer in the KNMP Kennisbank.

Note: Relevance of an interaction also depends on properties of the substrate, such as therapeutical width, biological availability or another route of metabolism.

[https://kennisbank.knmp.nl/article/Informatorium\\_Medicamentorum/G1126.html](https://kennisbank.knmp.nl/article/Informatorium_Medicamentorum/G1126.html)

\*\* Mentioned as inhibitor/inducer in the KNMP Kennisbank

[https://kennisbank.knmp.nl/article/Informatorium\\_Medicamentorum/G1126.html](https://kennisbank.knmp.nl/article/Informatorium_Medicamentorum/G1126.html)

\*\*\* Prohibited medication in the Phase I trial at Duke (IND#74,188)



**Table S3.1 Concomitant medications and products with possible interactions (continued)**

|                                                                                                      | Increased risk of toxicity | CYP3A4    | CYP2D6 | P-gp | Wash-out                |
|------------------------------------------------------------------------------------------------------|----------------------------|-----------|--------|------|-------------------------|
| hydrocortisone (> 40 mg)                                                                             |                            | inducer   |        |      | 14 days                 |
| methylprednisolone (>8mg <sup>§</sup> ),                                                             |                            | inducer   |        |      | 14 days                 |
| prednisolone                                                                                         |                            | inducer   |        |      |                         |
| prednisone (> 10 mg)                                                                                 |                            | inducer   |        |      | 14 days                 |
| <b>Sedatives</b>                                                                                     |                            |           |        |      |                         |
| dexmedetomidine                                                                                      |                            | inhibitor |        |      |                         |
| diazepam                                                                                             |                            | inhibitor |        |      |                         |
| midazolam                                                                                            |                            | inhibitor |        |      |                         |
| propofol <sup>§</sup>                                                                                |                            | inhibitor |        |      |                         |
| <b>Pain medication</b>                                                                               |                            |           |        |      |                         |
| colchicine***                                                                                        | Hematologic                |           |        |      |                         |
| diclofenac                                                                                           |                            | inhibitor |        |      |                         |
| dihydroergotamine                                                                                    |                            | inhibitor |        |      |                         |
| ergotamine                                                                                           |                            | inhibitor |        |      |                         |
| Fentanyl                                                                                             |                            | inhibitor |        |      |                         |
| lidocaine                                                                                            |                            | inhibitor |        |      |                         |
| paracetamol                                                                                          |                            | inhibitor |        |      |                         |
| <i>Hospital pharmacists advice: This interaction is not clinically relevant, no action is needed</i> |                            |           |        |      |                         |
| <b>Antacids</b>                                                                                      |                            |           |        |      |                         |
| <i>Hospital pharmacists advice: This interaction is not clinically relevant, no action is needed</i> |                            |           |        |      |                         |
| rennies                                                                                              | Modify gastric acidity     |           |        |      | 1 hour before and after |
| mylanta / maalox (aluminum hydroxide, magnesium hydroxide simethicone)                               | Modify gastric acidity     |           |        |      | 1 hour before and after |
| tums                                                                                                 | Modify gastric acidity     |           |        |      | 1 hour before and after |
| <b>Other GI agents</b>                                                                               |                            |           |        |      |                         |
| aprepitant <sup>10</sup>                                                                             |                            | inhibitor |        |      | 7 days                  |

<sup>§</sup> Methylprednisolone at a single high dose (32mg) did not affect CYP3A4 activity and treatment with 8mg methylprednisolone daily for 9 days did not result in clinically significant induction of CYP3A3. (Villikka et al 2001)

\* Mentioned as powerful inhibitor/inducer in the KNMP Kennisbank.

Note: Relevance of an interaction also depends on properties of the substrate, such as therapeutic width, biological availability or another route of metabolism.

[https://kennisbank.knmp.nl/article/Informatorium\\_Medicamentorum/G1126.html](https://kennisbank.knmp.nl/article/Informatorium_Medicamentorum/G1126.html)

\*\* Mentioned as inhibitor/inducer in the KNMP Kennisbank

[https://kennisbank.knmp.nl/article/Informatorium\\_Medicamentorum/G1126.html](https://kennisbank.knmp.nl/article/Informatorium_Medicamentorum/G1126.html)

\*\*\* Prohibited medication in the Phase I trial at Duke (IND#74,188)



Table S3.1 Concomitant medications and products with possible interactions (continued)

|                                                                                             | Increased risk of toxicity                                                                           | CYP3A4         | CYP2D6         | P-gp           | Wash-out |
|---------------------------------------------------------------------------------------------|------------------------------------------------------------------------------------------------------|----------------|----------------|----------------|----------|
| cimetidine                                                                                  |                                                                                                      | inhibitor      | inhibitor      |                | 7 days   |
| lansoprazole                                                                                |                                                                                                      | inhibitor      |                | inhibitor      |          |
| nizatidine                                                                                  |                                                                                                      | inhibitor      |                |                |          |
| omeprazole                                                                                  |                                                                                                      | inhibitor      |                | inhibitor      |          |
|                                                                                             | <i>Hospital pharmacists advice: This interaction is not clinically relevant, no action is needed</i> |                |                |                |          |
| pantoprazole                                                                                |                                                                                                      |                |                | inhibitor      |          |
| rabeprazole                                                                                 |                                                                                                      | inhibitor      |                |                |          |
| <b>Histamine antagonists</b>                                                                |                                                                                                      |                |                |                |          |
| azelastine                                                                                  |                                                                                                      | inhibitor      |                |                |          |
| cimetidine                                                                                  |                                                                                                      | inhibitor      |                |                |          |
| clemastine <sup>11</sup>                                                                    |                                                                                                      | inhibitor      |                |                |          |
| diphenhydramine                                                                             |                                                                                                      |                | inhibitor      |                |          |
| <b>Herbal or dietary ingredients or supplements</b>                                         |                                                                                                      |                |                |                |          |
| caffeine                                                                                    |                                                                                                      | inhibitor      |                |                |          |
|                                                                                             | <i>Hospital pharmacists advice: This interaction is not clinically relevant, no action is needed</i> |                |                |                |          |
| cannabis oil                                                                                |                                                                                                      |                |                | inhibitor (10) |          |
| citrus fruits (other than grapefruit: sour orange/bitter orange, pomelo, sweetie/oroblanco) |                                                                                                      | inhibitor      |                |                | 7 days   |
| echinacea                                                                                   |                                                                                                      | inducer (11)   |                |                | 14 days  |
| evening primrose oil                                                                        |                                                                                                      | inducer (12)   | inhibitor (12) |                | 14 days  |
| ginkgo biloba                                                                               |                                                                                                      | inducer (12)   |                |                | 14 days  |
| ginseng                                                                                     | not conclusive(11, 13)                                                                               |                |                |                | 14 days  |
| golden seal (yellow root, <i>Hydrastis Canadensis</i> )                                     |                                                                                                      | inhibitor (14) | inhibitor (14) |                |          |
| grape fruit (or juice)                                                                      |                                                                                                      | inhibitor      |                |                | 7 days   |
| grape seed                                                                                  |                                                                                                      | inhibitor (13) |                |                | 14 days  |
| kava ( <i>piper methysticum</i> )                                                           | not conclusive (13)                                                                                  |                |                |                | 14 days  |
| St. John's Wort ( <i>hypericum</i> )                                                        |                                                                                                      | inducer**      |                | inducer**      | 14 days  |
| tumeric ( <i>curcuma longa</i> )                                                            |                                                                                                      | inhibitor (15) |                | inhibitor (16) |          |
| valerian                                                                                    | not conclusive (14)                                                                                  |                |                |                | 14 days  |
| <b>Other</b>                                                                                |                                                                                                      |                |                |                |          |
| acetazolamide (Diamox)                                                                      |                                                                                                      | inhibitor      |                |                |          |
| aminoglutethimide                                                                           |                                                                                                      | inducer        |                |                |          |

<sup>11</sup> Pre-specified exceptions are described below

\* Mentioned as powerful inhibitor/inducer in the KNMP Kennisbank.

Note: Relevance of an interaction also depends on properties of the substrate, such as therapeutical width, biological availability or another route of metabolism.

[https://kennisbank.knmp.nl/article/Informatarium\\_Medicamentorum/G1126.html](https://kennisbank.knmp.nl/article/Informatarium_Medicamentorum/G1126.html)

\*\* Mentioned as inhibitor/inducer in the KNMP Kennisbank

[https://kennisbank.knmp.nl/article/Informatarium\\_Medicamentorum/G1126.html](https://kennisbank.knmp.nl/article/Informatarium_Medicamentorum/G1126.html)

\*\*\* Prohibited medication in the Phase I trial at Duke (IND#74,188)

**Table S3.1 Concomitant medications and products with possible interactions (continued)**

|                                                                    | Increased risk of toxicity                                                                                    | CYP3A4    | CYP2D6      | P-gp      | Wash-out |
|--------------------------------------------------------------------|---------------------------------------------------------------------------------------------------------------|-----------|-------------|-----------|----------|
| bromocriptine                                                      |                                                                                                               | inhibitor |             |           |          |
| bosentan                                                           |                                                                                                               | inducer** |             |           |          |
| chlorzoxazone                                                      |                                                                                                               | inhibitor |             |           |          |
| cinacalcet                                                         |                                                                                                               |           | inhibitor   |           |          |
| conivaptan                                                         |                                                                                                               | inhibitor |             |           |          |
| coumarins (vitamin K antagonists)                                  | Possible fluctuation of coagulation times. Increased susceptibility to bleeding when thrombocytopenia occurs. |           |             |           |          |
|                                                                    | <i>Hospital pharmacist's advice: Change to another anticoagulant is advised (e.g. LMWH)</i>                   |           |             |           |          |
| disulfiram                                                         |                                                                                                               | inhibitor |             |           |          |
| entacapone                                                         |                                                                                                               | inhibitor |             |           |          |
| glibenclamide/ glyburide                                           |                                                                                                               | inhibitor |             |           |          |
| hydralazine                                                        |                                                                                                               | inhibitor |             |           |          |
| live virus vaccines                                                | miscellaneous <sup>12</sup>                                                                                   |           |             |           |          |
| methadone                                                          |                                                                                                               | inhibitor |             |           |          |
| mirabegron                                                         |                                                                                                               |           | inhibitor** |           |          |
| modafinil                                                          |                                                                                                               | inducer   |             |           |          |
| orphenadrine                                                       |                                                                                                               | inhibitor |             |           |          |
| oxybutynin                                                         |                                                                                                               | inhibitor |             |           |          |
| pergolide                                                          |                                                                                                               | inhibitor |             |           |          |
| pilocarpine                                                        |                                                                                                               | inhibitor |             |           |          |
| ranolazine                                                         |                                                                                                               | inhibitor |             | inhibitor |          |
| sildenafil                                                         |                                                                                                               | inhibitor |             |           |          |
| ticlopidine                                                        |                                                                                                               | inhibitor |             |           |          |
| zalfirlukast                                                       |                                                                                                               | inhibitor |             |           |          |
| <b>Caution with (not strictly prohibited, consider monitoring)</b> |                                                                                                               |           |             |           |          |
| digoxin                                                            | Doxorubicin can lower it's serum concentration                                                                |           |             |           |          |
| uric acid lowering agents                                          | Doxorubicin can increase serum uric acid concentration (such as sulfapyrazone*** and probenecid***)           |           |             |           |          |
| sorafenib                                                          | It might increase the doxorubicin dose                                                                        |           |             |           |          |
| dexrazoxane <sup>13</sup>                                          | It might result in lower response rates to doxorubicin                                                        |           |             |           |          |

<sup>12</sup> Administration of live or live-attenuated vaccines in patients immunocompromised by chemotherapeutic agents including doxorubicin, may result in serious or fatal infections. Vaccination with a live vaccine should be avoided in patients receiving doxorubicin. Killed or inactivated vaccines may be administered; however, the response to such vaccines may be diminished. Source: Pfizer 2010

<sup>13</sup> In a clinical study of women with metastatic breast cancer, the concurrent use of the cardioprotectant, dexrazoxane, with the initiation of a regimen of fluorouracil, doxorubicin, and cyclophosphamide (FAC) was associated with a lower tumor response rate. Source: Pfizer 2010.

\* Mentioned as powerful inhibitor/inducer in the KNMP Kennisbank.

Note: Relevance of an interaction also depends on properties of the substrate, such as therapeutical width, biological availability or another route of metabolism.

[https://kennisbank.knmp.nl/article/Informatorium\\_Medicamentorum/G1126.html](https://kennisbank.knmp.nl/article/Informatorium_Medicamentorum/G1126.html)

\*\* Mentioned as inhibitor/inducer in the KNMP Kennisbank

[https://kennisbank.knmp.nl/article/Informatorium\\_Medicamentorum/G1126.html](https://kennisbank.knmp.nl/article/Informatorium_Medicamentorum/G1126.html)

\*\*\* Prohibited medication in the Phase I trial at Duke (IND#74,188)

## S3.2 Pre-specified exceptions (possible interactions accepted)

### 1. Cyclophosphamide

“The addition of cyclophosphamide to doxorubicin treatment does not affect exposure to doxorubicin, but may result in an increase in exposure to doxorubicinol, a metabolite. Doxorubicinol only has 5% of the cytotoxic activity of doxorubicin. Concurrent treatment with doxorubicin has been reported to exacerbate cyclophosphamide-induced hemorrhagic cystitis.”(2) Concurrent cyclophosphamide treatment sensitizes the heart to the cardiotoxic effects of doxorubicin(17). However, since the AC regimen is frequently studied and used in daily practice, we anticipate a similar incidence of adverse events due to this interaction.

### 6. Glucocorticoids (dexamethasone)

Dexamethasone in the doses administered as premedication in this study induces CYP3A4 (7, 18), which could lower the doxorubicin concentration. However in the previous phase I and II dose finding studies (19), similar dosages of dexamethasone were administered (24 hours prior to treatment “dexamethasone 8 to 10 mg or an equivalent dose of a similar steroid consistent with local practice, every 12 hours x 3 doses” and 30 minutes prior to administration “IV Dexamethasone 20 mg”), therefore this interaction is accounted for in the maximum tolerable dose.

We will administer dexamethasone in the premedication regimen as specified in the protocol, according to our local practice for the prevention of allergic reactions. Additional dosages of glucocorticoids (above the specified dosages) are prohibited.

### 9. Propofol

A dosage-dependent inhibitory effect of propofol on cytochrome P450 3A4 has been described(20), indicating that a minimum clinical dosage could induce a significant inhibition of CYP 3A4 activity.

There is only one in vivo study where propofol decreased the clearance of midazolam, possibly via competitive inhibition of hepatic CYP3A4(21). Since no adverse events due to administration of propofol in combination with CYP3A4 substrates have been reported, we anticipate no severe interaction and administer propofol as specified in the protocol.

### 10. Aprepitant

As described by Dushenkov et al. “coadministration of aprepitant with antineoplastics may result in SS pharmacokinetic alterations in serum levels of cytotoxics, with the best documentation for cyclophosphamide, ifosfamide and erlotinib. (...) To date, there are no data convincingly linking adverse outcomes due to coadministration of aprepitant and antineoplastics”(22).

Since the use of aprepitant as antiemetic in the dosages specified in the protocol is part of our hospital's standard practice for the AC chemotherapy regimen, and there is no convincing evidence against it, we will administer aprepitant as specified in the protocol. Additional dosages of aprepitant will be prohibited.

### 11. Clemastine

Clemastine may inhibit CYP3A4 activity and therefore alter doxorubicin metabolism.

However clemastine is an essential part of the premedication regimen in our hospital for the prevention of allergic reactions. Since there are no reports in literature of clinically significant interactions with clemastine, and H1- antihistamine agents were also used in the dose finding study(19), we anticipate no severe interactions in our study and will administer clemastine as specified in the protocol.

**References:**

1. Celsion Corporation. ThermoDox<sup>®</sup>, Lyso-Thermosensitive Liposomal Doxorubicin (LTLTD), Investigator's Brochure. 2016.
2. Pfizer. Doxorubicin hydrochloride for injection, USP. USP. 2010; Available at: [http://www.accessdata.fda.gov/drugsatfda\\_docs/label/2010/050467s070lbl.pdf](http://www.accessdata.fda.gov/drugsatfda_docs/label/2010/050467s070lbl.pdf).
3. Zorginstituut Nederland. Farmacokinetiek. Farmacotherapeutisch Kompas. Brought up to date on December 1st 2016; Available at: <https://www.farmacotherapeutischkompas.nl/bladeren-volgens-boek/inleidingen/inl-farmacokinetiek>.
4. Lynch T, Price A. The Effect of Cytochrome P450 Metabolism on Drug Response, Interactions, and Adverse Effects. *American Family Physician*. 2007;76(3):391-6.
5. Haddad A, Davis M, Lagman R. The pharmacological importance of cytochrome CYP3A4 in the palliation of symptoms: review and recommendations for avoiding adverse drug interactions. *Support Care Cancer*. 2007;15(3):251-7.
6. KNMP Kennisbank. Informatorium Medicamentorum. Version 2.3.1.5 (2016); available at: [https://kennisbank.knmp.nl/article/Informatorium\\_Medicamentorum/intro.html](https://kennisbank.knmp.nl/article/Informatorium_Medicamentorum/intro.html).
7. McCune JS, Hawke RL, LeCluyse EL, Gillenwater HH, Hamilton G, Ritchie J, et al. In vivo and in vitro induction of human cytochrome P4503A4 by dexamethasone. *Clin Pharmacol Ther*. 2000;68(4):356-66.
8. Villikka K, Kivisto KT, Neuvonen PJ. The effect of dexamethasone on the pharmacokinetics of triazolam. *Pharmacol Toxicol*. 1998;83(3):135-8.
9. Villikka K, Varis T, Backman JT, Neuvonen PJ, Kivisto KT. Effect of methylprednisolone on CYP3A4-mediated drug metabolism in vivo. *Eur J Clin Pharmacol*. 2001;57(6-7):457-60.
10. Zhu HJ, Wang JS, Markowitz JS, Donovan JL, Gibson BB, Gefroh HA, et al. Characterization of P-glycoprotein inhibition by major cannabinoids from marijuana. *J Pharmacol Exp Ther*. 2006;317(2):850-7.
11. Hermann R, von Richter O. Clinical evidence of herbal drugs as perpetrators of pharmacokinetic drug interactions. *Planta Med*. 2012;78(13):1458-77.
12. Jalloh MA, Gregory PJ, Hein D, Risoldi Cochrane Z, Rodriguez A. Dietary supplement interactions with antiretrovirals: a systematic review. *Int J STD AIDS*. 2016.
13. Wanwimolruk S, Phopin K, Prachayasittikul V. Review article: cytochrome p450 enzyme mediated herbal drug interactions (part 2). *EXCLI Journal*. 2014;13:869-96.
14. Gurley BJ, Gardner SF, Hubbard MA, Williams DK, Gentry WB, Khan IA, et al. In vivo effects of goldenseal, kava kava, black cohosh, and valerian on human cytochrome P450 1A2, 2D6, 2E1, and 3A4 phenotypes. *Clin Pharmacol Ther*. 2005;77(5):415-26.
15. Shamsi S, Tran H, Tan RS, Tan ZJ, Lim LY. Curcumin, Piperine, and Capsaicin: A Comparative Study of Spice-Mediated Inhibition of Human Cytochrome P450 Isozyme Activities. *Drug Metab Dispos*. 2017;45(1):49-55.
16. Lopes-Rodrigues V, Sousa E, Vasconcelos MH. Curcumin as a Modulator of P-Glycoprotein in Cancer: Challenges and Perspectives. *Pharmaceuticals (Basel)*. 2016;9(4).
17. Pfizer. Product information Adriamycin<sup>®</sup> Solution for Injection available at: [http://www.pfizer.com/au/sites/g/files/g10005016/f/201311/PI\\_Adriamycin\\_212.pdf](http://www.pfizer.com/au/sites/g/files/g10005016/f/201311/PI_Adriamycin_212.pdf). Version pfpadrii10612 (2012).
18. Czock D, Keller F, Rasche FM, Häussler U. Pharmacokinetics and Pharmacodynamics of Systemically Administered Glucocorticoids. *Clin Pharmacokinet*. 2005;44(1):61-98.
19. Zagar TM, Vujaskovic Z, Formenti S, Rugo H, Muggia F, O'Connor B, et al. Two phase I dose-escalation/pharmacokinetics studies of low temperature liposomal doxorubicin (LTLTD) and mild local hyperthermia in heavily pretreated patients with local regionally recurrent breast cancer. *Int J Hyperthermia*. 2014;30(5):285-94.
20. Yang L-Q, Yu W-F, Cao Y-F, Gong B, Chang Q, Yang G-S. Potential inhibition of cytochrome P450 3A4 by propofol in human primary hepatocytes. *World J Gastroenterol*. 2003;9(9):1959-62.
21. Hamaoka N, Oda Y, Hase I, Mizutani K, Nakamoto T, Ishizaki T, et al. Propofol decreases the clearance of midazolam by inhibiting CYP3A4: an in vivo and in vitro study. *Clin Pharmacol Ther*. 1999;66:110-7.
22. Dushenkov A, Kalabalik J, Carbone A, Jungsuwadee P. Drug interactions with aprepitant or fosaprepitant: Review of literature and implications for clinical practice. *J Oncol Pharm Pract*. 2016.

**Supplement 4 Flow-chart interim analysis**

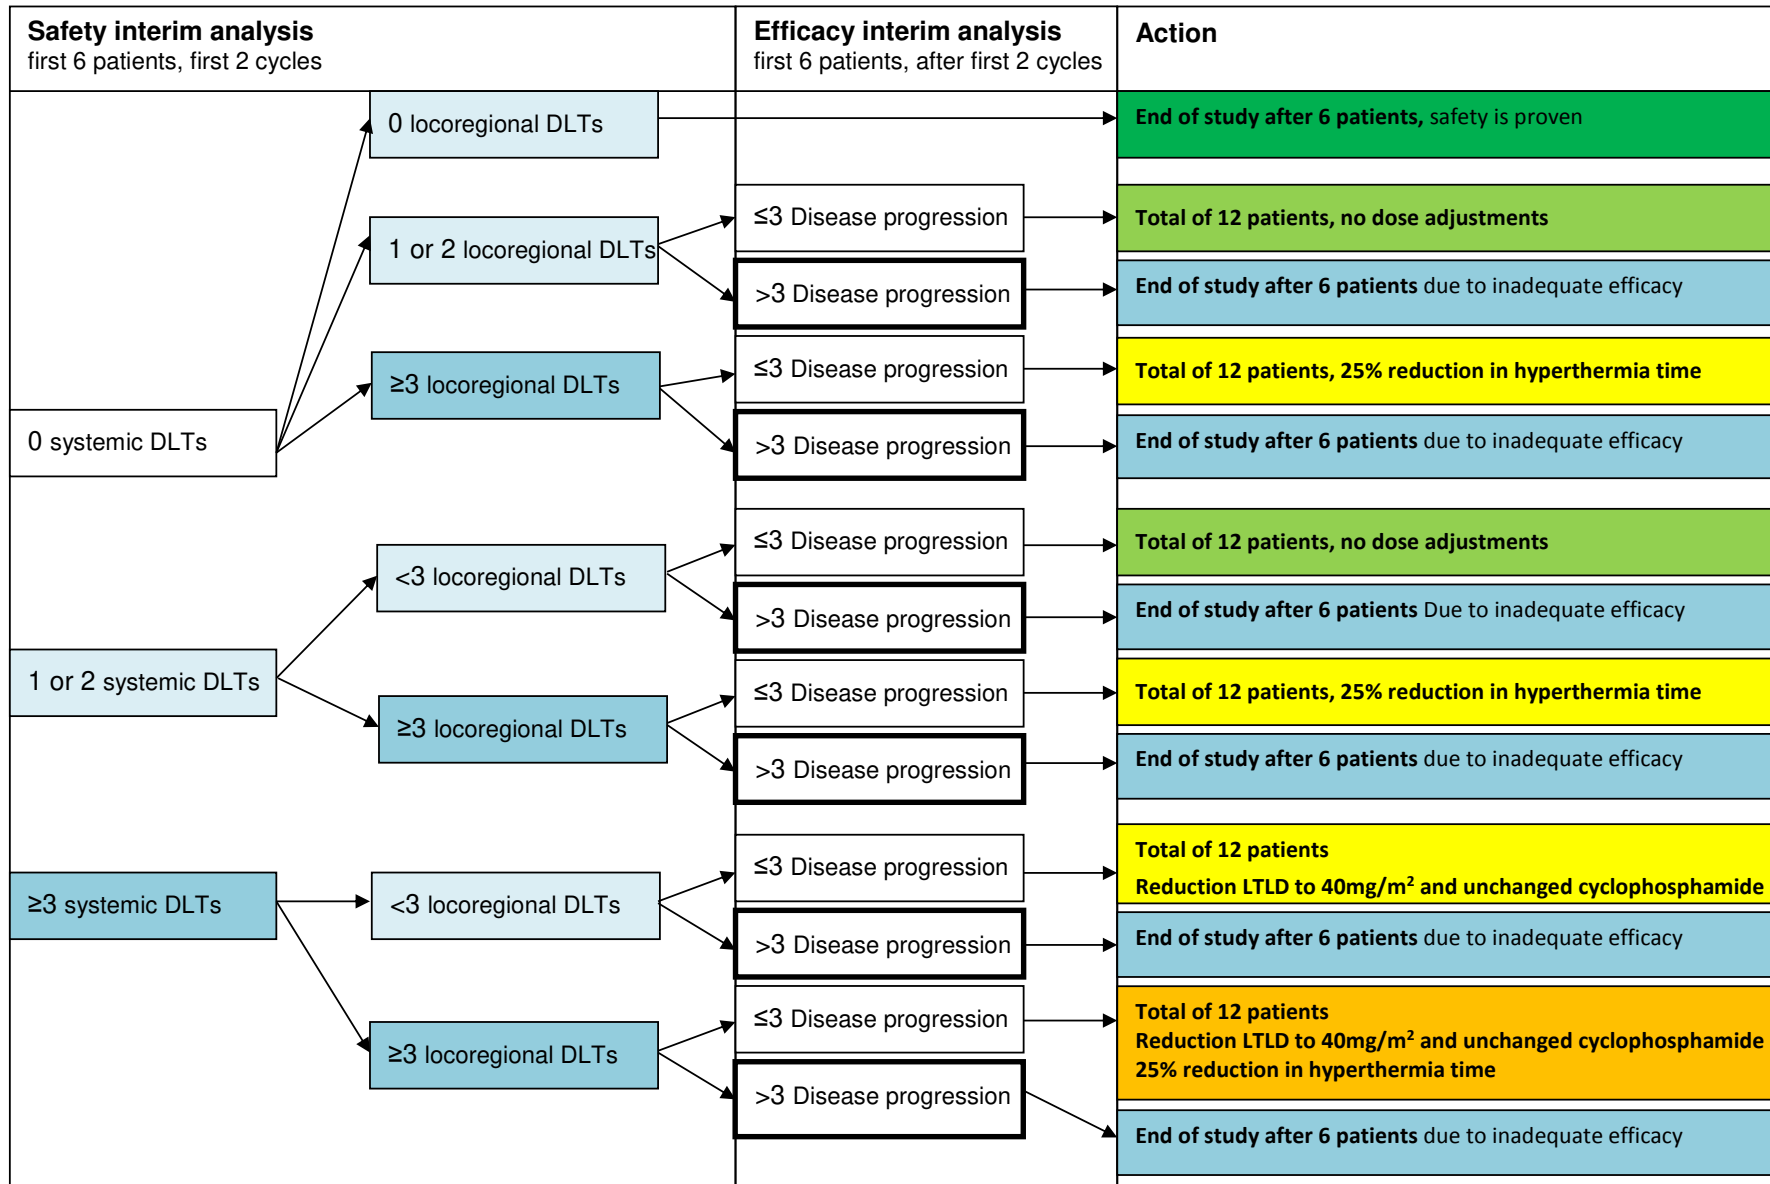

S21



## Supplement 5 Data Safety Monitoring Board Charter

### DMC (DSMB) charter for the i-GO study

Version 3, 14-01-2019

| CONTENT                                                            |                                                                                                                                                                                                                                                                                                                                                                                                                                                                                                                                                                                                                                                                                                                                                                                                                                                                                                                                                                                                                                                                                                       |
|--------------------------------------------------------------------|-------------------------------------------------------------------------------------------------------------------------------------------------------------------------------------------------------------------------------------------------------------------------------------------------------------------------------------------------------------------------------------------------------------------------------------------------------------------------------------------------------------------------------------------------------------------------------------------------------------------------------------------------------------------------------------------------------------------------------------------------------------------------------------------------------------------------------------------------------------------------------------------------------------------------------------------------------------------------------------------------------------------------------------------------------------------------------------------------------|
| <b>1. INTRODUCTION</b>                                             |                                                                                                                                                                                                                                                                                                                                                                                                                                                                                                                                                                                                                                                                                                                                                                                                                                                                                                                                                                                                                                                                                                       |
| Name (and sponsor's ID) of trial plus ISRCTN and/or EUDRACT number | <ul style="list-style-type: none"> <li><b>Trial name:</b><br/>Image-guided targeted doxorubicin delivery with hyperthermia to optimize loco-regional control in breast cancer; the i-GO feasibility study.<br/>Phase I Feasibility Study of High-Intensity Focused Ultrasound-Induced Hyperthermia (HIFU), Lyso-Thermosensitive Liposomal Doxorubicin (LTLTD), and Cyclophosphamide for Metastatic Breast Cancer</li> <li><b>Trial sponsor:</b> Imaging division and Cancer Center, University Medical Center (UMC) UTRECHT</li> <li><b>Type of trial:</b> Investigational drug trial and investigational medical device trial</li> <li><b>Number of patients to be included:</b> 6-12</li> <li><b>Number of sites:</b> single center (UMC Utrecht)</li> <li><b>Estimated trial duration:</b> 3 years</li> <li><b>EUDRACT number:</b> 2015-005582-23</li> <li><b>METC protocol number:</b> NL67422.041.18</li> <li><b>ClinicalTrials.gov Identifier:</b> to be determined</li> <li><b>Principal investigator:</b> B.B.M. Suelmann</li> <li><b>Coordinating investigator:</b> J. S. de Maar</li> </ul> |
| Objectives of trial, including interventions being investigated    | <p><b>Primary objective:</b> To determine safety, tolerability and feasibility of the administration of LTLTD + HIFU inducing local hyperthermia, combined with cyclophosphamide in metastatic breast cancer patients.</p> <p><b>Secondary objective:</b> Efficacy; to assess pathologic and clinically objective response from study treatment</p> <p>A flow chart of the trial design is included (Figure 1).</p>                                                                                                                                                                                                                                                                                                                                                                                                                                                                                                                                                                                                                                                                                   |
| Outline of scope of charter                                        | <p><i>The purpose of this document is to describe the roles and responsibilities of the independent DMC for the i-GO trial, including the timing of meetings, methods of providing information to and from the DMC, frequency and format of meetings, statistical issues and relationships with other committees.</i></p>                                                                                                                                                                                                                                                                                                                                                                                                                                                                                                                                                                                                                                                                                                                                                                             |
| <b>2. ROLES AND RESPONSIBILITIES</b>                               |                                                                                                                                                                                                                                                                                                                                                                                                                                                                                                                                                                                                                                                                                                                                                                                                                                                                                                                                                                                                                                                                                                       |
| A broad statement of the aims of the committee                     | <p><i>"To safeguard the interests of trial participants, assess the safety and efficacy of the interventions during the trial, and monitor the overall conduct of the clinical trial."</i></p>                                                                                                                                                                                                                                                                                                                                                                                                                                                                                                                                                                                                                                                                                                                                                                                                                                                                                                        |
| Terms of reference                                                 | <p><i>The DMC should receive and review the progress and accruing data of this trial and provide advice on the conduct of the trial to the Principal Investigator. The DMC should inform the Principal Investigator and Head of Department of Medical Oncology if, in their view:</i></p> <p><i>the results are likely to convince a broad range of clinicians, including those supporting the trial and the general clinical community, that the study treatment is clearly contraindicated or unsafe, and there was a reasonable expectation that this new evidence would materially influence patient management.</i></p>                                                                                                                                                                                                                                                                                                                                                                                                                                                                          |

|                                                         |                                                                                                                                                                                                                                                                                                                                                                                                                                                                                                                                                                                                                                                                                                                                                                                                                                                                                                                                                                                                                                                                                                                                                                                                                                                                  |
|---------------------------------------------------------|------------------------------------------------------------------------------------------------------------------------------------------------------------------------------------------------------------------------------------------------------------------------------------------------------------------------------------------------------------------------------------------------------------------------------------------------------------------------------------------------------------------------------------------------------------------------------------------------------------------------------------------------------------------------------------------------------------------------------------------------------------------------------------------------------------------------------------------------------------------------------------------------------------------------------------------------------------------------------------------------------------------------------------------------------------------------------------------------------------------------------------------------------------------------------------------------------------------------------------------------------------------|
| Specific roles of DMC                                   | <p>Interim review of the trial's progress including updated figures on recruitment, data quality, and main outcomes and safety data.</p> <p>A selection of specific aspects could be compiled from the following list:</p> <ul style="list-style-type: none"> <li>• assess data quality, including completeness (and by so doing encourage collection of high quality data)</li> <li>• monitor recruitment figures and losses to follow-up</li> <li>• monitor evidence for treatment harm (eg toxicity data, SAEs, deaths)</li> <li>• Monitor the interim safety and efficacy analysis as specified in the study protocol in section 10.4</li> <li>• decide whether to recommend that the trial continues to recruit participants or whether recruitment should be terminated either for everyone or for some participant subgroups</li> <li>• suggest additional data analyses</li> <li>• advise on protocol modifications suggested by investigators or sponsors (eg to inclusion criteria, trial endpoints, or sample size)</li> <li>• monitor compliance with previous DMC recommendations</li> <li>• considering the ethical implications of any recommendations made by the DMC</li> <li>• assess the impact and relevance of external evidence</li> </ul> |
| <b>3. BEFORE OR EARLY IN THE TRIAL</b>                  |                                                                                                                                                                                                                                                                                                                                                                                                                                                                                                                                                                                                                                                                                                                                                                                                                                                                                                                                                                                                                                                                                                                                                                                                                                                                  |
| Whether the DMC will have input into the protocol       | <p>All potential DMC members should have sight of the protocol/outline before agreeing to join the committee. Before recruitment begins the trial will have undergone review a research ethics committee. Therefore, if a potential DMC member has major reservations about the trial (eg the protocol or the logistics) they should report these to the PI and may decide not to accept the invitation to join. DMC members should be independent and constructively critical of the ongoing trial, but also supportive of aims and methods of the trial.</p>                                                                                                                                                                                                                                                                                                                                                                                                                                                                                                                                                                                                                                                                                                   |
| Whether the DMC will meet before the start of the trial | <p>It is recommended that, if possible, the DMC meets before the trial starts or early in the course of the trial, to discuss the protocol, the trial, any analysis plan, future meetings, and to have the opportunity to clarify any aspects with the principal investigators. The DMC should meet within one year of recruitment commencing.</p>                                                                                                                                                                                                                                                                                                                                                                                                                                                                                                                                                                                                                                                                                                                                                                                                                                                                                                               |
| Any issues specific to the disease under study          | <p>Issues specific to the disease under study:</p> <ul style="list-style-type: none"> <li>• The population consists of patients with metastatic breast cancer (stage IV disease), who have not received previous chemotherapy or surgery (previous antihormonal therapy is permitted)</li> <li>• It concerns a non-curable disease. Median survival is approximately 2 years, however there is a great heterogeneity in survival, ranging from a few months to many years, with 10-15 % of patients surviving ten years and more.</li> <li>• Most patients included in this trial will have the possibility to receive more treatment lines after this trial.</li> <li>• Goal of the treatment in this stage of disease is to maintain or improve the quality of life and to improve survival.</li> <li>• The natural course of the disease and the comorbidity are not always easy to distinguish from toxicity caused by the experimental treatment</li> </ul>                                                                                                                                                                                                                                                                                                 |

|                                                                                                                                                            |                                                                                                                                                                                                                                                                                                                                                                                                                                                                                                                                                                                                                                                                                                                                                                                                                                                                                                                                                                                                                                                                                                                                                                                                                                                                                                                                                                                            |
|------------------------------------------------------------------------------------------------------------------------------------------------------------|--------------------------------------------------------------------------------------------------------------------------------------------------------------------------------------------------------------------------------------------------------------------------------------------------------------------------------------------------------------------------------------------------------------------------------------------------------------------------------------------------------------------------------------------------------------------------------------------------------------------------------------------------------------------------------------------------------------------------------------------------------------------------------------------------------------------------------------------------------------------------------------------------------------------------------------------------------------------------------------------------------------------------------------------------------------------------------------------------------------------------------------------------------------------------------------------------------------------------------------------------------------------------------------------------------------------------------------------------------------------------------------------|
| <p>Any specific regulatory issues</p> <p>Any other issues specific to the treatment under study</p> <p>Whether members of the DMC will have a contract</p> | <p>The DMC should be aware of any regulatory implications of their recommendations.</p> <ul style="list-style-type: none"> <li>The investigational drug (ThermoDox) and the co-intervention cyclophosphamide are chemotherapeutics</li> <li>As with the majority of chemotherapy regimens, toxicities can be expected including bone-marrow toxicity, nausea, fatigue, stomatitis, alopecia, constipation, and musculoskeletal chest pain. These adverse events are expected in standard treatment as well.</li> <li>All chemotherapy agents are potentially teratogenic and mutagenic.</li> <li>Specific regulations apply for the administration and handling of chemotherapy (UMC Utrecht protocols will be followed)</li> <li>The study treatment consists of an investigational drug as well as an investigational device.</li> </ul> <ul style="list-style-type: none"> <li>Membership of the DMC (in agreement with the contents of this charter) will be accepted by the individual members and confirmed in writing and after submission of a signed and dated curriculum vitae (CV). The signed CV will be kept in the study file at the clinical trial bureau Medical Oncology.</li> <li>DMC members will sign a non-conflict of interest statement (Annex 1) in regard to this study which will be in the study file at the clinical trial bureau Medical Oncology.</li> </ul> |
| <p><b>4. COMPOSITION</b></p>                                                                                                                               |                                                                                                                                                                                                                                                                                                                                                                                                                                                                                                                                                                                                                                                                                                                                                                                                                                                                                                                                                                                                                                                                                                                                                                                                                                                                                                                                                                                            |
| <p>Membership and size of the DMC</p> <p>The Chair, how they are chosen and the Chair's role. (Likewise, if relevant, the vice-Chairman)</p>               | <p>The members will be independent of the trial (eg will not be involved with the trial in any other way or have some competing interest that could impact on the trial). Any competing interests, both real and potential, will be declared.</p> <p>The members of the DMC for this trial are:</p> <ol style="list-style-type: none"> <li><i>Hanneke van Laarhoven</i><br/>Medical oncologist at the Academic Medical Center (AMC) Amsterdam<br/>Clinician, experienced in the field of (medical) oncology and experienced in performing clinical trials</li> <li><i>Harm van Tinteren</i><br/>Head of scientific administration/biometrics department at the Antoni van Leeuwenhoek (AVL) hospital. Biostatistical reviewer.</li> <li><i>Geertjan van Tienhoven</i><br/>Radiation oncologist at the Academic Medical Center (AMC) Amsterdam<br/>Clinician, experienced in the field of (radiation) oncology and experienced in performing clinical trials</li> </ol> <p>Hanneke van Laarhoven will be the chair of the DMC.</p> <p>The Chair has previous experience of serving on DMCs and experience of chairing meetings, and is able to facilitate and summarize discussions. The Chair was chosen by the investigators.</p>                                                                                                                                                         |
| <p>The responsibilities of the DMC statistician</p> <p>The responsibilities of the trial statistician</p> <p>The responsibilities of the PI</p>            | <p>The DMC membership will include a statistician to provide independent statistical expertise.</p> <p>The project team will not have a trial statistician, this is not considered necessary based on the trial design.</p> <p><i>The coordinating investigator</i> will produce the report to the DMC.</p> <p>The PI, may be asked, and should be available, to attend open sessions of the DMC meeting.</p>                                                                                                                                                                                                                                                                                                                                                                                                                                                                                                                                                                                                                                                                                                                                                                                                                                                                                                                                                                              |



| <b>5. RELATIONSHIPS</b>                                                                                                          |                                                                                                                                                                                                                                                                                                                                                                                                                                                                                                                                                                                                                                                                                                                                                                                                                                                                                                                                                                                                                                                                                                                                                                                                                                                                                                                                                                                                                                                                                                                                                                                                                                                                                                                                                                                                                                                                                                                                                                                                                 |
|----------------------------------------------------------------------------------------------------------------------------------|-----------------------------------------------------------------------------------------------------------------------------------------------------------------------------------------------------------------------------------------------------------------------------------------------------------------------------------------------------------------------------------------------------------------------------------------------------------------------------------------------------------------------------------------------------------------------------------------------------------------------------------------------------------------------------------------------------------------------------------------------------------------------------------------------------------------------------------------------------------------------------------------------------------------------------------------------------------------------------------------------------------------------------------------------------------------------------------------------------------------------------------------------------------------------------------------------------------------------------------------------------------------------------------------------------------------------------------------------------------------------------------------------------------------------------------------------------------------------------------------------------------------------------------------------------------------------------------------------------------------------------------------------------------------------------------------------------------------------------------------------------------------------------------------------------------------------------------------------------------------------------------------------------------------------------------------------------------------------------------------------------------------|
| Clarification of whether the DMC are advisory (make recommendations) or executive (make decisions)                               | The DMC makes recommendations to the investigators.                                                                                                                                                                                                                                                                                                                                                                                                                                                                                                                                                                                                                                                                                                                                                                                                                                                                                                                                                                                                                                                                                                                                                                                                                                                                                                                                                                                                                                                                                                                                                                                                                                                                                                                                                                                                                                                                                                                                                             |
| Payments to DMC members                                                                                                          | Members will be reimbursed for travel expenses and for the costs of teleconferencing (if applicable).                                                                                                                                                                                                                                                                                                                                                                                                                                                                                                                                                                                                                                                                                                                                                                                                                                                                                                                                                                                                                                                                                                                                                                                                                                                                                                                                                                                                                                                                                                                                                                                                                                                                                                                                                                                                                                                                                                           |
| The need for DMC members to disclose information about any competing interests                                                   | <p>Competing interests should be disclosed. These are not restricted to financial matters – involvement in other trials or intellectual investment could be relevant. Although members may well be able to act objectively despite such connections, complete disclosure enhances credibility. (See Annex 1)</p> <p>DMC members should not use interim results to inform trading in pharmaceutical shares, and careful consideration should be given to trading in stock of companies with competing products.</p>                                                                                                                                                                                                                                                                                                                                                                                                                                                                                                                                                                                                                                                                                                                                                                                                                                                                                                                                                                                                                                                                                                                                                                                                                                                                                                                                                                                                                                                                                              |
| <b>6. ORGANISATION OF DMC MEETINGS</b>                                                                                           |                                                                                                                                                                                                                                                                                                                                                                                                                                                                                                                                                                                                                                                                                                                                                                                                                                                                                                                                                                                                                                                                                                                                                                                                                                                                                                                                                                                                                                                                                                                                                                                                                                                                                                                                                                                                                                                                                                                                                                                                                 |
| Expected frequency of DMC meetings                                                                                               | The DMC will meet approximately five times, during the trial. The exact frequency of meetings will depend upon trial events. The DMC will meet at least yearly.                                                                                                                                                                                                                                                                                                                                                                                                                                                                                                                                                                                                                                                                                                                                                                                                                                                                                                                                                                                                                                                                                                                                                                                                                                                                                                                                                                                                                                                                                                                                                                                                                                                                                                                                                                                                                                                 |
| Whether meetings will be face-to-face or by teleconference                                                                       | The first meeting should ideally be face-to-face to facilitate full discussion and allow members to get to know each other. It is recommended that all subsequent meetings should be face-to-face if possible, with teleconference as a second option.                                                                                                                                                                                                                                                                                                                                                                                                                                                                                                                                                                                                                                                                                                                                                                                                                                                                                                                                                                                                                                                                                                                                                                                                                                                                                                                                                                                                                                                                                                                                                                                                                                                                                                                                                          |
| How DMC meetings will be organised, especially regarding open and closed sessions, including who will be present in each session | <p>The format of the meetings will be:</p> <ol style="list-style-type: none"> <li>1. Open session: <b>Introductory meeting</b><br/>Before start of the trial.</li> <li>2. Closed session: <b>first data evaluation</b><br/>Once the first three patients completed two treatment cycles<br/>(if necessary extra open session for clarification of specific concerns)</li> <li>3. Closed session: <b>safety and efficacy interim analysis</b><br/>Once the first six patients completed two treatment cycles.<br/>(if necessary extra open session for clarification of specific concerns)</li> <li>4. (If applicable) Closed session: <b>further safety and efficacy analysis</b><br/>Once the first twelve patients completed two treatment cycles.<br/>(if necessary extra open session for clarification of specific concerns)</li> <li>5. Closed session: <b>follow up data evaluation, final evaluation</b></li> </ol> <p>The closed session will be restricted to the DMC members. The minutes of the closed session will be recorded by one of the members of the DMC. Minutes from the closed session will be recorded separately from the minutes of the open session and stored securely by the Chair. Closed session minutes, finalized by signature of the Chair, will be maintained in confidence and retained until discarded in accordance with applicable statutory regulation.</p> <p>The open session will be attended by representatives of the study investigators (in general the coordinating investigator). Data presented in the open session may include enrolment data, individual AE data, baseline characteristics, overall data accuracy and compliance data or issues, and other administrative data. Minutes of the open session will be recorded by one of the members of the DMC. Minutes will be finalized upon signature of the Chair and maintained in the study file at the clinical trial bureau Medical Oncology in accordance with applicable statutory regulation.</p> |

| <b>7. TRIAL DOCUMENTATION AND PROCEDURES<br/>TO ENSURE CONFIDENTIALITY AND<br/>PROPER COMMUNICATION</b>                              |                                                                                                                                                                                                                                                                                                                                                                                                                      |
|--------------------------------------------------------------------------------------------------------------------------------------|----------------------------------------------------------------------------------------------------------------------------------------------------------------------------------------------------------------------------------------------------------------------------------------------------------------------------------------------------------------------------------------------------------------------|
| Intended content of material to be available in open sessions                                                                        | <i>Open sessions: Accumulating information relating to recruitment and data quality (eg data return rates, treatment compliance) will be presented. Toxicity details based on pooled data will be presented and total numbers of events for the primary outcome measure (safety, tolerability and feasibility) and other outcome measures may be presented, at the discretion of the DMC.</i>                        |
| Intended content of material to be available in closed sessions                                                                      | <i>The same material will be available in the closed and open sessions.</i>                                                                                                                                                                                                                                                                                                                                          |
| Will the DMC be blinded to the treatment allocation                                                                                  | Not applicable.                                                                                                                                                                                                                                                                                                                                                                                                      |
| Who will see the accumulating data and interim analysis                                                                              | The DMC members perform the interim analysis (safety and efficacy), based on the data provided by the coordinating investigator, and report their recommendations to the principal investigator.<br><br>DMC members do <b>not</b> have the right to share confidential information with anyone outside the DMC, including the PI.                                                                                    |
| Who will be responsible for identifying and circulating external evidence (eg from other trials/ systematic reviews)                 | Identification and circulation of external evidence (eg from other trials/ systematic reviews) is not the responsibility of the DMC members. The PI or the trials office team will collate any such information.                                                                                                                                                                                                     |
| To whom the DMC will communicate the decisions/ recommendations that are reached                                                     | The DMC will report its recommendations in writing to the PI.                                                                                                                                                                                                                                                                                                                                                        |
| Whether reports to the DMC be available before the meeting or only at/during the meeting                                             | The DMC will receive the report from the coordinating investigator at least 2 weeks before any meetings.                                                                                                                                                                                                                                                                                                             |
| What will happen to the confidential papers after the meeting                                                                        | <i>The DMC members should destroy their reports after each meetings. Fresh copies of previous reports will be circulated with the newest report before each meeting.</i>                                                                                                                                                                                                                                             |
| <b>8. DECISION MAKING</b>                                                                                                            |                                                                                                                                                                                                                                                                                                                                                                                                                      |
| What decisions/recommendations will be open to the DMC                                                                               | Possible recommendations could include: <ul style="list-style-type: none"> <li>• No action needed, trial continues as planned</li> <li>• Early stopping due, for example, to clear harm of a treatment, futility, or external evidence</li> <li>• Stopping recruitment within a subgroup</li> <li>• Extending recruitment or extending follow-up</li> <li>• Sanctioning and/or proposing protocol changes</li> </ul> |
| The role of formal statistical methods, specifically which methods will be used and whether they will be used as guidelines or rules | The planned statistical analyses are described in chapter 10 of the study protocol.<br><br>Specifically, an interim safety evaluation and an interim efficacy evaluation will be performed (section 10.4 of the study protocol) :<br><br><u>In summary, at the interim evaluations:</u>                                                                                                                              |

|                                                                                                                                                |                                                                                                                                                                                                                                                                                                                                                                                                                                                                                                                                                                                                                                                                                               |
|------------------------------------------------------------------------------------------------------------------------------------------------|-----------------------------------------------------------------------------------------------------------------------------------------------------------------------------------------------------------------------------------------------------------------------------------------------------------------------------------------------------------------------------------------------------------------------------------------------------------------------------------------------------------------------------------------------------------------------------------------------------------------------------------------------------------------------------------------------|
|                                                                                                                                                | <p>The trial will continue to accrue until a total of 12 subjects have been treated if both the following occur:</p> <ul style="list-style-type: none"> <li>• a maximum of three of the first six subjects show disease progression after cycle 2; <b>AND:</b></li> <li>• either one or two systemic DLTs (dose limiting toxicities) were seen among the first two cycles of the first six subjects <b>OR</b></li> <li>•(if no systemic DLTs were seen) any locoregional DLT was seen among the first two cycles of the first six subjects</li> </ul> <p>Specific criteria for dose adjustments for the entire study population are also specified in section 10.4 of the study protocol.</p> |
| How decisions or recommendations will be reached within the DMC                                                                                | <p>Every effort should be made for the DMC to reach an unanimous decision. However, if this is not possible, the majority vote will decide.</p> <p>It is important that the implications (eg ethical, statistical, practical, financial) for the trial be considered before any recommendation is made.</p> <p>The Chair will summarise discussions and encourage consensus; it may be best for the Chair to give their own opinion last.</p>                                                                                                                                                                                                                                                 |
| When the DMC is quorate for decision-making                                                                                                    | <p><i>Effort should be made for all members to attend. The coordinating investigator will try to ensure that a date is chosen to enable this. Members who cannot attend in person should be encouraged to attend by teleconference. If, at short notice, any DMC members cannot attend at all then the DMC may still meet if at least one statistician and one clinician, including the Chair will be present. If the DMC is considering recommending major action after such a meeting the DMC Chair should talk with the absent members as soon after the meeting as possible to check they agree. If they do not, a further teleconference should be arranged with the full DMC.</i></p>   |
| Can DMC members who cannot attend the meeting input                                                                                            | <p>If the report is circulated before the meeting, DMC members who will not be able to attend the meeting may pass comments to the DMC Chair for consideration during the discussions.</p>                                                                                                                                                                                                                                                                                                                                                                                                                                                                                                    |
| What happens to members who do not attend meetings                                                                                             | <p><i>If a member does not attend a meeting, it should be ensured that the member is available for the next meeting. If a member does not attend a second meeting, they should be asked if they wish to remain part of the DMC. If a member does not attend a third meeting, they should be replaced.</i></p>                                                                                                                                                                                                                                                                                                                                                                                 |
| Whether different weight will be given to different endpoints (eg safety/efficacy)                                                             | <p>Safety and efficacy interim analyses are equally important and both determine whether the trial will be continued, as specified in section 10.4 of the study protocol.</p>                                                                                                                                                                                                                                                                                                                                                                                                                                                                                                                 |
| Any specific issues relating to the trial design that might influence the proceedings, eg cluster trials, equivalence trials, multi-arm trials | <p>The safety interim analysis and efficacy interim analysis will both be performed once the first six patients completed two treatment cycles.</p> <p>It is possible (and expected) that when the sixth patient completes her second treatment cycle, the first patient will already have completed all treatment cycles.</p>                                                                                                                                                                                                                                                                                                                                                                |

**9. REPORTING**

To whom will the DMC report their recommendations/decisions, and in what form

The DMC will report their recommendations/decisions in the form of a letter to the PI and coordinating investigator, within 2 weeks. A copy of the letter will be kept in the study file at the Clinical trial bureau Medical Oncology.

Whether minutes of the meeting be made and, if so, by whom and where they will be kept

As described in chapter 6 of this charter minutes of the meetings will be taken by one of the DMC members and will be kept at the clinical trial bureau.

What will be done if there is disagreement between the DMC and the body to which it reports

*"If the DMC has serious problems or concerns with the PI's decision a meeting should be held. The information to be shown would depend upon the action proposed and the DMC's concerns. Depending on the reason for the disagreement confidential data will often have to be revealed to all those attending such a meeting. The meeting should be chaired by a senior member of the trials office staff or an external expert who is not directly involved with the trial."*

**10. AFTER THE TRIAL**

Publication of results

At the end of the trial there may be a meeting to allow the DMC to discuss the final data with principal trial investigators and give advice about data interpretation.

The trial results will be published in a correct and timely manner.

The information about the DMC that will be included in published trial reports

DMC members should be named and their affiliations listed in the main report. A brief summary of the timings and conclusions of DMC meetings should be included in the body of this paper.

Any constraints on DMC members divulging information about their deliberations after the trial has been published

The DMC may discuss issues from their involvement in the trial when permission is agreed with the PI.

I hereby declare that I have read the charter and that I agree with its contents.

Name: \_\_\_\_\_

Signed: \_\_\_\_\_

Date: \_\_\_\_\_

Patient informed consent form i-GO study  
 NL67422.041.18 – version 5, 06-08-2020 page 1/3

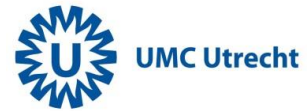

## Supplement 6.1 Patient informed consent form in English

### The i-GO study: treatment of breast cancer using chemotherapy encapsulated in temperature sensitive nanoparticles, in combination with local warming of the tumour.

- I have read the information letter. I was able to ask questions. My questions have been sufficiently answered. I had sufficient time to decide whether or not I will participate.
- I know that participation is voluntary. I also know that at any moment, I can decide not to participate after all or to quit the study. I don't have to provide a reason for that.
- I give consent to inform my general practitioner, treating medical specialist(s) and pharmacy that I participate in this study.
- I give consent to request information (medical data, laboratory results and previously made scans) from my general practitioner and treating medical specialist(s) from other hospitals.
- I give consent to notify my general practitioner and/or treating medical specialist(s) about unexpected findings that are or could be of importance to my health.
- I know that I cannot become pregnant during the study.
- I consent to collect and use my data and blood samples in the way and for the causes that are described in the information letter.
- I know that, in order to monitor the study, certain persons will have access to all my data. These persons are stated in the information letter. I give consent for access by these persons.
- I give consent to keep my data at the UMC Utrecht for 15 years after this study.
- I  **do**  
 **do not**  
 give consent to use my personal data for future research on the topic of breast cancer, during the 15 year that the data have to be kept.
- I  **do**  
 **do not**  
 give consent to approach me after this study for a follow-up study or other research on the topic of breast cancer.
- I know that, in case I have side effects of the treatment, coded data on the side effects will be provided to Profound Medical and Celsion. These data cannot be traced back to me personally.
- I  **do**  
 **do not**  
 give consent to provide coded data (other than side effects) to Profound Medical and Celsion. These data cannot be traced back to me personally.
- I want to participate in this study.

Name study subject:

Signature:

Date : \_\_ / \_\_ / \_\_

Patient informed consent form i-GO study  
NL67422.041.18 – version 5, 06-08-2020 page 2/3

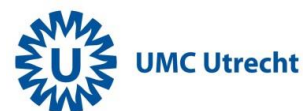

I declare that I have fully informed this subject on the mentioned study.

If, during the duration of the study, information will become available that could affect the subject's consent, then I will timely inform her about that.

Name investigator (or representative):

Signature:

Date: \_\_ / \_\_ / \_\_

Patient informed consent form i-GO study  
NL67422.041.18 – version 5, 06-08-2020 page 3/3

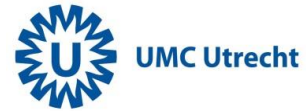

## Supplement 6.2 Patient informed consent form for Biobank research in English

### Biobank research of the i-GO study

(This is a separate part of the i-GO study, for which you can give consent separately)

- I  **do**  
 **do not** give consent to draw **extra blood** which will be coded and kept indefinitely in the Central Biobank of the UMC Utrecht, for future research on the topic of breast cancer.
- I  **do**  
 **do not** give consent to use my body material that has been obtained during breast biopsies, breast surgery or biopsies of metastases (to confirm my diagnosis or after the end of this study), to use this body material for further research and to keep it, as is explained in the patient information letter.
- I  **do**  
 **do not** give consent to keep my data at the UMC Utrecht for longer than 15 years and to use it for future research on the topic of breast cancer.
- I know that I can withdraw my consent to the Biobank research at any moment. I don't have to provide a reason for that.

Name study subject:

Signature:

Date : \_\_ / \_\_ / \_\_

-----

I declare that I have fully informed this subject on the mentioned study.

If, during the duration of the study, information will become available that could affect the subject's consent, then I will timely inform her about that.

Name investigator (or representative):

Signature:

Date: \_\_ / \_\_ / \_\_
